# Supplementary material for: Exploring Impaired SERCA Pump-Caused Alternation Occurrence in Ischemia
Source: Comput Math Methods Med. 2019 Nov 12;2019:8237071. doi: 10.1155/2019/8237071 (PMC6885202; doi:10.1155/2019/8237071)
Supplement: Supplementary Materials — Our supplementary files include the modified human ventricular cell model, codes, and data for plotting figures in our papers. [file 8237071.f1.zip]

Archive with 19 entries (17 files):
- 8237071.f1/native format/
- 8237071.f1/native format/A11.mat
- 8237071.f1/native format/A20.mat
- 8237071.f1/native format/A21.mat
- 8237071.f1/native format/A30.mat
- 8237071.f1/native format/A31.mat
- 8237071.f1/native format/A4.mat
- 8237071.f1/native format/A5.mat
- 8237071.f1/native format/figure1.m
- 8237071.f1/native format/figure2.m
- 8237071.f1/native format/figure3.m
- 8237071.f1/native format/figure4.m
- 8237071.f1/native format/figure5.m
- 8237071.f1/native format/main.m
- 8237071.f1/native format/model.m
- 8237071.f1/native format/Tran_SERCA_3state.m
- 8237071.f1/pdf format/
- 8237071.f1/pdf format/supplementary material_codes.pdf
- 8237071.f1/pdf format/supplementary material_data.xlsx
