# Supplementary material for: Exploring Impaired SERCA Pump-Caused Alternation Occurrence in Ischemia
Source: Comput Math Methods Med. 2019 Nov 12;2019:8237071. doi: 10.1155/2019/8237071 (PMC6885202; doi:10.1155/2019/8237071)
Supplement: Supplementary Materials — Our supplementary files include the modified human ventricular cell model, codes, and data for plotting figures in our papers. [file 8237071.f1.zip › 8237071.f1/native format/figure3.m]

clear all;
close all;
clc;
load A30; %There are instructions about it in the following
load A31; %There are instructions about it in the following
a01 = reshape(A30(:,1),[20,3]);% The values of '¦Á ¦Â ¦Ã¡¯in the control group. Calculating these values for 20 times
a11 = reshape(A30(:,2),[20,3]);% The values of '¦Á ¦Â ¦Ã¡¯in the case 1 with CL = 250ms
a02 = reshape(A30(:,3),[20,3]);% The values of '¦Á ¦Â ¦Ã¡¯in the control group 
a12 = reshape(A30(:,4),[20,3]);% The values of '¦Á ¦Â ¦Ã¡¯in the case 2 with CL = 250ms
a03 = reshape(A30(:,5),[20,3]);% The values of '¦Á ¦Â ¦Ã¡¯in the control group 
a13 = reshape(A30(:,6),[20,3]);% The values of '¦Á ¦Â ¦Ã¡¯in the case 3 with CL = 250ms

b02 = reshape(A31(:,1),[21,3]);% The values of '¦Á ¦Â ¦Ã¡¯in the control group. Calculating these values for 21 times
b22 = reshape(A31(:,2),[21,3]);% The values of '¦Á ¦Â ¦Ã¡¯in the case 1 with CL = 300ms
b03 = reshape(A31(:,3),[21,3]);% The values of '¦Á ¦Â ¦Ã¡¯in the control group 
b23 = reshape(A31(:,4),[21,3]);% The values of '¦Á ¦Â ¦Ã¡¯in the case 1 with CL = 300ms


subplot(3,2,1);
boxplot([a01 a11],'label',{'¦Á','¦Â','¦Ã','¦Á','¦Â','¦Ã'});
title('Control vs Case 1');
subplot(3,2,3);
boxplot([a02 a12],'label',{'¦Á','¦Â','¦Ã','¦Á','¦Â','¦Ã'});
title('Control vs Case 2');
subplot(3,2,5);
boxplot([a03 a13],'label',{'¦Á','¦Â','¦Ã','¦Á','¦Â','¦Ã'});

subplot(3,2,2);
boxplot([b02 b22],'label',{'¦Á','¦Â','¦Ã','¦Á','¦Â','¦Ã'});
title('Control vs Case 2');
subplot(3,2,4);
boxplot([b03 b23],'label',{'¦Á','¦Â','¦Ã','¦Á','¦Â','¦Ã'});
title('Control vs Case 3');


annotation('textbox',[0.321428571428571 0.72280952501581 0.135714285714285 0.0486190464127619],'String',{'CL=250ms'},'FitBoxToText','off');
annotation('textbox',[0.321428571428571 0.420428572634862 0.135714285714285 0.0486190464127619],'String',{'CL=250ms'},'FitBoxToText','off');
annotation('textbox',[0.32142857142857 0.120428572634867 0.135714285714285 0.0486190464127619],'String',{'CL=250ms'},'FitBoxToText','off');
annotation('textbox',[0.762499999999994 0.720428572634868 0.135714285714285 0.048619046412762],'String',{'CL=300ms'},'FitBoxToText','off');
annotation('textbox',[0.762499999999995 0.420428572634864 0.135714285714285 0.0486190464127619],'String',{'CL=300ms'},'FitBoxToText','off');

annotation('textbox',[0.0423 0.89 0.059 0.067],'String',{'a'},'LineStyle','none');
annotation('textbox',[0.475 0.89 0.059 0.067],'String',{'d'},'LineStyle','none');
annotation('textbox',[0.0423 0.6 0.059 0.067],'String',{'b'},'LineStyle','none');
annotation('textbox',[0.475 0.6 0.059 0.067],'String',{'e'},'LineStyle','none');
annotation('textbox',[0.0423 0.28 0.059 0.067],'String',{'c'},'LineStyle','none');
