# Supplementary material for: Exploring Impaired SERCA Pump-Caused Alternation Occurrence in Ischemia
Source: Comput Math Methods Med. 2019 Nov 12;2019:8237071. doi: 10.1155/2019/8237071 (PMC6885202; doi:10.1155/2019/8237071)
Supplement: Supplementary Materials — Our supplementary files include the modified human ventricular cell model, codes, and data for plotting figures in our papers. [file 8237071.f1.zip › 8237071.f1/native format/main.m]

% Copyright (c) 2011-2015 by Thomas O'Hara, Yoram Rudy, 
%                            Washington University in St. Louis.
% All rights reserved.
% 
% Redistribution and use in source and binary forms, with or without
% modification, are permitted provided that the following conditions are
% met:
% 
% 1. Redistributions of source code must retain the above copyright notice,
% this list of conditions and the following disclaimer.
% 
% 2. Redistributions in binary form must reproduce the above copyright 
% notice, this list of conditions and the following disclaimer in the 
% documentation and/or other materials provided with the distribution.
% 
% 3. Neither the names of the copyright holders nor the names of its
% contributors may be used to endorse or promote products derived from 
% this software without specific prior written permission.
% 
% THIS SOFTWARE IS PROVIDED BY THE COPYRIGHT HOLDERS AND CONTRIBUTORS "AS 
% IS" AND ANY EXPRESS OR IMPLIED WARRANTIES, INCLUDING, BUT NOT LIMITED 
% TO, THE IMPLIED WARRANTIES OF MERCHANTABILITY AND FITNESS FOR A 
% PARTICULAR PURPOSE ARE DISCLAIMED. IN NO EVENT SHALL THE COPYRIGHT 
% HOLDERS OR CONTRIBUTORS BE LIABLE FOR ANY DIRECT, INDIRECT, INCIDENTAL, 
% SPECIAL, EXEMPLARY, OR CONSEQUENTIAL DAMAGES (INCLUDING, BUT NOT 
% LIMITED TO, PROCUREMENT OF SUBSTITUTE GOODS OR SERVICES; LOSS OF 
% USE, DATA, OR PROFITS; OR BUSINESS INTERRUPTION) HOWEVER CAUSED AND 
% ON ANY THEORY OF LIABILITY, WHETHER IN CONTRACT, STRICT LIABILITY, 
% OR TORT (INCLUDING NEGLIGENCE OR OTHERWISE) ARISING IN ANY WAY OUT OF 
% THE USE OF THIS SOFTWARE, EVEN IF ADVISED OF THE POSSIBILITY OF SUCH
% DAMAGE.

% MATLAB Implementation of the O'Hara-Rudy dynamic (ORd) model for the
% undiseased human ventricular action potential and calcium transient
%
% The ORd model is described in the article "Simulation of the Undiseased
% Human Cardiac Ventricular Action Potential: Model Formulation and
% Experimental Validation"
% by Thomas O'Hara, Laszlo Virag, Andras Varro, and Yoram Rudy
%
% The article and supplemental materails are freely available in the
% Open Access jounal PLoS Computational Biology
% Link to Article:
% http://www.ploscompbiol.org/article/info:doi/10.1371/journal.pcbi.1002061
% 
% Email: tom.ohara@gmail.com / rudy@wustl.edu
% Web: http://rudylab.wustl.edu
% 

close all
clear all
 
%initial conditions for state variables
v=-87;
nai=7;
nass=nai;
ki=145;
kss=ki;
cai=1.0e-4;
cass=cai;
cansr=1.2;
cajsr=cansr;
m=0;
hf=1;
hs=1;
j=1;
hsp=1;
jp=1;
mL=0;
hL=1;
hLp=1;
a=0;
iF=1;
iS=1;
ap=0;
iFp=1;
iSp=1;
d=0;
ff=1;
fs=1;
fcaf=1;
fcas=1;
jca=1;
nca=0;
ffp=1;
fcafp=1;
xrf=0;
xrs=0;
xs1=0;
xs2=0;
xk1=1;
Jrelnp=0;
Jrelp=0;
CaMKt=0;

timeStep1=1;
Length_array=100000;
T_array1=zeros(Length_array,1);
T_array1(1) = 500;
options1 = odeset('MaxStep',0.1);       %   Set integrator options

%X0 is the vector for initial sconditions for state variables
X0=[v nai nass ki kss cai cass cansr cajsr m hf hs j hsp jp mL hL hLp a iF iS ap iFp iSp d ff fs fcaf fcas jca nca ffp fcafp xrf xrs xs1 xs2 xk1 Jrelnp Jrelp CaMKt]';
CL=300;%pacing cycle length in ms
beats=10;%number of beats in the simulation
options=odeset('MaxStep',1);%options for ode solver
X = [];
T = [];

for m = [1:beats]
[TT XX]=ode23t(@model,[0 CL],X0',options1,1);
X = [X;XX];
T = [T;CL*(m-1)+TT];
X0 = XX(size(XX,1),:);
m
end


%rename values in the state variables vector
v=X(:,1);
nai=X(:,2);
nass=X(:,3);
ki=X(:,4);
kss=X(:,5);
cai=X(:,6);
cass=X(:,7);
cansr=X(:,8);
cajsr=X(:,9);
m=X(:,10);
hf=X(:,11);
hs=X(:,12);
j=X(:,13);
hsp=X(:,14);
jp=X(:,15);
mL=X(:,16);
hL=X(:,17);
hLp=X(:,18);
a=X(:,19);
iF=X(:,20);
iS=X(:,21);
ap=X(:,22);
iFp=X(:,23);
iSp=X(:,24);
d=X(:,25);
ff=X(:,26);
fs=X(:,27);
fcaf=X(:,28);
fcas=X(:,29);
jca=X(:,30);
nca=X(:,31);
ffp=X(:,32);
fcafp=X(:,33);
xrf=X(:,34);
xrs=X(:,35);
xs1=X(:,36);
xs2=X(:,37);
xk1=X(:,38);
Jrelnp=X(:,39);
Jrelp=X(:,40);
CaMKt=X(:,41);

% calculate and name dependent variables for the final beat in the
% simulation (i.e. currents and fluxes)
for i=[1:size(X,1)];
    IsJs=model(T(i),X(i,:),0);
    INa(i)=IsJs(1);
    INaL(i)=IsJs(2);
    Ito(i)=IsJs(3);
    ICaL(i)=IsJs(4);
    IKr(i)=IsJs(5);
    IKs(i)=IsJs(6);
    IK1(i)=IsJs(7);
    INaCa_i(i)=IsJs(8);
    INaCa_ss(i)=IsJs(9);
    INaK(i)=IsJs(10);
    IKb(i)=IsJs(11);
    INab(i)=IsJs(12);
    ICab(i)=IsJs(13);
    IpCa(i)=IsJs(14);
    Jdiff(i)=IsJs(15);
    JdiffNa(i)=IsJs(16);
    JdiffK(i)=IsJs(17);
    Jup(i)=IsJs(18);
    Jleak(i)=IsJs(19);
    Jtr(i)=IsJs(20);
    Jrel(i)=IsJs(21);
    CaMKa(i)=IsJs(22);
    Istim(i)=IsJs(23);
end

%cell geometry
L=0.01;
rad=0.0011;
vcell=1000*3.14*rad*rad*L;
vnsr=0.0552*vcell;
vjsr=0.0048*vcell;
Casr = (vjsr*X(:,8) + vnsr*X(:,9))/(vjsr+vnsr); %Ca2+ concentration in the SR

figure(1)
plot(T,v);
xlabel('T (ms)');
ylabel('V (mv)');
figure(2) 
plot(T,X(:,6));
xlabel('T (ms)');
ylabel('Cai (mmol/L)');
figure(3) 
plot(T,Casr);
xlabel('T (ms)');
ylabel('Casr (mmol/L)');
