# Supplementary material for: Exploring Impaired SERCA Pump-Caused Alternation Occurrence in Ischemia
Source: Comput Math Methods Med. 2019 Nov 12;2019:8237071. doi: 10.1155/2019/8237071 (PMC6885202; doi:10.1155/2019/8237071)
Supplement: Supplementary Materials — Our supplementary files include the modified human ventricular cell model, codes, and data for plotting figures in our papers. [file 8237071.f1.zip › 8237071.f1/native format/model.m]

function output=model(t,X,flag_ode)

CL = 300;%ms

celltype=1; %endo = 0, epi = 1, M = 2

%extracellular ionic concentrations
nao=140.0;
cao=1.8;
ko=5.4;

%physical constants
R=8314.0;
T=310.0;
F=96485.0;

%cell geometry
L=0.01;
rad=0.0011;
vcell=1000*3.14*rad*rad*L;
Ageo=2*3.14*rad*rad+2*3.14*rad*L;
Acap=2*Ageo;
vmyo=0.68*vcell;
vnsr=0.0552*vcell;
vjsr=0.0048*vcell;
vss=0.02*vcell;

%parameters setting in control (used in SERCA three-state model)
  ADP = 0.015;
  Pi = 0;
  ATP_in=9.8;           
  Hi=10^(-4);   
  
%give names to the state vector values
v=X(1);
nai=X(2);
nass=X(3);
ki=X(4);
kss=X(5);
cai=X(6);
cass=X(7);
cansr=X(8);
cajsr=X(9);
m=X(10);
hf=X(11);
hs=X(12);
j=X(13);
hsp=X(14);
jp=X(15);
mL=X(16);
hL=X(17);
hLp=X(18);
a=X(19);
iF=X(20);
iS=X(21);
ap=X(22);
iFp=X(23);
iSp=X(24);
d=X(25);
ff=X(26);
fs=X(27);
fcaf=X(28);
fcas=X(29);
jca=X(30);
nca=X(31);
ffp=X(32);
fcafp=X(33);
xrf=X(34);
xrs=X(35);
xs1=X(36);
xs2=X(37);
xk1=X(38);
Jrelnp=X(39);
Jrelp=X(40);
CaMKt=X(41);

%%%%%%%%%%%%%%%%%%%%%%%%%%%%%%%%%%%%%%%%%%%%%%%%%%%%%%%%%%%%%%%%%%%%%%%

%CaMK constants
KmCaMK=0.15;

aCaMK=0.05;
bCaMK=0.00068;
CaMKo=0.05;
KmCaM=0.0015;
%update CaMK
CaMKb=CaMKo*(1.0-CaMKt)/(1.0+KmCaM/cass);
CaMKa=CaMKb+CaMKt;
dCaMKt=aCaMK*CaMKb*(CaMKb+CaMKt)-bCaMK*CaMKt;

%%%%%%%%%%%%%%%%%%%%%%%%%%%%%%%%%%%%%%%%%%%%%%%%%%%%%%%%%%%%%%%%%%%%%%%

%reversal potentials
ENa=(R*T/F)*log(nao/nai);
EK=(R*T/F)*log(ko/ki);
PKNa=0.01833;
EKs=(R*T/F)*log((ko+PKNa*nao)/(ki+PKNa*nai));

%convenient shorthand calculations
vffrt=v*F*F/(R*T);
vfrt=v*F/(R*T);

%%%%%%%%%%%%%%%%%%%%%%%%%%%%%%%%%%%%%%%%%%%%%%%%%%%%%%%%%%%%%%%%%%%%%%%

%calculate INa
mss=1.0/(1.0+exp((-(v+39.57))/9.871));
tm=1.0/(6.765*exp((v+11.64)/34.77)+8.552*exp(-(v+77.42)/5.955));
dm=(mss-m)/tm;
hss=1.0/(1+exp((v+82.90)/6.086));
thf=1.0/(1.432e-5*exp(-(v+1.196)/6.285)+6.149*exp((v+0.5096)/20.27));
ths=1.0/(0.009794*exp(-(v+17.95)/28.05)+0.3343*exp((v+5.730)/56.66));
Ahf=0.99;
Ahs=1.0-Ahf;
dhf=(hss-hf)/thf;
dhs=(hss-hs)/ths;
h=Ahf*hf+Ahs*hs;
jss=hss;
tj=2.038+1.0/(0.02136*exp(-(v+100.6)/8.281)+0.3052*exp((v+0.9941)/38.45));
dj=(jss-j)/tj;
hssp=1.0/(1+exp((v+89.1)/6.086));
thsp=3.0*ths;
dhsp=(hssp-hsp)/thsp;
hp=Ahf*hf+Ahs*hsp;
tjp=1.46*tj;
djp=(jss-jp)/tjp;
GNa=75;
fINap=(1.0/(1.0+KmCaMK/CaMKa));
INa=GNa*(v-ENa)*m^3.0*((1.0-fINap)*h*j+fINap*hp*jp);

%calculate INaL
mLss=1.0/(1.0+exp((-(v+42.85))/5.264));
tmL=tm;
dmL=(mLss-mL)/tmL;
hLss=1.0/(1.0+exp((v+87.61)/7.488));
thL=200.0;
dhL=(hLss-hL)/thL;
hLssp=1.0/(1.0+exp((v+93.81)/7.488));
thLp=3.0*thL;
dhLp=(hLssp-hLp)/thLp;
GNaL=0.0075;
if celltype==1
    GNaL=GNaL*0.6;
end
fINaLp=(1.0/(1.0+KmCaMK/CaMKa));
INaL=GNaL*(v-ENa)*mL*((1.0-fINaLp)*hL+fINaLp*hLp);

%calculate Ito
ass=1.0/(1.0+exp((-(v-14.34))/14.82));
ta=1.0515/(1.0/(1.2089*(1.0+exp(-(v-18.4099)/29.3814)))+3.5/(1.0+exp((v+100.0)/29.3814)));
da=(ass-a)/ta;
iss=1.0/(1.0+exp((v+43.94)/5.711));
if celltype==1
    delta_epi=1.0-(0.95/(1.0+exp((v+70.0)/5.0)));
else
    delta_epi=1.0;
end
tiF=4.562+1/(0.3933*exp((-(v+100.0))/100.0)+0.08004*exp((v+50.0)/16.59));
tiS=23.62+1/(0.001416*exp((-(v+96.52))/59.05)+1.780e-8*exp((v+114.1)/8.079));
tiF=tiF*delta_epi;
tiS=tiS*delta_epi;
AiF=1.0/(1.0+exp((v-213.6)/151.2));
AiS=1.0-AiF;
diF=(iss-iF)/tiF;
diS=(iss-iS)/tiS;
i=AiF*iF+AiS*iS;
assp=1.0/(1.0+exp((-(v-24.34))/14.82));
dap=(assp-ap)/ta;
dti_develop=1.354+1.0e-4/(exp((v-167.4)/15.89)+exp(-(v-12.23)/0.2154));
dti_recover=1.0-0.5/(1.0+exp((v+70.0)/20.0));
tiFp=dti_develop*dti_recover*tiF;
tiSp=dti_develop*dti_recover*tiS;
diFp=(iss-iFp)/tiFp;
diSp=(iss-iSp)/tiSp;
ip=AiF*iFp+AiS*iSp;
Gto=0.02;
if celltype==1
    Gto=Gto*4.0;
elseif celltype==2
    Gto=Gto*4.0;
end
fItop=(1.0/(1.0+KmCaMK/CaMKa));
Ito=Gto*(v-EK)*((1.0-fItop)*a*i+fItop*ap*ip);


[vcycle, pp] =  Tran_SERCA_3state(cai,cajsr,Hi,ATP_in,ADP,Pi); %adding the SERCA three-state modelin the cell model


dss=1.0/(1.0+exp((-(v+3.940))/4.230));
td=0.6+1.0/(exp(-0.05*(v+6.0))+exp(0.09*(v+14.0)));
dd=(dss-d)/td;
fss=1.0/(1.0+exp((v+19.58)/3.696));
tff=7.0+1.0/(0.0045*exp(-(v+20.0)/10.0)+0.0045*exp((v+20.0)/10.0));
tfs=1000.0+1.0/(0.000035*exp(-(v+5.0)/4.0)+0.000035*exp((v+5.0)/6.0));
Aff=0.6;
Afs=1.0-Aff;
dff=(fss-ff)/tff;
dfs=(fss-fs)/tfs;
f=Aff*ff+Afs*fs;
fcass=fss;
tfcaf=7.0+1.0/(0.04*exp(-(v-4.0)/7.0)+0.04*exp((v-4.0)/7.0));
tfcas=100.0+1.0/(0.00012*exp(-v/3.0)+0.00012*exp(v/7.0));
Afcaf=0.3+0.6/(1.0+exp((v-10.0)/10.0));
Afcas=1.0-Afcaf;
dfcaf=(fcass-fcaf)/tfcaf;
dfcas=(fcass-fcas)/tfcas;
fca=Afcaf*fcaf+Afcas*fcas;
tjca=75.0;
djca=(fcass-jca)/tjca;
tffp=2.5*tff;
dffp=(fss-ffp)/tffp;
fp=Aff*ffp+Afs*fs;
tfcafp=2.5*tfcaf;
dfcafp=(fcass-fcafp)/tfcafp;
fcap=Afcaf*fcafp+Afcas*fcas;
Kmn=0.002;
k2n=1000.0;
km2n=jca*1.0;
anca=1.0/(k2n/km2n+(1.0+Kmn/cass)^4.0);
dnca=anca*k2n-nca*km2n;
PhiCaL=4.0*vffrt*(cass*exp(2.0*vfrt)-0.341*cao)/(exp(2.0*vfrt)-1.0);
PhiCaNa=1.0*vffrt*(0.75*nass*exp(1.0*vfrt)-0.75*nao)/(exp(1.0*vfrt)-1.0);
PhiCaK=1.0*vffrt*(0.75*kss*exp(1.0*vfrt)-0.75*ko)/(exp(1.0*vfrt)-1.0);
zca=2.0;
PCa=0.0001;
if celltype==1
    PCa=PCa*1.2;
elseif celltype==2
    PCa=PCa*2.5;
end
PCap=1.1*PCa;
PCaNa=0.00125*PCa;
PCaK=3.574e-4*PCa;
PCaNap=0.00125*PCap;
PCaKp=3.574e-4*PCap;
fICaLp=(1.0/(1.0+KmCaMK/CaMKa));
ICaL=(1.0-fICaLp)*PCa*PhiCaL*d*(f*(1.0-nca)+jca*fca*nca)+fICaLp*PCap*PhiCaL*d*(fp*(1.0-nca)+jca*fcap*nca);
ICaNa=(1.0-fICaLp)*PCaNa*PhiCaNa*d*(f*(1.0-nca)+jca*fca*nca)+fICaLp*PCaNap*PhiCaNa*d*(fp*(1.0-nca)+jca*fcap*nca);
ICaK=(1.0-fICaLp)*PCaK*PhiCaK*d*(f*(1.0-nca)+jca*fca*nca)+fICaLp*PCaKp*PhiCaK*d*(fp*(1.0-nca)+jca*fcap*nca);

%calculate IKr
xrss=1.0/(1.0+exp((-(v+8.337))/6.789));
txrf=12.98+1.0/(0.3652*exp((v-31.66)/3.869)+4.123e-5*exp((-(v-47.78))/20.38));
txrs=1.865+1.0/(0.06629*exp((v-34.70)/7.355)+1.128e-5*exp((-(v-29.74))/25.94));
Axrf=1.0/(1.0+exp((v+54.81)/38.21));
Axrs=1.0-Axrf;
dxrf=(xrss-xrf)/txrf;
dxrs=(xrss-xrs)/txrs;
xr=Axrf*xrf+Axrs*xrs;
rkr=1.0/(1.0+exp((v+55.0)/75.0))*1.0/(1.0+exp((v-10.0)/30.0));
GKr=0.046;
if celltype==1
    GKr=GKr*1.3;
elseif celltype==2
    GKr=GKr*0.8;
end
IKr=GKr*sqrt(ko/5.4)*xr*rkr*(v-EK);

%calculate IKs
xs1ss=1.0/(1.0+exp((-(v+11.60))/8.932));
txs1=817.3+1.0/(2.326e-4*exp((v+48.28)/17.80)+0.001292*exp((-(v+210.0))/230.0));
dxs1=(xs1ss-xs1)/txs1;
xs2ss=xs1ss;
txs2=1.0/(0.01*exp((v-50.0)/20.0)+0.0193*exp((-(v+66.54))/31.0));
dxs2=(xs2ss-xs2)/txs2;
KsCa=1.0+0.6/(1.0+(3.8e-5/cai)^1.4);
GKs=0.0034;
if celltype==1
    GKs=GKs*1.4;
end
IKs=GKs*KsCa*xs1*xs2*(v-EKs);

xk1ss=1.0/(1.0+exp(-(v+2.5538*ko+144.59)/(1.5692*ko+3.8115)));
txk1=122.2/(exp((-(v+127.2))/20.36)+exp((v+236.8)/69.33));
dxk1=(xk1ss-xk1)/txk1;
rk1=1.0/(1.0+exp((v+105.8-2.6*ko)/9.493));
GK1=0.1908;
if celltype==1
    GK1=GK1*1.2;
elseif celltype==2
    GK1=GK1*1.3;
end
IK1=GK1*sqrt(ko)*rk1*xk1*(v-EK);

%calculate INaCa_i
kna1=15.0;
kna2=5.0;
kna3=88.12;
kasymm=12.5;
wna=6.0e4;
wca=6.0e4;
wnaca=5.0e3;
kcaon=1.5e6;
kcaoff=5.0e3;
qna=0.5224;
qca=0.1670;
hca=exp((qca*v*F)/(R*T));
hna=exp((qna*v*F)/(R*T));
h1=1+nai/kna3*(1+hna);
h2=(nai*hna)/(kna3*h1);
h3=1.0/h1;
h4=1.0+nai/kna1*(1+nai/kna2);
h5=nai*nai/(h4*kna1*kna2);
h6=1.0/h4;
h7=1.0+nao/kna3*(1.0+1.0/hna);
h8=nao/(kna3*hna*h7);
h9=1.0/h7;
h10=kasymm+1.0+nao/kna1*(1.0+nao/kna2);
h11=nao*nao/(h10*kna1*kna2);
h12=1.0/h10;
k1=h12*cao*kcaon;
k2=kcaoff;
k3p=h9*wca;
k3pp=h8*wnaca;
k3=k3p+k3pp;
k4p=h3*wca/hca;
k4pp=h2*wnaca;
k4=k4p+k4pp;
k5=kcaoff;
k6=h6*cai*kcaon;
k7=h5*h2*wna;
k8=h8*h11*wna;
x1=k2*k4*(k7+k6)+k5*k7*(k2+k3);
x2=k1*k7*(k4+k5)+k4*k6*(k1+k8);
x3=k1*k3*(k7+k6)+k8*k6*(k2+k3);
x4=k2*k8*(k4+k5)+k3*k5*(k1+k8);
E1=x1/(x1+x2+x3+x4);
E2=x2/(x1+x2+x3+x4);
E3=x3/(x1+x2+x3+x4);
E4=x4/(x1+x2+x3+x4);
KmCaAct=150.0e-6;
allo=1.0/(1.0+(KmCaAct/cai)^2.0);
zna=1.0;
JncxNa=3.0*(E4*k7-E1*k8)+E3*k4pp-E2*k3pp;
JncxCa=E2*k2-E1*k1;
Gncx=0.0008;
if celltype==1
    Gncx=Gncx*1.1;
elseif celltype==2
    Gncx=Gncx*1.4;
end
INaCa_i=0.8*Gncx*allo*(zna*JncxNa+zca*JncxCa);

%calculate INaCa_ss
h1=1+nass/kna3*(1+hna);
h2=(nass*hna)/(kna3*h1);
h3=1.0/h1;
h4=1.0+nass/kna1*(1+nass/kna2);
h5=nass*nass/(h4*kna1*kna2);
h6=1.0/h4;
h7=1.0+nao/kna3*(1.0+1.0/hna);
h8=nao/(kna3*hna*h7);
h9=1.0/h7;
h10=kasymm+1.0+nao/kna1*(1+nao/kna2);
h11=nao*nao/(h10*kna1*kna2);
h12=1.0/h10;
k1=h12*cao*kcaon;
k2=kcaoff;
k3p=h9*wca;
k3pp=h8*wnaca;
k3=k3p+k3pp;
k4p=h3*wca/hca;
k4pp=h2*wnaca;
k4=k4p+k4pp;
k5=kcaoff;
k6=h6*cass*kcaon;
k7=h5*h2*wna;
k8=h8*h11*wna;
x1=k2*k4*(k7+k6)+k5*k7*(k2+k3);
x2=k1*k7*(k4+k5)+k4*k6*(k1+k8);
x3=k1*k3*(k7+k6)+k8*k6*(k2+k3);
x4=k2*k8*(k4+k5)+k3*k5*(k1+k8);
E1=x1/(x1+x2+x3+x4);
E2=x2/(x1+x2+x3+x4);
E3=x3/(x1+x2+x3+x4);
E4=x4/(x1+x2+x3+x4);
KmCaAct=150.0e-6;
allo=1.0/(1.0+(KmCaAct/cass)^2.0);
JncxNa=3.0*(E4*k7-E1*k8)+E3*k4pp-E2*k3pp;
JncxCa=E2*k2-E1*k1;
INaCa_ss=0.2*Gncx*allo*(zna*JncxNa+zca*JncxCa);

%calculate INaK
k1p=949.5;
k1m=182.4;
k2p=687.2;
k2m=39.4;
k3p=1899.0;
k3m=79300.0;
k4p=639.0;
k4m=40.0;
Knai0=9.073;
Knao0=27.78;
delta=-0.1550;
Knai=Knai0*exp((delta*v*F)/(3.0*R*T));
Knao=Knao0*exp(((1.0-delta)*v*F)/(3.0*R*T));
Kki=0.5;
Kko=0.3582;
MgADP=0.05;
MgATP=9.8;
Kmgatp=1.698e-7;
H=1.0e-7;
eP=4.2;
Khp=1.698e-7;
Knap=224.0;
Kxkur=292.0;
P=eP/(1.0+H/Khp+nai/Knap+ki/Kxkur);
a1=(k1p*(nai/Knai)^3.0)/((1.0+nai/Knai)^3.0+(1.0+ki/Kki)^2.0-1.0);
b1=k1m*MgADP;
a2=k2p;
b2=(k2m*(nao/Knao)^3.0)/((1.0+nao/Knao)^3.0+(1.0+ko/Kko)^2.0-1.0);
a3=(k3p*(ko/Kko)^2.0)/((1.0+nao/Knao)^3.0+(1.0+ko/Kko)^2.0-1.0);
b3=(k3m*P*H)/(1.0+MgATP/Kmgatp);
a4=(k4p*MgATP/Kmgatp)/(1.0+MgATP/Kmgatp);
b4=(k4m*(ki/Kki)^2.0)/((1.0+nai/Knai)^3.0+(1.0+ki/Kki)^2.0-1.0);
x1=a4*a1*a2+b2*b4*b3+a2*b4*b3+b3*a1*a2;
x2=b2*b1*b4+a1*a2*a3+a3*b1*b4+a2*a3*b4;
x3=a2*a3*a4+b3*b2*b1+b2*b1*a4+a3*a4*b1;
x4=b4*b3*b2+a3*a4*a1+b2*a4*a1+b3*b2*a1;
E1=x1/(x1+x2+x3+x4);
E2=x2/(x1+x2+x3+x4);
E3=x3/(x1+x2+x3+x4);
E4=x4/(x1+x2+x3+x4);
zk=1.0;
JnakNa=3.0*(E1*a3-E2*b3);
JnakK=2.0*(E4*b1-E3*a1);
Pnak=30;
if celltype==1
    Pnak=Pnak*0.9;
elseif celltype==2
    Pnak=Pnak*0.7;
end
INaK=Pnak*(zna*JnakNa+zk*JnakK);

%calculate IKb
xkb=1.0/(1.0+exp(-(v-14.48)/18.34));
GKb=0.003;
if celltype==1
    GKb=GKb*0.6;
end
IKb=GKb*xkb*(v-EK);

%calculate INab
PNab=3.75e-10;
INab=PNab*vffrt*(nai*exp(vfrt)-nao)/(exp(vfrt)-1.0);

%calculate ICab
PCab=2.5e-8;
ICab=PCab*4.0*vffrt*(cai*exp(2.0*vfrt)-0.341*cao)/(exp(2.0*vfrt)-1.0);

%calculate IpCa
GpCa=0.0005;
IpCa=GpCa*cai/(0.0005+cai);

%%%%%%%%%%%%%%%%%%%%%%%%%%%%%%%%%%%%%%%%%%%%%%%%%%%%%%%%%%%%%%%%%%%%%%%

%calculate the stimulus current, Istim
amp=-80.0;
duration=0.5;

if (t-floor(t/CL)*CL <= duration)  && (t-floor(t/CL)*CL >0)
    Istim=amp;
else 
    Istim=0;
end

%udtate the membrane voltage
dv=-(INa+INaL+Ito+ICaL+ICaNa+ICaK+IKr+IKs+IK1+INaCa_i+INaCa_ss+INaK+INab+IKb+IpCa+ICab+Istim);


%calculate diffusion fluxes
JdiffNa=(nass-nai)/2.0;
JdiffK=(kss-ki)/2.0;
Jdiff=(cass-cai)/0.2;

%calculate ryanodione receptor calcium induced calcium release from the jsr
bt=4.75;
a_rel=0.5*bt;
Jrel_inf=a_rel*(-ICaL)/(1.0+(1.5/cajsr)^8.0);
if celltype==2
    Jrel_inf=Jrel_inf*1.7;
end
tau_rel=2*bt/(1.0+0.0123/cajsr);

if tau_rel<0.001
   tau_rel=0.001; 
end
dJrelnp=(Jrel_inf-Jrelnp)/tau_rel;
btp=1.25*bt;
a_relp=0.5*btp;
Jrel_infp=a_relp*(-ICaL)/(1.0+(1.5/cajsr)^8.0);
if celltype==2
    Jrel_infp=Jrel_infp*1.7;
end
tau_relp=2*btp/(1.0+0.0123/cajsr);
if tau_relp<0.001
   tau_relp=0.001; 
end

dJrelp=(Jrel_infp-Jrelp)/tau_relp;
fJrelp=(1.0/(1.0+KmCaMK/CaMKa));
Jrel=(1.0-fJrelp)*Jrelnp+fJrelp*Jrelp;

%calculate serca pump, ca uptake flux
Jupnp=0.004375*cai/(cai+0.00092);
Jupp=2.75*0.004375*cai/(cai+0.00092-0.00017);
if celltype==1
    Jupnp=Jupnp*1.3;
    Jupp=Jupp*1.3;
end
fJupp=(1.0/(1.0+KmCaMK/CaMKa));
% Jup=(1.0-fJupp)*Jupnp+fJupp*Jupp-Jleak; %%%original equation in Ord model
Jleak=0.0039375*cansr/15.0;
Jup = 0.00179*vcycle-Jleak; %%% calculate Jup by using the cycle rate after adding the SERCA three-state model
%calculate tranlocation flux
Jtr=(cansr-cajsr)/100.0;

%calcium buffer constants
cmdnmax=0.05;
if celltype==1
    cmdnmax=cmdnmax*1.3;
end
kmcmdn=0.00238;
trpnmax=0.07;
kmtrpn=0.0005;
BSRmax=0.047;
KmBSR=0.00087;
BSLmax=1.124;
KmBSL=0.0087;
csqnmax=10.0;
kmcsqn=0.8;

%update intracellular concentrations, using buffers for cai, cass, cajsr
dnai=-(INa+INaL+3.0*INaCa_i+3.0*INaK+INab)*Acap/(F*vmyo)+JdiffNa*vss/vmyo;
dnass=-(ICaNa+3.0*INaCa_ss)*Acap/(F*vss)-JdiffNa;

dki=-(Ito+IKr+IKs+IK1+IKb+Istim-2.0*INaK)*Acap/(F*vmyo)+JdiffK*vss/vmyo;
dkss=-(ICaK)*Acap/(F*vss)-JdiffK;

Bcai=1.0/(1.0+cmdnmax*kmcmdn/(kmcmdn+cai)^2.0+trpnmax*kmtrpn/(kmtrpn+cai)^2.0);
dcai=Bcai*(-(IpCa+ICab-2.0*INaCa_i)*Acap/(2.0*F*vmyo)-Jup*vnsr/vmyo+Jdiff*vss/vmyo);

Bcass=1.0/(1.0+BSRmax*KmBSR/(KmBSR+cass)^2.0+BSLmax*KmBSL/(KmBSL+cass)^2.0);
dcass=Bcass*(-(ICaL-2.0*INaCa_ss)*Acap/(2.0*F*vss)+Jrel*vjsr/vss-Jdiff);

dcansr=Jup-Jtr*vjsr/vnsr;

Bcajsr=1.0/(1.0+csqnmax*kmcsqn/(kmcsqn+cajsr)^2.0);
dcajsr=Bcajsr*(Jtr-Jrel);

cajsr_buff = csqnmax*(cajsr/(cajsr+kmcsqn));

%%%%%%%%%%%%%%%%%%%%%%%%%%%%%%%%%%%%%%%%%%%%%%%%%%%%%%%%%%%%%%%%%%%%%%%%%%%%%%%%%%%%%%%%%%%%%%%%%%%%%%%%%%%%%%%%%%%%%%%%%%%%%%%%%%%%%%%%%%%%%%%%%%%%%%%%%%%%%%%%%%%%%
%output the state venctor when ode_flag==1, and the calculated currents and fluxes otherwise
if flag_ode==1
   output=[dv dnai dnass dki dkss dcai dcass dcansr dcajsr dm dhf dhs dj dhsp djp dmL dhL dhLp da diF diS dap diFp diSp dd dff dfs dfcaf dfcas djca dnca dffp dfcafp dxrf dxrs dxs1 dxs2 dxk1 dJrelnp dJrelp dCaMKt]';

else
    output=[INa INaL Ito ICaL IKr IKs IK1 INaCa_i INaCa_ss INaK  IKb INab ICab IpCa Jdiff JdiffNa JdiffK Jup Jleak Jtr Jrel CaMKa Istim cajsr_buff]';
end
