# Supplementary material for: Exploring Impaired SERCA Pump-Caused Alternation Occurrence in Ischemia
Source: Comput Math Methods Med. 2019 Nov 12;2019:8237071. doi: 10.1155/2019/8237071 (PMC6885202; doi:10.1155/2019/8237071)
Supplement: Supplementary Materials — Our supplementary files include the modified human ventricular cell model, codes, and data for plotting figures in our papers. [file 8237071.f1.zip › 8237071.f1/pdf format/supplementary material_data.xlsx]

## Sheet: A11
0	-87.0753	0.000373088	3.60024	6.41673e-07	5.28753e-06	-2.59279e-07
0.378056	-57.1474	0.000372883	3.60034	1.02057e-06	0.00268299	-1.52614e-05
0.826432	-44.4535	0.000372643	3.60047	6.98366e-05	0.0100476	-0.000828169
1.2527	-14.3597	0.000372422	3.60057	0.00123663	0.0383393	-0.0500817
1.63715	23.9823	0.000372287	3.59881	0.171601	0.536837	-1.83202
2.06093	26.8474	0.000372299	3.58631	0.59538	1.23526	-2.77041
2.48472	28.9015	0.000372758	3.55855	1.04328	1.82566	-2.97304
2.9085	30.2755	0.000374148	3.51744	1.36569	2.29426	-2.90836
3.33229	31.0908	0.00037713	3.46884	1.4839	2.64187	-2.74479
3.75607	31.4673	0.000382544	3.41914	1.45048	2.87933	-2.53795
4.17986	31.5022	0.00039144	3.37171	1.36315	3.02242	-2.30188
4.60364	31.2669	0.000405168	3.32749	1.26688	3.08805	-2.0394
5.02742	30.8151	0.000425304	3.28654	1.17385	3.09214	-1.76699
5.45121	30.1972	0.000453199	3.24869	1.08667	3.04906	-1.53154
5.87499	29.4743	0.000489225	3.21377	1.00558	2.97181	-1.3915
6.29878	28.7164	0.000532461	3.18159	0.930288	2.87198	-1.36939
6.72256	27.9842	0.000581212	3.15197	0.860407	2.75927	-1.43998
7.14635	27.3171	0.000633754	3.12474	0.795543	2.64106	-1.56087
7.57013	26.7337	0.000688707	3.09974	0.735323	2.52253	-1.69788
7.99392	26.2384	0.000745076	3.07682	0.679402	2.40706	-1.83077
8.4177	25.8279	0.000802156	3.05582	0.627455	2.29673	-1.94984
8.84148	25.4948	0.000859442	3.03661	0.579183	2.19267	-2.05158
9.26527	25.2306	0.000916553	3.01907	0.534306	2.09538	-2.13568
9.68905	25.0264	0.000973196	3.00307	0.492564	2.00497	-2.20335
10.1128	24.8741	0.00102913	2.98851	0.453714	1.92125	-2.25637
10.5366	24.7661	0.00108416	2.97528	0.417531	1.84391	-2.29665
10.9604	24.6956	0.00113812	2.96329	0.383802	1.77251	-2.32605
11.3842	24.6567	0.00119085	2.95246	0.352327	1.7066	-2.34625
11.808	24.6443	0.00124225	2.9427	0.32292	1.6457	-2.35872
12.2318	24.654	0.0012922	2.93395	0.295401	1.58936	-2.36474
12.6555	24.6818	0.00134061	2.92614	0.269601	1.53712	-2.36544
13.0793	24.7245	0.00138739	2.91921	0.245357	1.48859	-2.36173
13.5031	24.7793	0.00143249	2.9131	0.222512	1.44338	-2.35442
13.9269	24.8437	0.00147585	2.90777	0.200913	1.40115	-2.34418
14.3507	24.9158	0.0015174	2.90318	0.180411	1.36159	-2.33159
14.7745	24.9936	0.00155711	2.89929	0.160864	1.32443	-2.31713
15.1983	25.0758	0.00159495	2.89607	0.142141	1.28942	-2.3012
15.622	25.161	0.00163089	2.89348	0.124135	1.25635	-2.28414
16.0458	25.2482	0.00166489	2.89151	0.106785	1.22502	-2.26624
16.4696	25.3365	0.00169694	2.89013	0.0901249	1.19526	-2.24773
16.8934	25.4252	0.00172703	2.88931	0.0743369	1.16693	-2.22876
17.3172	25.5134	0.00175515	2.88902	0.0597882	1.13989	-2.20945
17.741	25.6006	0.00178132	2.8892	0.0469707	1.11402	-2.18984
18.1647	25.6863	0.00180557	2.8898	0.0362988	1.08923	-2.16994
18.5885	25.7701	0.00182796	2.89072	0.0278886	1.06543	-2.14973
19.0123	25.8514	0.00184857	2.89189	0.021522	1.04253	-2.12923
19.4361	25.9299	0.00186749	2.89327	0.0167978	1.02046	-2.10848
19.8599	26.0053	0.00188481	2.89478	0.0133017	0.99917	-2.08756
20.2837	26.0774	0.00190063	2.8964	0.0106922	0.978593	-2.06655
20.7074	26.146	0.00191505	2.89811	0.00871664	0.958683	-2.04554
21.1312	26.2109	0.00192816	2.89988	0.0071966	0.939398	-2.02461
21.555	26.2721	0.00194006	2.90169	0.00600801	0.920699	-2.00383
21.9788	26.3295	0.00195081	2.90355	0.0050644	0.902555	-1.98326
22.4026	26.3832	0.00196049	2.90544	0.00430489	0.884933	-1.96293
22.8264	26.433	0.00196917	2.90735	0.003686	0.867809	-1.9429
23.2502	26.4791	0.00197692	2.90928	0.00317615	0.851159	-1.92318
23.6739	26.5215	0.00198379	2.91124	0.00275205	0.83496	-1.9038
24.0977	26.5602	0.00198984	2.9132	0.00239624	0.819195	-1.88478
24.5215	26.5954	0.00199511	2.91518	0.00209547	0.803844	-1.86611
24.9453	26.627	0.00199966	2.91717	0.00183951	0.788892	-1.84783
25.3691	26.6551	0.00200353	2.91917	0.00162036	0.774325	-1.82991
25.7929	26.6798	0.00200675	2.92118	0.00143172	0.760127	-1.81237
26.2166	26.7012	0.00200936	2.92319	0.00126856	0.746287	-1.7952
26.6404	26.7194	0.00201141	2.92521	0.00112683	0.732792	-1.77841
27.0642	26.7344	0.00201292	2.92724	0.00100323	0.71963	-1.76198
27.488	26.7463	0.00201392	2.92927	0.000895049	0.70679	-1.74592
27.9118	26.7552	0.00201444	2.9313	0.000800066	0.694263	-1.7302
28.3356	26.7612	0.00201451	2.93334	0.000716422	0.682038	-1.71484
28.7594	26.7643	0.00201415	2.93537	0.000642564	0.670106	-1.69982
29.1831	26.7646	0.0020134	2.93741	0.000577185	0.658458	-1.68513
29.6069	26.7622	0.00201226	2.93946	0.000519178	0.647084	-1.67077
30.0307	26.7572	0.00201076	2.9415	0.000467605	0.635977	-1.65672
30.4545	26.7495	0.00200893	2.94354	0.000421663	0.625128	-1.64299
30.8783	26.7393	0.00200677	2.94559	0.000380662	0.61453	-1.62955
31.3021	26.7267	0.00200431	2.94763	0.000344009	0.604174	-1.61641
31.7258	26.7117	0.00200157	2.94968	0.000311192	0.594054	-1.60356
32.1496	26.6943	0.00199855	2.95172	0.000281767	0.584163	-1.59099
32.5734	26.6746	0.00199528	2.95377	0.000255346	0.574493	-1.57868
32.9972	26.6527	0.00199177	2.95582	0.000231594	0.565038	-1.56664
33.421	26.6286	0.00198803	2.95786	0.000210214	0.555791	-1.55486
33.8448	26.6024	0.00198408	2.95991	0.000190948	0.546746	-1.54332
34.2686	26.5742	0.00197992	2.96195	0.000173568	0.537898	-1.53203
34.6923	26.5439	0.00197558	2.96399	0.000157874	0.52924	-1.52097
35.1161	26.5116	0.00197105	2.96603	0.00014369	0.520767	-1.51013
35.5399	26.4774	0.00196635	2.96808	0.000130857	0.512473	-1.49952
35.9637	26.4413	0.0019615	2.97012	0.000119239	0.504354	-1.48913
36.3875	26.4033	0.00195649	2.97215	0.00010871	0.496403	-1.47894
36.8113	26.3636	0.00195134	2.97419	9.91628e-05	0.488617	-1.46896
37.235	26.3221	0.00194605	2.97623	9.04983e-05	0.480989	-1.45917
37.6588	26.2789	0.00194064	2.97826	8.26299e-05	0.473517	-1.44958
38.0826	26.234	0.00193511	2.9803	7.54796e-05	0.466195	-1.44017
38.5064	26.1874	0.00192947	2.98233	6.89778e-05	0.459018	-1.43094
38.9302	26.1392	0.00192372	2.98436	6.30622e-05	0.451984	-1.42189
39.354	26.0895	0.00191788	2.98639	5.76769e-05	0.445088	-1.41301
39.7778	26.0382	0.00191195	2.98841	5.27716e-05	0.438325	-1.4043
40.2015	25.9854	0.00190593	2.99044	4.83012e-05	0.431693	-1.39574
40.6253	25.9311	0.00189983	2.99246	4.42251e-05	0.425188	-1.38735
41.0491	25.8753	0.00189365	2.99448	4.05067e-05	0.418806	-1.3791
41.4729	25.8182	0.00188741	2.9965	3.71131e-05	0.412543	-1.371
41.8967	25.7596	0.0018811	2.99852	3.40146e-05	0.406398	-1.36305
42.3205	25.6997	0.00187473	3.00053	3.11842e-05	0.400366	-1.35524
42.7442	25.6384	0.00186831	3.00254	2.85978e-05	0.394444	-1.34756
43.168	25.5758	0.00186183	3.00455	2.62333e-05	0.38863	-1.34001
43.5918	25.5119	0.00185531	3.00656	2.40709e-05	0.382921	-1.3326
44.0156	25.4468	0.00184874	3.00857	2.20926e-05	0.377314	-1.3253
44.4394	25.3804	0.00184213	3.01057	2.02821e-05	0.371806	-1.31813
44.8632	25.3128	0.00183549	3.01257	1.86246e-05	0.366395	-1.31108
45.2869	25.244	0.00182881	3.01457	1.71066e-05	0.361079	-1.30414
45.7107	25.174	0.00182211	3.01657	1.57161e-05	0.355855	-1.29731
46.1345	25.1029	0.00181537	3.01856	1.44418e-05	0.35072	-1.2906
46.5583	25.0306	0.00180861	3.02055	1.32737e-05	0.345673	-1.28399
46.9821	24.9572	0.00180184	3.02254	1.22027e-05	0.340712	-1.27748
47.4059	24.8827	0.00179504	3.02452	1.12205e-05	0.335835	-1.27107
47.8297	24.8071	0.00178822	3.02651	1.03193e-05	0.331038	-1.26475
48.2534	24.7304	0.00178139	3.02849	9.49243e-06	0.326322	-1.25854
48.6772	24.6527	0.00177455	3.03047	8.73344e-06	0.321683	-1.25241
49.101	24.5739	0.0017677	3.03244	8.0366e-06	0.317119	-1.24638
49.5248	24.4942	0.00176085	3.03442	7.3967e-06	0.312631	-1.24043
49.9486	24.4134	0.00175398	3.03639	6.80893e-06	0.308214	-1.23457
50.3724	24.3316	0.00174712	3.03835	6.26893e-06	0.303869	-1.22879
50.7961	24.2489	0.00174025	3.04032	5.77271e-06	0.299592	-1.22309
51.2199	24.1652	0.00173338	3.04228	5.31662e-06	0.295384	-1.21746
51.6437	24.0805	0.00172651	3.04424	4.89734e-06	0.291242	-1.21192
52.0675	23.9949	0.00171965	3.04619	4.51182e-06	0.287164	-1.20645
52.4913	23.9084	0.00171279	3.04815	4.15727e-06	0.283151	-1.20105
52.9151	23.8209	0.00170593	3.05009	3.83114e-06	0.279199	-1.19572
53.3389	23.7325	0.00169909	3.05204	3.5311e-06	0.275308	-1.19046
53.7626	23.6433	0.00169225	3.05399	3.25501e-06	0.271477	-1.18526
54.1864	23.5531	0.00168542	3.05593	3.00093e-06	0.267704	-1.18013
54.6102	23.4621	0.0016786	3.05786	2.76705e-06	0.263988	-1.17507
55.034	23.3701	0.00167179	3.0598	2.55173e-06	0.260329	-1.17006
55.4578	23.2774	0.001665	3.06173	2.35347e-06	0.256724	-1.16511
55.8816	23.1837	0.00165822	3.06366	2.1709e-06	0.253173	-1.16022
56.3053	23.0893	0.00165146	3.06558	2.00274e-06	0.249675	-1.15539
56.7291	22.9939	0.00164471	3.06751	1.84784e-06	0.246229	-1.15062
57.1529	22.8978	0.00163797	3.06943	1.70513e-06	0.242833	-1.14589
57.5767	22.8008	0.00163126	3.07134	1.57363e-06	0.239488	-1.14122
58.0005	22.703	0.00162456	3.07325	1.45245e-06	0.236191	-1.1366
58.4243	22.6044	0.00161788	3.07516	1.34077e-06	0.232942	-1.13202
58.8481	22.5049	0.00161122	3.07707	1.23782e-06	0.22974	-1.1275
59.2718	22.4047	0.00160459	3.07897	1.14292e-06	0.226584	-1.12302
59.6956	22.3036	0.00159797	3.08087	1.05543e-06	0.223474	-1.11859
60.1194	22.2018	0.00159137	3.08277	9.74761e-07	0.220408	-1.11419
60.5432	22.0992	0.0015848	3.08466	9.00373e-07	0.217386	-1.10985
60.967	21.9957	0.00157825	3.08655	8.31773e-07	0.214407	-1.10554
61.3908	21.8915	0.00157172	3.08844	7.68506e-07	0.21147	-1.10127
61.8145	21.7865	0.00156521	3.09032	7.10154e-07	0.208575	-1.09704
62.2383	21.6808	0.00155873	3.0922	6.56332e-07	0.20572	-1.09285
62.6621	21.5742	0.00155227	3.09407	6.06687e-07	0.202905	-1.08869
63.0859	21.4669	0.00154584	3.09595	5.60893e-07	0.20013	-1.08457
63.5097	21.3587	0.00153943	3.09782	5.18652e-07	0.197393	-1.08049
63.9335	21.2499	0.00153305	3.09968	4.79687e-07	0.194695	-1.07643
64.3572	21.1402	0.00152669	3.10154	4.43746e-07	0.192033	-1.07241
64.781	21.0298	0.00152036	3.1034	4.10596e-07	0.189409	-1.06842
65.2048	20.9186	0.00151406	3.10526	3.80021e-07	0.18682	-1.06446
65.6286	20.8066	0.00150778	3.10711	3.51826e-07	0.184267	-1.06052
66.0524	20.6939	0.00150153	3.10895	3.25827e-07	0.18175	-1.05662
66.4762	20.5803	0.00149531	3.1108	3.01859e-07	0.179266	-1.05274
66.9	20.4661	0.00148911	3.11264	2.79768e-07	0.176816	-1.04889
67.3237	20.351	0.00148295	3.11447	2.59411e-07	0.1744	-1.04506
67.7475	20.2352	0.00147681	3.11631	2.4066e-07	0.172016	-1.04125
68.1713	20.1186	0.00147069	3.11814	2.23393e-07	0.169664	-1.03747
68.5951	20.0012	0.00146461	3.11996	2.07502e-07	0.167345	-1.03371
69.0189	19.883	0.00145855	3.12178	1.92884e-07	0.165056	-1.02997
69.4427	19.7641	0.00145252	3.1236	1.79447e-07	0.162798	-1.02624
69.8664	19.6443	0.00144652	3.12542	1.67104e-07	0.16057	-1.02254
70.2902	19.5238	0.00144055	3.12723	1.55778e-07	0.158372	-1.01886
70.714	19.4025	0.00143461	3.12903	1.45397e-07	0.156204	-1.01519
71.1378	19.2804	0.0014287	3.13084	1.35893e-07	0.154064	-1.01154
71.5616	19.1575	0.00142281	3.13264	1.27205e-07	0.151952	-1.0079
71.9854	19.0338	0.00141696	3.13443	1.19279e-07	0.149869	-1.00428
72.4092	18.9094	0.00141113	3.13622	1.12063e-07	0.147812	-1.00067
72.8329	18.7841	0.00140533	3.13801	1.05511e-07	0.145783	-0.997073
73.2567	18.658	0.00139956	3.13979	9.95784e-08	0.143781	-0.993488
73.6805	18.531	0.00139382	3.14157	9.42277e-08	0.141805	-0.989914
74.1043	18.4033	0.00138811	3.14335	8.94228e-08	0.139855	-0.986349
74.5281	18.2747	0.00138243	3.14512	8.51315e-08	0.13793	-0.982793
74.9519	18.1453	0.00137678	3.14689	8.13242e-08	0.13603	-0.979244
75.3756	18.0151	0.00137115	3.14866	7.79745e-08	0.134155	-0.975703
75.7994	17.884	0.00136556	3.15042	7.50581e-08	0.132305	-0.972168
76.2232	17.7521	0.00135999	3.15217	7.25534e-08	0.130478	-0.968638
76.647	17.6193	0.00135446	3.15392	7.04411e-08	0.128675	-0.965113
77.0708	17.4856	0.00134895	3.15567	6.87038e-08	0.126895	-0.961591
77.4946	17.3511	0.00134347	3.15742	6.73261e-08	0.125138	-0.958071
77.9184	17.2157	0.00133802	3.15916	6.62946e-08	0.123403	-0.954554
78.3421	17.0794	0.0013326	3.16089	6.55974e-08	0.121691	-0.951037
78.7659	16.9422	0.00132721	3.16263	6.52245e-08	0.120001	-0.947519
79.1897	16.8041	0.00132185	3.16435	6.5167e-08	0.118332	-0.944001
79.6135	16.6652	0.00131651	3.16608	6.5418e-08	0.116685	-0.940481
80.0373	16.5252	0.00131121	3.1678	6.59715e-08	0.115058	-0.936958
80.4611	16.3844	0.00130593	3.16952	6.6823e-08	0.113452	-0.933431
80.8848	16.2426	0.00130069	3.17123	6.79693e-08	0.111866	-0.929899
81.3086	16.0999	0.00129547	3.17294	6.94082e-08	0.110301	-0.926361
81.7324	15.9562	0.00129028	3.17464	7.11388e-08	0.108755	-0.922817
82.1562	15.8116	0.00128511	3.17634	7.31612e-08	0.107228	-0.919265
82.58	15.6659	0.00127998	3.17803	7.54765e-08	0.10572	-0.915704
83.0038	15.5193	0.00127487	3.17973	7.80869e-08	0.104231	-0.912133
83.4275	15.3717	0.0012698	3.18141	8.09954e-08	0.10276	-0.908552
83.8513	15.2231	0.00126475	3.1831	8.42061e-08	0.101306	-0.904959
84.2751	15.0734	0.00125972	3.18478	8.7724e-08	0.0998678	-0.901354
84.6989	14.9227	0.00125473	3.18645	9.15548e-08	0.0984428	-0.897734
85.1227	14.771	0.00124976	3.18812	9.57052e-08	0.0970264	-0.894099
85.5465	14.6182	0.00124482	3.18979	1.00183e-07	0.0956107	-0.890448
85.9703	14.4643	0.00123991	3.19145	1.04996e-07	0.0941817	-0.88678
86.394	14.3094	0.00123503	3.19311	1.10154e-07	0.0927202	-0.883093
86.8178	14.1534	0.00123017	3.19476	1.15667e-07	0.0912065	-0.879386
87.2416	13.9965	0.00122534	3.19641	1.21546e-07	0.0896331	-0.875657
87.6654	13.8385	0.00122054	3.19806	1.27802e-07	0.0880118	-0.871906
88.0892	13.6794	0.00121577	3.1997	1.34448e-07	0.0863666	-0.86813
88.513	13.5194	0.00121102	3.20133	1.41496e-07	0.0847198	-0.864328
88.9367	13.3583	0.0012063	3.20297	1.4896e-07	0.0830863	-0.8605
89.3605	13.1962	0.0012016	3.20459	1.56855e-07	0.0814744	-0.856644
89.7843	13.033	0.00119694	3.20622	1.65195e-07	0.0798879	-0.85276
90.2081	12.8688	0.00119229	3.20784	1.73998e-07	0.0783286	-0.848845
90.6319	12.7034	0.00118768	3.20945	1.8328e-07	0.0767968	-0.844899
91.0557	12.5368	0.00118309	3.21106	1.93058e-07	0.0752924	-0.840921
91.4795	12.3691	0.00117852	3.21267	2.03352e-07	0.0738153	-0.836909
91.9032	12.2002	0.00117399	3.21427	2.14179e-07	0.0723649	-0.832862
92.327	12.03	0.00116948	3.21587	2.25561e-07	0.0709408	-0.828779
92.7508	11.8586	0.00116499	3.21746	2.37517e-07	0.0695425	-0.824657
93.1746	11.6859	0.00116053	3.21905	2.5007e-07	0.0681694	-0.820496
93.5984	11.5119	0.00115609	3.22064	2.6324e-07	0.0668212	-0.816294
94.0222	11.3366	0.00115168	3.22222	2.7705e-07	0.0654974	-0.812049
94.4459	11.1599	0.0011473	3.2238	2.91525e-07	0.0641974	-0.807759
94.8697	10.9818	0.00114294	3.22537	3.06688e-07	0.0629208	-0.803423
95.2935	10.8023	0.0011386	3.22693	3.22564e-07	0.0616673	-0.799038
95.7173	10.6213	0.00113429	3.2285	3.39179e-07	0.0604362	-0.794603
96.1411	10.4388	0.00113001	3.23006	3.56558e-07	0.0592273	-0.790116
96.5649	10.2548	0.00112575	3.23161	3.74728e-07	0.05804	-0.785573
96.9887	10.0693	0.00112151	3.23316	3.93716e-07	0.056874	-0.780975
97.4124	9.88214	0.0011173	3.23471	4.13551e-07	0.0557289	-0.776316
97.8362	9.69338	0.00111311	3.23625	4.3426e-07	0.0546043	-0.771596
98.26	9.50296	0.00110894	3.23778	4.55872e-07	0.0534998	-0.766812
98.6838	9.31084	0.0011048	3.23932	4.78417e-07	0.052415	-0.761961
99.1076	9.11699	0.00110068	3.24085	5.01924e-07	0.0513495	-0.75704
99.5314	8.92137	0.00109659	3.24237	5.26423e-07	0.050303	-0.752045
99.9551	8.72393	0.00109252	3.24389	5.51943e-07	0.0492752	-0.746975
100.379	8.52463	0.00108847	3.2454	5.78515e-07	0.0482656	-0.741826
100.803	8.32344	0.00108445	3.24691	6.06169e-07	0.0472739	-0.736594
101.226	8.1203	0.00108045	3.24842	6.34936e-07	0.0462998	-0.731276
101.65	7.91518	0.00107647	3.24992	6.64844e-07	0.045343	-0.725868
102.074	7.70802	0.00107251	3.25142	6.95924e-07	0.0444031	-0.720367
102.498	7.49878	0.00106858	3.25291	7.28205e-07	0.0434798	-0.714767
102.922	7.2874	0.00106467	3.2544	7.61715e-07	0.0425729	-0.709065
103.345	7.07384	0.00106078	3.25588	7.96483e-07	0.0416819	-0.703256
103.769	6.85804	0.00105691	3.25736	8.32534e-07	0.0408066	-0.697336
104.193	6.63994	0.00105306	3.25884	8.69894e-07	0.0399467	-0.6913
104.617	6.41949	0.00104924	3.26031	9.08587e-07	0.0391019	-0.685142
105.041	6.19663	0.00104544	3.26177	9.48636e-07	0.0382719	-0.678857
105.464	5.97128	0.00104166	3.26323	9.90061e-07	0.0374564	-0.672439
105.888	5.7434	0.0010379	3.26469	1.03288e-06	0.0366552	-0.665883
106.312	5.51291	0.00103416	3.26614	1.07711e-06	0.0358679	-0.659182
106.736	5.27973	0.00103045	3.26759	1.12275e-06	0.0350943	-0.65233
107.159	5.04381	0.00102675	3.26904	1.16983e-06	0.0343342	-0.645321
107.583	4.80506	0.00102307	3.27048	1.21834e-06	0.0335873	-0.638147
108.007	4.5634	0.00101942	3.27191	1.26829e-06	0.0328533	-0.630801
108.431	4.31876	0.00101578	3.27334	1.31966e-06	0.0321319	-0.623276
108.855	4.07104	0.00101217	3.27477	1.37246e-06	0.031423	-0.615564
109.278	3.82017	0.00100858	3.27619	1.42666e-06	0.0307262	-0.607658
109.702	3.56604	0.001005	3.27761	1.48223e-06	0.0300414	-0.599549
110.126	3.30857	0.00100145	3.27902	1.53916e-06	0.0293683	-0.59123
110.55	3.04766	0.000997914	3.28043	1.59739e-06	0.0287067	-0.582692
110.974	2.7832	0.000994399	3.28183	1.65689e-06	0.0280563	-0.573926
111.397	2.5151	0.000990904	3.28323	1.71759e-06	0.027417	-0.564926
111.821	2.24324	0.000987427	3.28462	1.77943e-06	0.0267884	-0.555682
112.245	1.96751	0.00098397	3.28601	1.84232e-06	0.0261705	-0.546187
112.669	1.6878	0.000980532	3.2874	1.90617e-06	0.025563	-0.536433
113.092	1.40398	0.000977112	3.28878	1.97087e-06	0.0249658	-0.526414
113.516	1.11595	0.000973711	3.29016	2.03631e-06	0.0243785	-0.516122
113.94	0.823583	0.000970329	3.29153	2.10235e-06	0.0238011	-0.505553
114.364	0.526746	0.000966964	3.2929	2.16884e-06	0.0232334	-0.494701
114.788	0.225318	0.000963618	3.29426	2.2356e-06	0.0226752	-0.483564
115.211	-0.0808269	0.00096029	3.29562	2.30246e-06	0.0221263	-0.47214
115.635	-0.391815	0.00095698	3.29697	2.3692e-06	0.0215866	-0.460429
116.059	-0.707771	0.000953687	3.29832	2.43562e-06	0.021056	-0.448432
116.483	-1.02882	0.000950412	3.29967	2.50145e-06	0.0205343	-0.436155
116.907	-1.35508	0.000947154	3.30101	2.56646e-06	0.0200214	-0.423605
117.33	-1.68666	0.000943914	3.30235	2.63036e-06	0.0195172	-0.410792
117.754	-2.02368	0.00094069	3.30368	2.69285e-06	0.0190217	-0.39773
118.178	-2.36624	0.000937483	3.30501	2.75363e-06	0.0185346	-0.384436
118.602	-2.71443	0.000934294	3.30633	2.81237e-06	0.0180561	-0.370932
119.025	-3.06833	0.00093112	3.30765	2.86873e-06	0.017586	-0.357243
119.449	-3.42802	0.000927963	3.30896	2.92238e-06	0.0171242	-0.343399
119.873	-3.79353	0.000924822	3.31027	2.97297e-06	0.0166709	-0.329434
120.297	-4.16491	0.000921698	3.31158	3.02013e-06	0.0162259	-0.315385
120.721	-4.54219	0.000918589	3.31288	3.06353e-06	0.0157893	-0.301296
121.144	-4.92534	0.000915497	3.31418	3.10282e-06	0.0153612	-0.287212
121.568	-5.31436	0.000912419	3.31547	3.13768e-06	0.0149415	-0.273181
121.992	-5.70918	0.000909358	3.31676	3.16781e-06	0.0145304	-0.259255
122.416	-6.10975	0.000906312	3.31804	3.19293e-06	0.0141279	-0.245487
122.84	-6.51596	0.000903281	3.31932	3.21282e-06	0.0137341	-0.23193
123.263	-6.92769	0.000900265	3.32059	3.22728e-06	0.0133492	-0.218638
123.687	-7.3448	0.000897264	3.32186	3.23615e-06	0.0129732	-0.205662
124.111	-7.76711	0.000894279	3.32313	3.23937e-06	0.0126062	-0.193053
124.535	-8.19444	0.000891308	3.32439	3.23688e-06	0.0122485	-0.180855
124.958	-8.62657	0.000888352	3.32564	3.22874e-06	0.0119002	-0.169111
125.382	-9.06329	0.00088541	3.3269	3.21503e-06	0.0115613	-0.157857
125.806	-9.50433	0.000882483	3.32814	3.19593e-06	0.0112321	-0.147124
126.23	-9.94945	0.00087957	3.32939	3.17165e-06	0.0109127	-0.136936
126.654	-10.3984	0.000876672	3.33063	3.14248e-06	0.0106032	-0.127312
127.077	-10.8508	0.000873788	3.33186	3.10876e-06	0.0103037	-0.118261
127.501	-11.3066	0.000870918	3.33309	3.07088e-06	0.0100144	-0.10979
127.925	-11.7653	0.000868062	3.33432	3.02926e-06	0.00973541	-0.101895
128.349	-12.2267	0.000865221	3.33554	2.98437e-06	0.00946679	-0.0945708
128.772	-12.6905	0.000862393	3.33675	2.93668e-06	0.00920863	-0.0878033
129.196	-13.1565	0.00085958	3.33797	2.88669e-06	0.00896103	-0.0815755
129.62	-13.6244	0.00085678	3.33917	2.83491e-06	0.00872403	-0.0758659
130.044	-14.094	0.000853994	3.34038	2.78183e-06	0.00849768	-0.0706496
130.468	-14.5651	0.000851222	3.34158	2.72794e-06	0.00828202	-0.0658991
130.891	-15.0373	0.000848464	3.34277	2.67372e-06	0.00807705	-0.0615849
131.315	-15.5106	0.00084572	3.34396	2.61959e-06	0.0078828	-0.0576761
131.739	-15.9847	0.00084299	3.34515	2.56599e-06	0.00769924	-0.0541409
132.163	-16.4594	0.000840273	3.34633	2.51328e-06	0.00752636	-0.0509473
132.587	-16.9346	0.00083757	3.3475	2.46181e-06	0.00736412	-0.0480635
133.01	-17.4102	0.00083488	3.34868	2.41188e-06	0.00721248	-0.0454584
133.434	-17.8859	0.000832205	3.34985	2.36373e-06	0.0070714	-0.0431017
133.858	-18.3618	0.000829543	3.35101	2.31757e-06	0.0069408	-0.0409646
134.282	-18.8376	0.000826894	3.35217	2.27357e-06	0.00682062	-0.0390198
134.705	-19.3133	0.000824259	3.35332	2.23183e-06	0.0067108	-0.0372418
135.129	-19.7888	0.000821638	3.35447	2.19241e-06	0.00661124	-0.0356071
135.553	-20.264	0.00081903	3.35562	2.15535e-06	0.00652187	-0.0340943
135.977	-20.7389	0.000816436	3.35676	2.12062e-06	0.0064426	-0.0326842
136.401	-21.2134	0.000813855	3.3579	2.08816e-06	0.00637334	-0.0313598
136.824	-21.6875	0.000811288	3.35903	2.05787e-06	0.00631399	-0.0301064
137.248	-22.1611	0.000808734	3.36016	2.02963e-06	0.00626447	-0.0289112
137.672	-22.6342	0.000806193	3.36129	2.0033e-06	0.00622467	-0.0277636
138.096	-23.1067	0.000803666	3.36241	1.97869e-06	0.0061945	-0.0266552
138.52	-23.5787	0.000801152	3.36352	1.95562e-06	0.00617386	-0.0255791
138.943	-24.05	0.000798651	3.36464	1.93388e-06	0.00616265	-0.0245299
139.367	-24.5208	0.000796164	3.36574	1.91327e-06	0.00616076	-0.0235041
139.791	-24.9909	0.00079369	3.36685	1.89357e-06	0.0061681	-0.0224991
140.215	-25.4604	0.000791229	3.36795	1.87459e-06	0.00618455	-0.0215133
140.638	-25.9292	0.000788781	3.36904	1.85611e-06	0.00621	-0.0205462
141.062	-26.3974	0.000786346	3.37013	1.83794e-06	0.00624433	-0.0195978
141.486	-26.8648	0.000783924	3.37122	1.81991e-06	0.00628743	-0.0186686
141.91	-27.3316	0.000781516	3.3723	1.80183e-06	0.00633915	-0.0177596
142.334	-27.7977	0.00077912	3.37338	1.78357e-06	0.00639937	-0.0168719
142.757	-28.263	0.000776737	3.37445	1.76499e-06	0.00646793	-0.0160068
143.181	-28.7276	0.000774367	3.37552	1.74598e-06	0.00654468	-0.0151655
143.605	-29.1914	0.00077201	3.37658	1.72642e-06	0.00662944	-0.0143492
144.029	-29.6545	0.000769666	3.37765	1.70625e-06	0.00672202	-0.013559
144.453	-30.1168	0.000767335	3.3787	1.6854e-06	0.00682222	-0.012796
144.876	-30.5784	0.000765016	3.37975	1.66382e-06	0.00692981	-0.012061
145.3	-31.0391	0.00076271	3.3808	1.64148e-06	0.00704454	-0.0113545
145.724	-31.4991	0.000760416	3.38185	1.61838e-06	0.00716615	-0.010677
146.148	-31.9583	0.000758135	3.38289	1.59449e-06	0.00729435	-0.0100287
146.571	-32.4167	0.000755867	3.38392	1.56984e-06	0.0074288	-0.00940974
146.995	-32.8744	0.000753611	3.38495	1.54444e-06	0.00756916	-0.00881989
147.419	-33.3312	0.000751367	3.38598	1.51833e-06	0.00771505	-0.00825889
147.843	-33.7872	0.000749136	3.387	1.49154e-06	0.00786604	-0.00772632
148.267	-34.2424	0.000746917	3.38802	1.46411e-06	0.00802169	-0.00722163
148.69	-34.6969	0.000744711	3.38904	1.43609e-06	0.00818151	-0.00674414
149.114	-35.1506	0.000742516	3.39005	1.40755e-06	0.00834498	-0.0062931
149.538	-35.6035	0.000740334	3.39106	1.37853e-06	0.00851153	-0.00586768
149.962	-36.0556	0.000738164	3.39206	1.34911e-06	0.00868057	-0.00546699
150.385	-36.507	0.000736006	3.39306	1.31933e-06	0.00885145	-0.00509008
150.809	-36.9577	0.000733859	3.39405	1.28926e-06	0.00902351	-0.00473599
151.233	-37.4076	0.000731725	3.39504	1.25897e-06	0.00919603	-0.00440372
151.657	-37.8568	0.000729603	3.39603	1.22851e-06	0.00936827	-0.00409228
152.081	-38.3053	0.000727492	3.39701	1.19795e-06	0.00953946	-0.00380067
152.504	-38.7532	0.000725394	3.39799	1.16734e-06	0.00970879	-0.00352788
152.928	-39.2004	0.000723307	3.39896	1.13675e-06	0.00987544	-0.00327295
153.352	-39.647	0.000721231	3.39993	1.10622e-06	0.0100386	-0.00303492
153.776	-40.0929	0.000719168	3.4009	1.07581e-06	0.0101973	-0.00281283
154.2	-40.5383	0.000717115	3.40186	1.04558e-06	0.0103509	-0.0026058
154.623	-40.983	0.000715075	3.40282	1.01556e-06	0.0104983	-0.00241294
155.047	-41.4273	0.000713045	3.40378	9.85795e-07	0.0106388	-0.0022334
155.471	-41.871	0.000711028	3.40473	9.56335e-07	0.0107715	-0.00206638
155.895	-42.3142	0.000709021	3.40567	9.27213e-07	0.0108956	-0.0019111
156.318	-42.7569	0.000707026	3.40662	8.98465e-07	0.0110103	-0.00176682
156.742	-43.1991	0.000705042	3.40756	8.70121e-07	0.0111149	-0.00163284
157.166	-43.6409	0.000703069	3.40849	8.42211e-07	0.0112087	-0.00150849
157.59	-44.0823	0.000701107	3.40942	8.14761e-07	0.011291	-0.00139313
158.014	-44.5233	0.000699156	3.41035	7.87794e-07	0.0113613	-0.00128617
158.437	-44.964	0.000697216	3.41127	7.6133e-07	0.0114191	-0.00118705
158.861	-45.4043	0.000695287	3.41219	7.35388e-07	0.0114638	-0.00109522
159.285	-45.8442	0.000693369	3.41311	7.09982e-07	0.0114953	-0.00101019
159.709	-46.2839	0.000691462	3.41402	6.85126e-07	0.0115131	-0.00093149
160.133	-46.7233	0.000689566	3.41493	6.6083e-07	0.0115171	-0.000858673
160.556	-47.1625	0.00068768	3.41583	6.37104e-07	0.0115071	-0.000791326
160.98	-47.6014	0.000685805	3.41673	6.13953e-07	0.0114833	-0.00072906
161.404	-48.0402	0.00068394	3.41763	5.91384e-07	0.0114454	-0.000671512
161.828	-48.4788	0.000682086	3.41852	5.69399e-07	0.0113939	-0.00061834
162.251	-48.9173	0.000680242	3.41941	5.47999e-07	0.0113287	-0.000569229
162.675	-49.3557	0.000678409	3.4203	5.27185e-07	0.0112503	-0.000523882
163.099	-49.794	0.000676586	3.42118	5.06954e-07	0.0111589	-0.000482021
163.523	-50.2323	0.000674774	3.42206	4.87305e-07	0.0110551	-0.000443391
163.947	-50.6707	0.000672971	3.42293	4.68234e-07	0.0109391	-0.000407751
164.37	-51.1091	0.000671179	3.4238	4.49735e-07	0.0108117	-0.000374878
164.794	-51.5476	0.000669397	3.42467	4.31803e-07	0.0106732	-0.000344566
165.218	-51.9863	0.000667625	3.42553	4.1443e-07	0.0105244	-0.000316621
165.642	-52.4252	0.000665863	3.42639	3.9761e-07	0.0103658	-0.000290865
166.066	-52.8643	0.000664111	3.42725	3.81334e-07	0.0101981	-0.000267132
166.489	-53.3038	0.000662369	3.4281	3.65592e-07	0.010022	-0.000245267
166.913	-53.7436	0.000660636	3.42895	3.50376e-07	0.00983811	-0.000225129
167.337	-54.1838	0.000658913	3.4298	3.35675e-07	0.00964714	-0.000206585
167.761	-54.6246	0.0006572	3.43064	3.21479e-07	0.00944978	-0.000189512
168.184	-55.0658	0.000655497	3.43148	3.07777e-07	0.0092467	-0.000173797
168.608	-55.5077	0.000653803	3.43231	2.94558e-07	0.00903857	-0.000159336
169.032	-55.9503	0.000652119	3.43314	2.81812e-07	0.00882604	-0.000146031
169.456	-56.3936	0.000650444	3.43397	2.69526e-07	0.00860977	-0.000133792
169.88	-56.8377	0.000648779	3.43479	2.57689e-07	0.00839037	-0.000122537
170.303	-57.2828	0.000647123	3.43561	2.4629e-07	0.00816844	-0.000112189
170.727	-57.7288	0.000645476	3.43643	2.35316e-07	0.00794456	-0.000102678
171.151	-58.1758	0.000643839	3.43724	2.24756e-07	0.00771928	-9.39368e-05
171.575	-58.6239	0.000642211	3.43805	2.14599e-07	0.00749313	-8.59062e-05
171.999	-59.0733	0.000640592	3.43886	2.04832e-07	0.00726663	-7.85303e-05
172.422	-59.5239	0.000638982	3.43966	1.95445e-07	0.00704023	-7.17576e-05
172.846	-59.9758	0.000637381	3.44046	1.86426e-07	0.00681438	-6.55406e-05
173.27	-60.4291	0.000635789	3.44126	1.77763e-07	0.00658952	-5.98355e-05
173.694	-60.884	0.000634206	3.44205	1.69446e-07	0.00636603	-5.46018e-05
174.117	-61.3403	0.000632632	3.44284	1.61463e-07	0.00614428	-4.98023e-05
174.541	-61.7983	0.000631066	3.44363	1.53805e-07	0.00592461	-4.54025e-05
174.965	-62.258	0.000629509	3.44441	1.46459e-07	0.00570734	-4.13706e-05
175.389	-62.7195	0.000627962	3.44519	1.39417e-07	0.00549277	-3.76775e-05
175.813	-63.1827	0.000626422	3.44597	1.32668e-07	0.00528116	-3.4296e-05
176.236	-63.6477	0.000624891	3.44674	1.26201e-07	0.00507275	-3.12013e-05
176.66	-64.1146	0.000623369	3.44751	1.20008e-07	0.00486778	-2.83704e-05
177.084	-64.5835	0.000621856	3.44827	1.14079e-07	0.00466645	-2.57821e-05
177.508	-65.0542	0.00062035	3.44904	1.08404e-07	0.00446895	-2.34169e-05
177.931	-65.5269	0.000618853	3.4498	1.02975e-07	0.00427544	-2.12567e-05
178.355	-66.0015	0.000617365	3.45055	9.77824e-08	0.00408607	-1.9285e-05
178.779	-66.4779	0.000615885	3.45131	9.28185e-08	0.00390098	-1.74864e-05
179.203	-66.9563	0.000614412	3.45205	8.80748e-08	0.00372029	-1.58467e-05
179.627	-67.4364	0.000612949	3.4528	8.35431e-08	0.00354411	-1.43529e-05
180.05	-67.9182	0.000611493	3.45354	7.92156e-08	0.00337252	-1.2993e-05
180.474	-68.4016	0.000610045	3.45428	7.50848e-08	0.0032056	-1.17559e-05
180.898	-68.8865	0.000608605	3.45502	7.11434e-08	0.00304343	-1.06314e-05
181.322	-69.3726	0.000607174	3.45575	6.7384e-08	0.00288606	-9.60996e-06
181.746	-69.8598	0.00060575	3.45649	6.37999e-08	0.00273355	-8.683e-06
182.169	-70.3479	0.000604334	3.45721	6.03844e-08	0.00258592	-7.84245e-06
182.593	-70.8366	0.000602926	3.45794	5.71308e-08	0.00244322	-7.08092e-06
183.017	-71.3256	0.000601525	3.45866	5.40329e-08	0.00230547	-6.39161e-06
183.441	-71.8145	0.000600133	3.45938	5.10847e-08	0.00217269	-5.76822e-06
183.864	-72.3029	0.000598748	3.46009	4.82801e-08	0.00204488	-5.20499e-06
184.288	-72.7904	0.000597371	3.4608	4.56135e-08	0.00192204	-4.69657e-06
184.712	-73.2765	0.000596001	3.46151	4.30794e-08	0.00180419	-4.23806e-06
185.136	-73.7607	0.000594639	3.46222	4.06725e-08	0.00169131	-3.82494e-06
185.56	-74.2425	0.000593284	3.46292	3.83875e-08	0.00158337	-3.45307e-06
185.983	-74.7211	0.000591937	3.46362	3.62196e-08	0.00148037	-3.11862e-06
186.407	-75.196	0.000590597	3.46431	3.41639e-08	0.00138226	-2.81809e-06
186.831	-75.6664	0.000589264	3.46501	3.22159e-08	0.001289	-2.54825e-06
187.255	-76.1317	0.000587939	3.4657	3.0371e-08	0.00120054	-2.30616e-06
187.679	-76.591	0.000586621	3.46638	2.86251e-08	0.00111681	-2.08911e-06
188.102	-77.0437	0.00058531	3.46707	2.69739e-08	0.00103775	-1.89462e-06
188.526	-77.489	0.000584007	3.46775	2.54134e-08	0.000963245	-1.72044e-06
188.95	-77.926	0.00058271	3.46843	2.39398e-08	0.000893204	-1.56451e-06
189.374	-78.3541	0.000581421	3.4691	2.25494e-08	0.000827507	-1.42496e-06
189.797	-78.7724	0.000580139	3.46978	2.12384e-08	0.000766021	-1.30008e-06
190.221	-79.1804	0.000578863	3.47045	2.00035e-08	0.0007086	-1.18835e-06
190.645	-79.5772	0.000577595	3.47111	1.8841e-08	0.000655089	-1.08836e-06
191.069	-79.9624	0.000576334	3.47178	1.77478e-08	0.000605321	-9.98877e-07
191.493	-80.3353	0.000575079	3.47244	1.67205e-08	0.000559122	-9.18771e-07
191.916	-80.6954	0.000573831	3.4731	1.57559e-08	0.000516314	-8.47038e-07
192.34	-81.0424	0.000572591	3.47375	1.4851e-08	0.000476712	-7.82782e-07
192.764	-81.3759	0.000571356	3.4744	1.40026e-08	0.000440134	-7.25202e-07
193.188	-81.6957	0.000570129	3.47505	1.32078e-08	0.000406395	-6.73588e-07
193.612	-82.0015	0.000568908	3.4757	1.24638e-08	0.000375314	-6.27308e-07
194.035	-82.2934	0.000567694	3.47634	1.17676e-08	0.000346715	-5.85802e-07
194.459	-82.5714	0.000566487	3.47698	1.11167e-08	0.000320427	-5.48571e-07
194.883	-82.8354	0.000565286	3.47762	1.05083e-08	0.000296285	-5.15174e-07
195.307	-83.0857	0.000564092	3.47826	9.93997e-09	0.00027413	-4.85217e-07
195.73	-83.3225	0.000562904	3.47889	9.4093e-09	0.000253814	-4.5835e-07
196.154	-83.546	0.000561722	3.47952	8.91397e-09	0.000235193	-4.34262e-07
196.578	-83.7567	0.000560547	3.48015	8.45183e-09	0.000218136	-4.12671e-07
197.002	-83.9549	0.000559379	3.48077	8.0208e-09	0.000202517	-3.93328e-07
197.426	-84.141	0.000558216	3.48139	7.61896e-09	0.000188219	-3.76007e-07
197.849	-84.3154	0.00055706	3.48201	7.24447e-09	0.000175133	-3.60506e-07
198.273	-84.4787	0.00055591	3.48263	6.89564e-09	0.000163159	-3.46642e-07
198.697	-84.6314	0.000554767	3.48324	6.57086e-09	0.000152203	-3.3425e-07
199.121	-84.7739	0.000553629	3.48385	6.26867e-09	0.000142179	-3.23181e-07
199.544	-84.9068	0.000552498	3.48446	5.98768e-09	0.000133008	-3.13299e-07
199.968	-85.0306	0.000551373	3.48507	5.7266e-09	0.000124616	-3.04485e-07
200.392	-85.1458	0.000550254	3.48567	5.48425e-09	0.000116936	-2.96627e-07
200.816	-85.2528	0.000549141	3.48627	5.25953e-09	0.000109908	-2.89627e-07
201.24	-85.3523	0.000548034	3.48687	5.05141e-09	0.000103473	-2.83396e-07
201.663	-85.4446	0.000546933	3.48746	4.85894e-09	9.75818e-05	-2.77852e-07
202.087	-85.5302	0.000545837	3.48806	4.68124e-09	9.2186e-05	-2.72925e-07
202.511	-85.6095	0.000544748	3.48865	4.5175e-09	8.72427e-05	-2.68549e-07
202.935	-85.683	0.000543664	3.48923	4.36697e-09	8.27127e-05	-2.64665e-07
203.359	-85.7511	0.000542587	3.48982	4.22893e-09	7.85598e-05	-2.61222e-07
203.782	-85.8142	0.000541515	3.4904	4.10273e-09	7.47514e-05	-2.58173e-07
204.206	-85.8725	0.000540449	3.49098	3.98776e-09	7.12575e-05	-2.55476e-07
204.63	-85.9265	0.000539388	3.49156	3.88346e-09	6.80506e-05	-2.53094e-07
205.054	-85.9765	0.000538333	3.49213	3.7893e-09	6.5106e-05	-2.50993e-07
205.477	-86.0227	0.000537284	3.4927	3.70478e-09	6.24009e-05	-2.49145e-07
205.901	-86.0654	0.00053624	3.49327	3.62945e-09	5.99145e-05	-2.47521e-07
206.325	-86.105	0.000535202	3.49384	3.56288e-09	5.76279e-05	-2.46099e-07
206.749	-86.1417	0.000534169	3.49441	3.50466e-09	5.55239e-05	-2.44857e-07
207.173	-86.1756	0.000533142	3.49497	3.45443e-09	5.35867e-05	-2.43777e-07
207.596	-86.207	0.00053212	3.49553	3.41184e-09	5.18019e-05	-2.42842e-07
208.02	-86.2361	0.000531104	3.49608	3.37656e-09	5.01565e-05	-2.42037e-07
208.444	-86.263	0.000530093	3.49664	3.34828e-09	4.86384e-05	-2.41347e-07
208.868	-86.288	0.000529088	3.49719	3.32672e-09	4.72368e-05	-2.40763e-07
209.292	-86.3112	0.000528087	3.49774	3.31163e-09	4.59416e-05	-2.40271e-07
209.715	-86.3328	0.000527092	3.49829	3.30274e-09	4.47438e-05	-2.39864e-07
210.139	-86.3528	0.000526102	3.49883	3.29984e-09	4.36351e-05	-2.39532e-07
210.563	-86.3714	0.000525118	3.49938	3.30271e-09	4.26078e-05	-2.39268e-07
210.987	-86.3887	0.000524138	3.49992	3.31115e-09	4.1655e-05	-2.39065e-07
211.41	-86.4048	0.000523164	3.50046	3.32497e-09	4.07704e-05	-2.38917e-07
211.834	-86.4198	0.000522195	3.50099	3.34402e-09	3.99481e-05	-2.38817e-07
212.258	-86.4339	0.000521231	3.50152	3.36813e-09	3.9183e-05	-2.38762e-07
212.682	-86.447	0.000520272	3.50206	3.39715e-09	3.84702e-05	-2.38746e-07
213.106	-86.4592	0.000519318	3.50258	3.43096e-09	3.78052e-05	-2.38766e-07
213.529	-86.4707	0.000518368	3.50311	3.46942e-09	3.7184e-05	-2.38817e-07
213.953	-86.4815	0.000517424	3.50363	3.51244e-09	3.66029e-05	-2.38897e-07
214.377	-86.4916	0.000516485	3.50416	3.5599e-09	3.60586e-05	-2.39003e-07
214.801	-86.5012	0.00051555	3.50468	3.61172e-09	3.5548e-05	-2.39131e-07
215.225	-86.5101	0.000514621	3.50519	3.66781e-09	3.50682e-05	-2.3928e-07
215.648	-86.5186	0.000513696	3.50571	3.72809e-09	3.46166e-05	-2.39447e-07
216.072	-86.5266	0.000512776	3.50622	3.7925e-09	3.4191e-05	-2.3963e-07
216.496	-86.5342	0.000511861	3.50673	3.86099e-09	3.37891e-05	-2.39827e-07
216.92	-86.5414	0.00051095	3.50724	3.93349e-09	3.3409e-05	-2.40038e-07
217.343	-86.5482	0.000510045	3.50775	4.00997e-09	3.30489e-05	-2.40259e-07
217.767	-86.5547	0.000509144	3.50825	4.09039e-09	3.2707e-05	-2.4049e-07
218.191	-86.5609	0.000508247	3.50875	4.17471e-09	3.2382e-05	-2.4073e-07
218.615	-86.5668	0.000507355	3.50925	4.26291e-09	3.20724e-05	-2.40978e-07
219.039	-86.5724	0.000506468	3.50975	4.35497e-09	3.1777e-05	-2.41232e-07
219.462	-86.5778	0.000505585	3.51024	4.45088e-09	3.14945e-05	-2.41492e-07
219.886	-86.583	0.000504707	3.51074	4.55063e-09	3.1224e-05	-2.41756e-07
220.31	-86.588	0.000503833	3.51123	4.65422e-09	3.09645e-05	-2.42025e-07
220.734	-86.5928	0.000502964	3.51172	4.76164e-09	3.07151e-05	-2.42297e-07
221.157	-86.5974	0.000502099	3.5122	4.8729e-09	3.04749e-05	-2.42571e-07
221.581	-86.6019	0.000501238	3.51269	4.98802e-09	3.02433e-05	-2.42848e-07
222.005	-86.6062	0.000500382	3.51317	5.10701e-09	3.00195e-05	-2.43126e-07
222.429	-86.6104	0.00049953	3.51365	5.22988e-09	2.9803e-05	-2.43406e-07
222.853	-86.6145	0.000498683	3.51413	5.35667e-09	2.95931e-05	-2.43686e-07
223.276	-86.6185	0.00049784	3.5146	5.48739e-09	2.93894e-05	-2.43967e-07
223.7	-86.6223	0.000497001	3.51508	5.62208e-09	2.91914e-05	-2.44248e-07
224.124	-86.6261	0.000496166	3.51555	5.76077e-09	2.89985e-05	-2.44528e-07
224.548	-86.6297	0.000495336	3.51602	5.9035e-09	2.88105e-05	-2.44808e-07
224.972	-86.6333	0.00049451	3.51649	6.05031e-09	2.8627e-05	-2.45087e-07
225.395	-86.6368	0.000493688	3.51695	6.20125e-09	2.84476e-05	-2.45365e-07
225.819	-86.6402	0.00049287	3.51742	6.35635e-09	2.8272e-05	-2.45642e-07
226.243	-86.6436	0.000492056	3.51788	6.51568e-09	2.81e-05	-2.45917e-07
226.667	-86.6469	0.000491246	3.51834	6.67928e-09	2.79312e-05	-2.4619e-07
227.09	-86.6502	0.00049044	3.51879	6.84721e-09	2.77655e-05	-2.46462e-07
227.514	-86.6533	0.000489639	3.51925	7.01952e-09	2.76026e-05	-2.46732e-07
227.938	-86.6565	0.000488841	3.5197	7.19628e-09	2.74423e-05	-2.47e-07
228.362	-86.6596	0.000488047	3.52015	7.37755e-09	2.72845e-05	-2.47266e-07
228.786	-86.6626	0.000487258	3.5206	7.56341e-09	2.7129e-05	-2.47529e-07
229.209	-86.6656	0.000486472	3.52105	7.7539e-09	2.69756e-05	-2.47791e-07
229.633	-86.6686	0.00048569	3.5215	7.94911e-09	2.68242e-05	-2.48049e-07
230.057	-86.6715	0.000484912	3.52194	8.14911e-09	2.66747e-05	-2.48306e-07
230.481	-86.6744	0.000484138	3.52238	8.35398e-09	2.65269e-05	-2.48559e-07
230.905	-86.6773	0.000483368	3.52282	8.56378e-09	2.63808e-05	-2.48811e-07
231.328	-86.6801	0.000482601	3.52326	8.77861e-09	2.62362e-05	-2.49059e-07
231.752	-86.6829	0.000481839	3.5237	8.99854e-09	2.60931e-05	-2.49305e-07
232.176	-86.6857	0.00048108	3.52413	9.22366e-09	2.59513e-05	-2.49549e-07
232.6	-86.6885	0.000480325	3.52456	9.45405e-09	2.58109e-05	-2.49789e-07
233.023	-86.6912	0.000479573	3.52499	9.6898e-09	2.56716e-05	-2.50027e-07
233.447	-86.6939	0.000478826	3.52542	9.93101e-09	2.55336e-05	-2.50262e-07
233.871	-86.6966	0.000478082	3.52585	1.01778e-08	2.53966e-05	-2.50494e-07
234.295	-86.6992	0.000477341	3.52627	1.04301e-08	2.52607e-05	-2.50724e-07
234.719	-86.7019	0.000476605	3.52669	1.06883e-08	2.51257e-05	-2.50951e-07
235.142	-86.7045	0.000475872	3.52712	1.09522e-08	2.49918e-05	-2.51175e-07
235.566	-86.7071	0.000475142	3.52753	1.12221e-08	2.48587e-05	-2.51396e-07
235.99	-86.7097	0.000474416	3.52795	1.1498e-08	2.47266e-05	-2.51614e-07
236.414	-86.7122	0.000473694	3.52837	1.178e-08	2.45952e-05	-2.5183e-07
236.838	-86.7148	0.000472975	3.52878	1.20683e-08	2.44647e-05	-2.52043e-07
237.261	-86.7173	0.00047226	3.52919	1.23629e-08	2.4335e-05	-2.52253e-07
237.685	-86.7198	0.000471548	3.5296	1.2664e-08	2.4206e-05	-2.5246e-07
238.109	-86.7223	0.000470839	3.53001	1.29717e-08	2.40778e-05	-2.52665e-07
238.533	-86.7248	0.000470134	3.53042	1.3286e-08	2.39502e-05	-2.52867e-07
238.956	-86.7273	0.000469433	3.53082	1.36071e-08	2.38233e-05	-2.53066e-07
239.38	-86.7298	0.000468735	3.53122	1.39351e-08	2.36971e-05	-2.53263e-07
239.804	-86.7322	0.00046804	3.53162	1.42702e-08	2.35716e-05	-2.53457e-07
240.228	-86.7346	0.000467348	3.53202	1.46123e-08	2.34466e-05	-2.53648e-07
240.652	-86.737	0.00046666	3.53242	1.49618e-08	2.33223e-05	-2.53837e-07
241.075	-86.7394	0.000465976	3.53282	1.53186e-08	2.31986e-05	-2.54023e-07
241.499	-86.7418	0.000465294	3.53321	1.56829e-08	2.30755e-05	-2.54206e-07
241.923	-86.7442	0.000464616	3.5336	1.60549e-08	2.29529e-05	-2.54387e-07
242.347	-86.7466	0.000463941	3.53399	1.64346e-08	2.28309e-05	-2.54566e-07
242.771	-86.7489	0.00046327	3.53438	1.68222e-08	2.27095e-05	-2.54741e-07
243.194	-86.7513	0.000462601	3.53477	1.72178e-08	2.25886e-05	-2.54915e-07
243.618	-86.7536	0.000461936	3.53516	1.76216e-08	2.24682e-05	-2.55085e-07
244.042	-86.7559	0.000461274	3.53554	1.80336e-08	2.23484e-05	-2.55254e-07
244.466	-86.7582	0.000460615	3.53592	1.84541e-08	2.2229e-05	-2.5542e-07
244.889	-86.7605	0.000459959	3.5363	1.88831e-08	2.21102e-05	-2.55583e-07
245.313	-86.7628	0.000459307	3.53668	1.93208e-08	2.19919e-05	-2.55744e-07
245.737	-86.7651	0.000458657	3.53706	1.97673e-08	2.18741e-05	-2.55903e-07
246.161	-86.7674	0.000458011	3.53743	2.02228e-08	2.17568e-05	-2.56059e-07
246.585	-86.7696	0.000457368	3.53781	2.06873e-08	2.164e-05	-2.56213e-07
247.008	-86.7719	0.000456728	3.53818	2.11611e-08	2.15236e-05	-2.56365e-07
247.432	-86.7741	0.00045609	3.53855	2.16443e-08	2.14077e-05	-2.56514e-07
247.856	-86.7763	0.000455456	3.53892	2.21371e-08	2.12923e-05	-2.56661e-07
248.28	-86.7785	0.000454825	3.53928	2.26395e-08	2.11774e-05	-2.56806e-07
248.703	-86.7807	0.000454197	3.53965	2.31517e-08	2.10629e-05	-2.56949e-07
249.127	-86.7829	0.000453572	3.54001	2.36739e-08	2.09489e-05	-2.57089e-07
249.551	-86.7851	0.00045295	3.54038	2.42063e-08	2.08353e-05	-2.57228e-07
249.975	-86.7873	0.00045233	3.54074	2.47489e-08	2.07222e-05	-2.57364e-07
250.399	-86.7895	0.000451714	3.5411	2.53019e-08	2.06096e-05	-2.57498e-07
250.822	-86.7916	0.0004511	3.54145	2.58655e-08	2.04974e-05	-2.5763e-07
251.246	-86.7938	0.00045049	3.54181	2.64398e-08	2.03856e-05	-2.5776e-07
251.67	-86.7959	0.000449882	3.54216	2.70251e-08	2.02743e-05	-2.57888e-07
252.094	-86.798	0.000449277	3.54252	2.76213e-08	2.01634e-05	-2.58013e-07
252.518	-86.8001	0.000448675	3.54287	2.82288e-08	2.00529e-05	-2.58137e-07
252.941	-86.8022	0.000448076	3.54322	2.88476e-08	1.99429e-05	-2.58259e-07
253.365	-86.8043	0.00044748	3.54357	2.94779e-08	1.98333e-05	-2.58379e-07
253.789	-86.8064	0.000446886	3.54391	3.01199e-08	1.97241e-05	-2.58497e-07
254.213	-86.8085	0.000446295	3.54426	3.07737e-08	1.96154e-05	-2.58613e-07
254.636	-86.8106	0.000445707	3.5446	3.14395e-08	1.9507e-05	-2.58727e-07
255.06	-86.8126	0.000445122	3.54494	3.21174e-08	1.93991e-05	-2.58839e-07
255.484	-86.8147	0.000444539	3.54528	3.28077e-08	1.92916e-05	-2.58949e-07
255.908	-86.8167	0.00044396	3.54562	3.35104e-08	1.91846e-05	-2.59058e-07
256.332	-86.8188	0.000443382	3.54596	3.42257e-08	1.90779e-05	-2.59164e-07
256.755	-86.8208	0.000442808	3.5463	3.49539e-08	1.89717e-05	-2.59269e-07
257.179	-86.8228	0.000442236	3.54663	3.5695e-08	1.88658e-05	-2.59372e-07
257.603	-86.8248	0.000441667	3.54696	3.64492e-08	1.87604e-05	-2.59474e-07
258.027	-86.8268	0.0004411	3.5473	3.72167e-08	1.86554e-05	-2.59573e-07
258.451	-86.8288	0.000440536	3.54763	3.79976e-08	1.85508e-05	-2.59671e-07
258.874	-86.8308	0.000439975	3.54795	3.87921e-08	1.84465e-05	-2.59767e-07
259.298	-86.8328	0.000439416	3.54828	3.96004e-08	1.83427e-05	-2.59862e-07
259.722	-86.8348	0.00043886	3.54861	4.04227e-08	1.82393e-05	-2.59954e-07
260.146	-86.8367	0.000438307	3.54893	4.1259e-08	1.81363e-05	-2.60046e-07
260.569	-86.8387	0.000437756	3.54925	4.21096e-08	1.80337e-05	-2.60135e-07
260.993	-86.8406	0.000437207	3.54958	4.29746e-08	1.79315e-05	-2.60223e-07
261.417	-86.8425	0.000436661	3.5499	4.38541e-08	1.78296e-05	-2.60309e-07
261.841	-86.8445	0.000436118	3.55021	4.47484e-08	1.77282e-05	-2.60394e-07
262.265	-86.8464	0.000435577	3.55053	4.56576e-08	1.76272e-05	-2.60478e-07
262.688	-86.8483	0.000435038	3.55085	4.65819e-08	1.75265e-05	-2.60559e-07
263.112	-86.8502	0.000434502	3.55116	4.75213e-08	1.74262e-05	-2.60639e-07
263.536	-86.8521	0.000433969	3.55147	4.84762e-08	1.73264e-05	-2.60718e-07
263.96	-86.854	0.000433438	3.55179	4.94465e-08	1.72268e-05	-2.60795e-07
264.384	-86.8558	0.000432909	3.5521	5.04326e-08	1.71277e-05	-2.60871e-07
264.807	-86.8577	0.000432383	3.5524	5.14344e-08	1.7029e-05	-2.60946e-07
265.231	-86.8596	0.000431859	3.55271	5.24523e-08	1.69306e-05	-2.61018e-07
265.655	-86.8614	0.000431337	3.55302	5.34863e-08	1.68327e-05	-2.6109e-07
266.079	-86.8633	0.000430818	3.55332	5.45366e-08	1.6735e-05	-2.6116e-07
266.502	-86.8651	0.000430301	3.55363	5.56034e-08	1.66378e-05	-2.61229e-07
266.926	-86.8669	0.000429787	3.55393	5.66867e-08	1.6541e-05	-2.61296e-07
267.35	-86.8688	0.000429275	3.55423	5.77868e-08	1.64445e-05	-2.61362e-07
267.774	-86.8706	0.000428765	3.55453	5.89037e-08	1.63484e-05	-2.61427e-07
268.198	-86.8724	0.000428258	3.55483	6.00377e-08	1.62526e-05	-2.61491e-07
268.621	-86.8742	0.000427753	3.55512	6.11888e-08	1.61572e-05	-2.61553e-07
269.045	-86.876	0.00042725	3.55542	6.23572e-08	1.60622e-05	-2.61614e-07
269.469	-86.8778	0.000426749	3.55571	6.35431e-08	1.59676e-05	-2.61673e-07
269.893	-86.8795	0.000426251	3.556	6.47465e-08	1.58733e-05	-2.61731e-07
270.316	-86.8813	0.000425755	3.5563	6.59676e-08	1.57794e-05	-2.61789e-07
270.74	-86.8831	0.000425261	3.55658	6.72065e-08	1.56858e-05	-2.61844e-07
271.164	-86.8848	0.000424769	3.55687	6.84634e-08	1.55926e-05	-2.61899e-07
271.588	-86.8866	0.00042428	3.55716	6.97383e-08	1.54998e-05	-2.61953e-07
272.012	-86.8883	0.000423793	3.55745	7.10314e-08	1.54073e-05	-2.62005e-07
272.435	-86.8901	0.000423308	3.55773	7.23428e-08	1.53152e-05	-2.62056e-07
272.859	-86.8918	0.000422825	3.55802	7.36726e-08	1.52234e-05	-2.62106e-07
273.283	-86.8935	0.000422344	3.5583	7.5021e-08	1.5132e-05	-2.62155e-07
273.707	-86.8952	0.000421866	3.55858	7.6388e-08	1.50409e-05	-2.62203e-07
274.131	-86.8969	0.000421389	3.55886	7.77737e-08	1.49502e-05	-2.6225e-07
274.554	-86.8986	0.000420915	3.55914	7.91782e-08	1.48599e-05	-2.62295e-07
274.978	-86.9003	0.000420443	3.55941	8.06017e-08	1.47698e-05	-2.6234e-07
275.402	-86.902	0.000419973	3.55969	8.20442e-08	1.46802e-05	-2.62383e-07
275.826	-86.9037	0.000419505	3.55996	8.35057e-08	1.45908e-05	-2.62426e-07
276.249	-86.9053	0.000419039	3.56024	8.49865e-08	1.45019e-05	-2.62467e-07
276.673	-86.907	0.000418575	3.56051	8.64865e-08	1.44132e-05	-2.62508e-07
277.097	-86.9086	0.000418114	3.56078	8.80059e-08	1.43249e-05	-2.62547e-07
277.521	-86.9103	0.000417654	3.56105	8.95446e-08	1.4237e-05	-2.62585e-07
277.945	-86.9119	0.000417197	3.56132	9.11029e-08	1.41493e-05	-2.62623e-07
278.368	-86.9136	0.000416741	3.56159	9.26806e-08	1.40621e-05	-2.62659e-07
278.792	-86.9152	0.000416287	3.56185	9.42779e-08	1.39751e-05	-2.62695e-07
279.216	-86.9168	0.000415836	3.56212	9.58949e-08	1.38885e-05	-2.62729e-07
279.64	-86.9184	0.000415386	3.56238	9.75316e-08	1.38022e-05	-2.62763e-07
280.064	-86.92	0.000414939	3.56264	9.91879e-08	1.37163e-05	-2.62796e-07
280.487	-86.9216	0.000414493	3.5629	1.00864e-07	1.36307e-05	-2.62827e-07
280.911	-86.9232	0.00041405	3.56316	1.0256e-07	1.35454e-05	-2.62858e-07
281.335	-86.9248	0.000413608	3.56342	1.04276e-07	1.34604e-05	-2.62888e-07
281.759	-86.9264	0.000413168	3.56368	1.06011e-07	1.33758e-05	-2.62917e-07
282.182	-86.928	0.000412731	3.56394	1.07767e-07	1.32915e-05	-2.62946e-07
282.606	-86.9296	0.000412295	3.56419	1.09542e-07	1.32075e-05	-2.62973e-07
283.03	-86.9311	0.000411861	3.56445	1.11337e-07	1.31238e-05	-2.62999e-07
283.454	-86.9327	0.000411429	3.5647	1.13152e-07	1.30405e-05	-2.63025e-07
283.878	-86.9342	0.000410999	3.56495	1.14986e-07	1.29575e-05	-2.6305e-07
284.301	-86.9358	0.000410571	3.5652	1.16841e-07	1.28748e-05	-2.63074e-07
284.725	-86.9373	0.000410144	3.56545	1.18715e-07	1.27924e-05	-2.63098e-07
285.149	-86.9388	0.00040972	3.5657	1.20609e-07	1.27104e-05	-2.6312e-07
285.573	-86.9404	0.000409297	3.56595	1.22523e-07	1.26286e-05	-2.63142e-07
285.997	-86.9419	0.000408877	3.5662	1.24457e-07	1.25472e-05	-2.63163e-07
286.42	-86.9434	0.000408458	3.56644	1.2641e-07	1.24661e-05	-2.63183e-07
286.844	-86.9449	0.000408041	3.56668	1.28382e-07	1.23853e-05	-2.63203e-07
287.268	-86.9464	0.000407625	3.56693	1.30374e-07	1.23048e-05	-2.63221e-07
287.692	-86.9479	0.000407212	3.56717	1.32386e-07	1.22246e-05	-2.63239e-07
288.115	-86.9494	0.0004068	3.56741	1.34417e-07	1.21448e-05	-2.63257e-07
288.539	-86.9509	0.000406391	3.56765	1.36467e-07	1.20652e-05	-2.63273e-07
288.963	-86.9523	0.000405983	3.56789	1.38537e-07	1.19859e-05	-2.63289e-07
289.387	-86.9538	0.000405576	3.56812	1.40625e-07	1.1907e-05	-2.63304e-07
289.811	-86.9553	0.000405172	3.56836	1.42733e-07	1.18283e-05	-2.63319e-07
290.234	-86.9567	0.000404769	3.5686	1.44859e-07	1.175e-05	-2.63333e-07
290.658	-86.9582	0.000404368	3.56883	1.47004e-07	1.1672e-05	-2.63346e-07
291.082	-86.9596	0.000403969	3.56906	1.49168e-07	1.15942e-05	-2.63359e-07
291.506	-86.9611	0.000403571	3.56929	1.5135e-07	1.15168e-05	-2.63371e-07
291.93	-86.9625	0.000403176	3.56953	1.53551e-07	1.14397e-05	-2.63382e-07
292.353	-86.9639	0.000402782	3.56976	1.5577e-07	1.13628e-05	-2.63393e-07
292.777	-86.9653	0.000402389	3.56998	1.58007e-07	1.12863e-05	-2.63403e-07
293.201	-86.9667	0.000401999	3.57021	1.60262e-07	1.121e-05	-2.63412e-07
293.625	-86.9682	0.00040161	3.57044	1.62535e-07	1.11341e-05	-2.63421e-07
294.048	-86.9696	0.000401222	3.57066	1.64825e-07	1.10584e-05	-2.63429e-07
294.472	-86.971	0.000400837	3.57089	1.67132e-07	1.0983e-05	-2.63437e-07
294.896	-86.9724	0.000400453	3.57111	1.69457e-07	1.09079e-05	-2.63444e-07
295.32	-86.9737	0.00040007	3.57133	1.71799e-07	1.08332e-05	-2.63451e-07
295.744	-86.9751	0.00039969	3.57156	1.74158e-07	1.07586e-05	-2.63457e-07
296.167	-86.9765	0.000399311	3.57178	1.76533e-07	1.06844e-05	-2.63462e-07
296.591	-86.9779	0.000398933	3.572	1.78925e-07	1.06105e-05	-2.63467e-07
297.015	-86.9792	0.000398558	3.57221	1.81332e-07	1.05369e-05	-2.63471e-07
297.439	-86.9806	0.000398184	3.57243	1.83756e-07	1.04635e-05	-2.63475e-07
297.862	-86.9819	0.000397811	3.57265	1.86196e-07	1.03904e-05	-2.63479e-07
298.286	-86.9833	0.00039744	3.57286	1.88651e-07	1.03176e-05	-2.63481e-07
298.71	-86.9846	0.000397071	3.57308	1.91121e-07	1.02451e-05	-2.63484e-07
299.134	-86.986	0.000396703	3.57329	1.93606e-07	1.01729e-05	-2.63486e-07
299.558	-86.9873	0.000396337	3.5735	1.96106e-07	1.01009e-05	-2.63487e-07
299.981	-86.9886	0.000395972	3.57371	1.9862e-07	1.00292e-05	-2.63488e-07
300	-86.9887	0.000395956	3.57372	1.98731e-07	1.00261e-05	-2.63488e-07
300	-86.9887	0.000395956	3.57372	1.98731e-07	1.00261e-05	-2.63488e-07
300.381	-56.848	0.000395631	3.57391	3.43537e-07	0.00272493	-1.62144e-05
300.832	-43.8016	0.000395251	3.57413	2.73237e-05	0.010363	-0.000914047
301.252	-11.4386	0.000394905	3.57434	0.000615991	0.0421915	-0.0798141
301.65	24.0164	0.000394648	3.57369	0.0712588	0.578541	-1.94362
302.079	26.7824	0.000394462	3.56889	0.227548	1.26461	-2.82597
302.508	28.7824	0.000394455	3.55863	0.378782	1.84071	-3.02162
302.936	30.1174	0.000394755	3.54393	0.484104	2.29442	-2.99177
303.365	30.9192	0.00039548	3.52651	0.53958	2.62828	-2.90469
303.794	31.3207	0.000396732	3.50789	0.556919	2.85496	-2.81647
304.223	31.4333	0.000398588	3.48914	0.550051	2.99172	-2.74305
304.651	31.3445	0.000401108	3.4709	0.529636	3.05657	-2.68651
305.08	31.1207	0.000404335	3.45349	0.502463	3.06614	-2.64449
305.509	30.811	0.000408293	3.43708	0.472484	3.03473	-2.61371
305.937	30.4517	0.000412997	3.42172	0.441897	2.97404	-2.59114
306.366	30.0688	0.000418443	3.40742	0.411891	2.89338	-2.57433
306.795	29.6808	0.000424615	3.39414	0.383083	2.79993	-2.56141
307.223	29.3005	0.000431483	3.38184	0.355774	2.6991	-2.55105
307.652	28.9366	0.000439002	3.37046	0.330088	2.59493	-2.54223
308.081	28.5946	0.00044712	3.35996	0.306048	2.49032	-2.53425
308.509	28.2778	0.000455771	3.35027	0.283622	2.38731	-2.52657
308.938	27.988	0.000464889	3.34134	0.262748	2.28731	-2.51878
309.367	27.7256	0.0004744	3.33313	0.24335	2.19123	-2.51056
309.795	27.4902	0.000484231	3.32558	0.225342	2.09961	-2.50168
310.224	27.2808	0.000494312	3.31865	0.208638	2.01274	-2.49194
310.653	27.0961	0.000504573	3.31229	0.193152	1.9307	-2.48123
311.081	26.9344	0.000514953	3.30647	0.178803	1.85344	-2.46947
311.51	26.794	0.000525393	3.30115	0.165512	1.78084	-2.45662
311.939	26.673	0.00053584	3.29629	0.153202	1.71268	-2.4427
312.368	26.5696	0.00054625	3.29186	0.141805	1.64874	-2.42775
312.796	26.482	0.000556583	3.28782	0.131255	1.58876	-2.41183
313.225	26.4085	0.000566802	3.28416	0.121489	1.53247	-2.39503
313.654	26.3474	0.000576881	3.28085	0.11245	1.47963	-2.37743
314.082	26.2973	0.000586792	3.27785	0.104085	1.42998	-2.35913
314.511	26.2567	0.000596517	3.27515	0.0963437	1.38326	-2.34024
314.94	26.2245	0.000606037	3.27273	0.0891805	1.33927	-2.32085
315.368	26.1993	0.000615341	3.27056	0.0825521	1.29778	-2.30107
315.797	26.1802	0.000624416	3.26864	0.0764189	1.2586	-2.28098
316.226	26.1662	0.000633255	3.26693	0.070744	1.22154	-2.26066
316.654	26.1565	0.000641851	3.26543	0.0654931	1.18644	-2.24019
317.083	26.1503	0.000650201	3.26412	0.0606347	1.15314	-2.21965
317.512	26.1469	0.000658302	3.26298	0.0561393	1.12151	-2.19908
317.94	26.1457	0.000666153	3.26202	0.0519799	1.09142	-2.17856
318.369	26.1462	0.000673753	3.2612	0.0481313	1.06275	-2.15811
318.798	26.1478	0.000681103	3.26052	0.0445703	1.03539	-2.1378
319.227	26.1502	0.000688206	3.25998	0.0412753	1.00926	-2.11765
319.655	26.153	0.000695063	3.25956	0.0382264	0.984269	-2.09769
320.084	26.1559	0.000701678	3.25925	0.0354051	0.960333	-2.07796
320.513	26.1586	0.000708054	3.25905	0.0327945	0.937383	-2.05847
320.941	26.1608	0.000714195	3.25895	0.0303788	0.915355	-2.03923
321.37	26.1623	0.000720105	3.25894	0.0281433	0.894189	-2.02028
321.799	26.1629	0.000725789	3.25901	0.0260745	0.873831	-2.00161
322.227	26.1626	0.00073125	3.25916	0.0241601	0.854233	-1.98324
322.656	26.161	0.000736495	3.25938	0.0223884	0.835349	-1.96517
323.085	26.1582	0.000741528	3.25967	0.0207488	0.817137	-1.94741
323.513	26.1539	0.000746354	3.26003	0.0192314	0.799561	-1.92996
323.942	26.1482	0.000750977	3.26044	0.017827	0.782585	-1.91283
324.371	26.1409	0.000755404	3.26091	0.0165273	0.766176	-1.89601
324.799	26.132	0.000759639	3.26142	0.0153244	0.750307	-1.8795
325.228	26.1215	0.000763687	3.26199	0.014211	0.734948	-1.86331
325.657	26.1092	0.000767553	3.2626	0.0131806	0.720075	-1.84742
326.085	26.0951	0.000771243	3.26325	0.0122269	0.705663	-1.83184
326.514	26.0794	0.000774761	3.26393	0.0113442	0.691692	-1.81657
326.943	26.0618	0.000778111	3.26466	0.0105273	0.67814	-1.80159
327.372	26.0424	0.000781299	3.26541	0.0097712	0.664988	-1.78691
327.8	26.0212	0.00078433	3.26619	0.00907142	0.652219	-1.77251
328.229	25.9982	0.000787208	3.26701	0.00842379	0.639815	-1.7584
328.658	25.9734	0.000789937	3.26784	0.00782443	0.627762	-1.74457
329.086	25.9469	0.000792522	3.26871	0.00726977	0.616043	-1.73101
329.515	25.9185	0.000794967	3.26959	0.0067565	0.604645	-1.71772
329.944	25.8883	0.000797277	3.2705	0.00628156	0.593556	-1.70469
330.372	25.8564	0.000799456	3.27142	0.00584211	0.582762	-1.69192
330.801	25.8227	0.000801507	3.27237	0.00543554	0.572251	-1.6794
331.23	25.7872	0.000803435	3.27333	0.00505943	0.562014	-1.66712
331.658	25.7501	0.000805243	3.2743	0.00471152	0.552038	-1.65508
332.087	25.7112	0.000806936	3.27529	0.00438976	0.542315	-1.64328
332.516	25.6706	0.000808516	3.27629	0.00409221	0.532835	-1.6317
332.944	25.6284	0.000809988	3.27731	0.00381711	0.523588	-1.62035
333.373	25.5846	0.000811354	3.27834	0.00356281	0.514567	-1.60921
333.802	25.5391	0.000812619	3.27937	0.00332779	0.505762	-1.59829
334.231	25.492	0.000813785	3.28042	0.00311065	0.497167	-1.58757
334.659	25.4434	0.000814855	3.28147	0.00291008	0.488774	-1.57705
335.088	25.3932	0.000815834	3.28254	0.00272488	0.480576	-1.56673
335.517	25.3414	0.000816723	3.28361	0.00255394	0.472566	-1.5566
335.945	25.2882	0.000817525	3.28469	0.00239622	0.464738	-1.54665
336.374	25.2335	0.000818244	3.28577	0.00225078	0.457085	-1.53689
336.803	25.1773	0.000818882	3.28686	0.00211672	0.449602	-1.5273
337.231	25.1197	0.000819441	3.28795	0.00199324	0.442284	-1.51789
337.66	25.0606	0.000819925	3.28905	0.00187957	0.435124	-1.50864
338.089	25.0002	0.000820336	3.29016	0.00177503	0.428118	-1.49955
338.517	24.9384	0.000820676	3.29127	0.00167895	0.421261	-1.49063
338.946	24.8752	0.000820948	3.29238	0.00159075	0.414549	-1.48186
339.375	24.8107	0.000821153	3.29349	0.00150986	0.407976	-1.47324
339.803	24.745	0.000821295	3.29461	0.00143578	0.401538	-1.46477
340.232	24.6779	0.000821375	3.29573	0.00136804	0.395231	-1.45644
340.661	24.6095	0.000821395	3.29685	0.00130619	0.389052	-1.44824
341.089	24.5399	0.000821357	3.29797	0.00124983	0.382997	-1.44019
341.518	24.4691	0.000821264	3.2991	0.00119859	0.377061	-1.43226
341.947	24.3971	0.000821118	3.30023	0.00115211	0.371242	-1.42447
342.376	24.3239	0.000820919	3.30135	0.00111009	0.365535	-1.4168
342.804	24.2495	0.00082067	3.30248	0.00107221	0.359939	-1.40925
343.233	24.1739	0.000820373	3.30361	0.00103821	0.354449	-1.40182
343.662	24.0972	0.000820029	3.30474	0.00100784	0.349063	-1.39451
344.09	24.0194	0.00081964	3.30587	0.000980857	0.343777	-1.38731
344.519	23.9405	0.000819208	3.307	0.00095705	0.33859	-1.38021
344.948	23.8605	0.000818733	3.30813	0.00093622	0.333499	-1.37323
345.376	23.7794	0.000818218	3.30926	0.000918181	0.3285	-1.36635
345.805	23.6973	0.000817664	3.31039	0.000902764	0.323592	-1.35957
346.234	23.6142	0.000817073	3.31152	0.000889813	0.318771	-1.35288
346.662	23.53	0.000816445	3.31264	0.000879183	0.314037	-1.3463
347.091	23.4447	0.000815782	3.31377	0.000870741	0.309386	-1.33981
347.52	23.3585	0.000815085	3.3149	0.000864365	0.304817	-1.3334
347.948	23.2713	0.000814356	3.31602	0.000859941	0.300327	-1.32709
348.377	23.1831	0.000813596	3.31714	0.000857366	0.295915	-1.32086
348.806	23.094	0.000812806	3.31827	0.000856545	0.291578	-1.31472
349.235	23.0039	0.000811986	3.31939	0.000857389	0.287316	-1.30866
349.663	22.9129	0.000811139	3.3205	0.000859819	0.283125	-1.30267
350.092	22.8209	0.000810265	3.32162	0.000863761	0.279005	-1.29677
350.521	22.728	0.000809365	3.32274	0.000869147	0.274953	-1.29094
350.949	22.6342	0.000808441	3.32385	0.000875916	0.270968	-1.28518
351.378	22.5395	0.000807492	3.32496	0.000884011	0.267049	-1.27949
351.807	22.4438	0.000806521	3.32607	0.000893381	0.263194	-1.27387
352.235	22.3474	0.000805527	3.32718	0.000903979	0.259402	-1.26832
352.664	22.25	0.000804513	3.32828	0.000915764	0.255671	-1.26284
353.093	22.1517	0.000803478	3.32938	0.000928695	0.251999	-1.25742
353.521	22.0526	0.000802424	3.33048	0.00094274	0.248387	-1.25206
353.95	21.9527	0.000801351	3.33158	0.000957865	0.244831	-1.24676
354.379	21.8519	0.00080026	3.33268	0.000974045	0.241332	-1.24152
354.807	21.7502	0.000799153	3.33377	0.000991252	0.237888	-1.23634
355.236	21.6477	0.000798029	3.33486	0.00100947	0.234497	-1.23121
355.665	21.5444	0.000796889	3.33595	0.00102867	0.231159	-1.22613
356.093	21.4402	0.000795734	3.33703	0.00104883	0.227873	-1.22111
356.522	21.3352	0.000794565	3.33811	0.00106996	0.224637	-1.21614
356.951	21.2294	0.000793383	3.33919	0.00109202	0.221451	-1.21121
357.38	21.1228	0.000792187	3.34026	0.00111502	0.218313	-1.20634
357.808	21.0154	0.000790979	3.34134	0.00113893	0.215223	-1.20151
358.237	20.9072	0.000789759	3.34241	0.00116376	0.212179	-1.19672
358.666	20.7981	0.000788528	3.34347	0.00118949	0.209181	-1.19198
359.094	20.6883	0.000787287	3.34453	0.00121612	0.206228	-1.18728
359.523	20.5777	0.000786035	3.34559	0.00124366	0.203319	-1.18262
359.952	20.4662	0.000784774	3.34665	0.00127209	0.200453	-1.17799
360.38	20.354	0.000783503	3.3477	0.00130141	0.197629	-1.17341
360.809	20.241	0.000782224	3.34875	0.00133164	0.194847	-1.16886
361.238	20.1271	0.000780937	3.3498	0.00136275	0.192105	-1.16435
361.666	20.0125	0.000779642	3.35084	0.00139477	0.189403	-1.15987
362.095	19.8971	0.00077834	3.35188	0.00142769	0.186741	-1.15543
362.524	19.7809	0.000777031	3.35292	0.00146151	0.184117	-1.15101
362.952	19.6639	0.000775716	3.35395	0.00149624	0.181531	-1.14663
363.381	19.5461	0.000774395	3.35498	0.00153189	0.178982	-1.14227
363.81	19.4275	0.000773069	3.356	0.00156845	0.17647	-1.13795
364.239	19.3081	0.000771737	3.35702	0.00160594	0.173994	-1.13364
364.667	19.1879	0.000770401	3.35804	0.00164436	0.171552	-1.12937
365.096	19.0669	0.00076906	3.35905	0.00168372	0.169146	-1.12512
365.525	18.9451	0.000767715	3.36006	0.00172402	0.166773	-1.12089
365.953	18.8225	0.000766367	3.36106	0.00176528	0.164434	-1.11668
366.382	18.6991	0.000765015	3.36206	0.0018075	0.162127	-1.1125
366.811	18.5749	0.000763661	3.36306	0.00185069	0.159853	-1.10833
367.239	18.4498	0.000762303	3.36405	0.00189486	0.15761	-1.10419
367.668	18.3239	0.000760944	3.36504	0.00194001	0.155399	-1.10006
368.097	18.1973	0.000759582	3.36603	0.00198615	0.153218	-1.09594
368.525	18.0697	0.000758218	3.36701	0.0020333	0.151067	-1.09184
368.954	17.9414	0.000756853	3.36798	0.00208146	0.148946	-1.08776
369.383	17.8122	0.000755487	3.36896	0.00213064	0.146854	-1.08369
369.811	17.6822	0.00075412	3.36992	0.00218085	0.144791	-1.07963
370.24	17.5513	0.000752752	3.37089	0.0022321	0.142755	-1.07558
370.669	17.4196	0.000751384	3.37184	0.00228439	0.140748	-1.07154
371.097	17.287	0.000750015	3.3728	0.00233773	0.138767	-1.06751
371.526	17.1535	0.000748647	3.37375	0.00239213	0.136814	-1.06349
371.955	17.0192	0.000747278	3.37469	0.00244761	0.134886	-1.05947
372.384	16.8839	0.000745911	3.37563	0.00250416	0.132985	-1.05546
372.812	16.7478	0.000744544	3.37657	0.00256179	0.131109	-1.05145
373.241	16.6108	0.000743178	3.3775	0.00262052	0.129258	-1.04745
373.67	16.4729	0.000741813	3.37843	0.00268034	0.127432	-1.04345
374.098	16.334	0.00074045	3.37935	0.00274127	0.12563	-1.03945
374.527	16.1943	0.000739088	3.38027	0.0028033	0.123852	-1.03544
374.956	16.0536	0.000737728	3.38118	0.00286644	0.122097	-1.03144
375.384	15.9119	0.00073637	3.38208	0.00293071	0.120365	-1.02743
375.813	15.7693	0.000735013	3.38299	0.00299609	0.118656	-1.02342
376.242	15.6258	0.00073366	3.38388	0.0030626	0.116969	-1.01941
376.67	15.4812	0.000732308	3.38478	0.00313023	0.115304	-1.01539
377.099	15.3357	0.00073096	3.38566	0.00319899	0.113659	-1.01136
377.528	15.1892	0.000729614	3.38655	0.00326888	0.112035	-1.00732
377.956	15.0416	0.000728271	3.38742	0.0033399	0.110428	-1.00327
378.385	14.893	0.000726931	3.3883	0.00341205	0.108836	-0.999213
378.814	14.7435	0.000725594	3.38916	0.00348532	0.107253	-0.99514
379.243	14.5928	0.000724261	3.39002	0.00355972	0.10567	-0.991054
379.671	14.4411	0.000722931	3.39088	0.00363524	0.104069	-0.986953
380.1	14.2884	0.000721605	3.39173	0.00371187	0.10243	-0.982834
380.529	14.1347	0.000720282	3.39258	0.00378961	0.100732	-0.978696
380.957	13.98	0.000718964	3.39342	0.00386845	0.0989688	-0.974538
381.386	13.8242	0.00071765	3.39425	0.00394838	0.0971564	-0.970357
381.815	13.6675	0.00071634	3.39508	0.00402939	0.0953213	-0.966153
382.243	13.5098	0.000715034	3.39591	0.00411147	0.0934874	-0.961923
382.672	13.3511	0.000713732	3.39673	0.00419461	0.0916705	-0.957667
383.101	13.1914	0.000712435	3.39754	0.00427879	0.0898791	-0.953383
383.529	13.0307	0.000711143	3.39835	0.004364	0.0881172	-0.949069
383.958	12.8688	0.000709855	3.39915	0.00445022	0.0863864	-0.944726
384.387	12.7059	0.000708572	3.39995	0.00453742	0.0846872	-0.940351
384.815	12.5418	0.000707295	3.40074	0.0046256	0.0830193	-0.935942
385.244	12.3766	0.000706022	3.40152	0.00471473	0.0813823	-0.931499
385.673	12.2101	0.000704754	3.4023	0.00480478	0.0797758	-0.927019
386.101	12.0425	0.000703492	3.40307	0.00489573	0.078199	-0.922502
386.53	11.8736	0.000702234	3.40384	0.00498755	0.0766515	-0.917944
386.959	11.7035	0.000700982	3.40461	0.00508022	0.0751325	-0.913346
387.388	11.532	0.000699736	3.40536	0.00517369	0.0736416	-0.908704
387.816	11.3593	0.000698495	3.40611	0.00526795	0.072178	-0.904016
388.245	11.1851	0.00069726	3.40686	0.00536295	0.0707413	-0.899282
388.674	11.0095	0.000696031	3.4076	0.00545865	0.069331	-0.894498
389.102	10.8326	0.000694807	3.40833	0.00555502	0.0679464	-0.889662
389.531	10.6541	0.000693589	3.40906	0.00565202	0.066587	-0.884773
389.96	10.4742	0.000692377	3.40978	0.00574959	0.0652523	-0.879827
390.388	10.2927	0.000691171	3.4105	0.00584769	0.0639419	-0.874823
390.817	10.1096	0.000689971	3.41121	0.00594628	0.0626552	-0.869757
391.246	9.92494	0.000688777	3.41191	0.00604529	0.0613918	-0.864628
391.674	9.73863	0.000687589	3.41261	0.00614467	0.0601512	-0.859431
392.103	9.55062	0.000686407	3.4133	0.00624437	0.0589328	-0.854164
392.532	9.36089	0.000685231	3.41399	0.00634431	0.0577364	-0.848825
392.96	9.16939	0.000684062	3.41467	0.00644445	0.0565614	-0.843409
393.389	8.97608	0.000682899	3.41534	0.0065447	0.0554075	-0.837914
393.818	8.78091	0.000681743	3.41601	0.006645	0.0542741	-0.832336
394.247	8.58384	0.000680592	3.41667	0.00674527	0.053161	-0.82667
394.675	8.38481	0.000679449	3.41733	0.00684543	0.0520676	-0.820914
395.104	8.18379	0.000678311	3.41798	0.0069454	0.0509937	-0.815063
395.533	7.98072	0.00067718	3.41863	0.00704509	0.0499388	-0.809113
395.961	7.77555	0.000676056	3.41927	0.00714442	0.0489025	-0.803059
396.39	7.56822	0.000674938	3.4199	0.00724327	0.0478845	-0.796896
396.819	7.35868	0.000673827	3.42053	0.00734156	0.0468844	-0.79062
397.247	7.14687	0.000672722	3.42115	0.00743918	0.0459019	-0.784226
397.676	6.93273	0.000671624	3.42177	0.00753602	0.0449366	-0.777707
398.105	6.71619	0.000670532	3.42238	0.00763196	0.0439881	-0.771059
398.533	6.49719	0.000669447	3.42298	0.00772689	0.0430562	-0.764275
398.962	6.27567	0.000668368	3.42358	0.00782067	0.0421405	-0.757349
399.391	6.05155	0.000667296	3.42418	0.00791317	0.0412407	-0.750274
399.819	5.82475	0.000666231	3.42477	0.00800426	0.0403564	-0.743044
400.248	5.59521	0.000665172	3.42535	0.00809379	0.0394874	-0.735651
400.677	5.36283	0.00066412	3.42593	0.0081816	0.0386333	-0.728087
401.105	5.12755	0.000663074	3.4265	0.00826754	0.0377939	-0.720346
401.534	4.88926	0.000662035	3.42707	0.00835144	0.0369688	-0.712418
401.963	4.64789	0.000661002	3.42763	0.00843312	0.0361578	-0.704295
402.392	4.40334	0.000659976	3.42819	0.00851241	0.0353605	-0.695968
402.82	4.15551	0.000658956	3.42874	0.0085891	0.0345767	-0.687429
403.249	3.9043	0.000657943	3.42929	0.008663	0.0338061	-0.678667
403.678	3.6496	0.000656935	3.42983	0.00873389	0.0330484	-0.669673
404.106	3.3913	0.000655935	3.43037	0.00880156	0.0323034	-0.660437
404.535	3.12929	0.00065494	3.43091	0.00886578	0.0315709	-0.650948
404.964	2.86345	0.000653951	3.43144	0.0089263	0.0308504	-0.641197
405.392	2.59366	0.000652969	3.43196	0.00898288	0.0301419	-0.631174
405.821	2.31978	0.000651992	3.43248	0.00903525	0.029445	-0.620867
406.25	2.0417	0.000651022	3.433	0.00908314	0.0287596	-0.610266
406.678	1.75926	0.000650057	3.43352	0.00912626	0.0280853	-0.599363
407.107	1.47233	0.000649099	3.43403	0.00916433	0.027422	-0.588146
407.536	1.18077	0.000648145	3.43454	0.00919705	0.0267695	-0.576608
407.964	0.884429	0.000647198	3.43504	0.00922409	0.0261276	-0.564741
408.393	0.583153	0.000646256	3.43554	0.00924514	0.0254959	-0.552537
408.822	0.276791	0.000645319	3.43604	0.00925987	0.0248745	-0.539992
409.251	-0.0348124	0.000644387	3.43654	0.00926795	0.024263	-0.527101
409.679	-0.351813	0.000643461	3.43703	0.00926903	0.0236613	-0.513862
410.108	-0.674366	0.000642539	3.43752	0.00926279	0.0230693	-0.500277
410.537	-1.00263	0.000641622	3.43802	0.00924889	0.0224869	-0.486349
410.965	-1.33675	0.00064071	3.4385	0.00922698	0.0219138	-0.472085
411.394	-1.67687	0.000639802	3.43899	0.00919676	0.02135	-0.457496
411.823	-2.02314	0.000638898	3.43948	0.00915791	0.0207953	-0.442597
412.251	-2.37569	0.000637999	3.43997	0.00911015	0.0202498	-0.427408
412.68	-2.73463	0.000637103	3.44045	0.00905321	0.0197134	-0.411952
413.109	-3.10009	0.000636212	3.44094	0.00898687	0.0191859	-0.396261
413.537	-3.47215	0.000635323	3.44143	0.00891093	0.0186674	-0.380369
413.966	-3.85088	0.000634438	3.44192	0.00882526	0.0181579	-0.364319
414.395	-4.23634	0.000633556	3.4424	0.00872976	0.0176574	-0.348157
414.823	-4.62856	0.000632677	3.44289	0.00862441	0.017166	-0.331935
415.252	-5.02754	0.0006318	3.44339	0.00850925	0.0166837	-0.31571
415.681	-5.43327	0.000630926	3.44388	0.00838439	0.0162106	-0.299544
416.109	-5.84569	0.000630054	3.44438	0.00825004	0.0157468	-0.283501
416.538	-6.26472	0.000629184	3.44488	0.00810648	0.0152925	-0.267649
416.967	-6.69024	0.000628315	3.44538	0.00795409	0.0148479	-0.252054
417.396	-7.12212	0.000627448	3.44589	0.00779332	0.014413	-0.236785
417.824	-7.56016	0.000626582	3.4464	0.00762471	0.013988	-0.221907
418.253	-8.00418	0.000625717	3.44691	0.0074489	0.0135733	-0.207482
418.682	-8.45392	0.000624852	3.44743	0.00726659	0.0131689	-0.193568
419.11	-8.90915	0.000623988	3.44795	0.00707854	0.0127751	-0.180215
419.539	-9.36956	0.000623124	3.44848	0.0068856	0.012392	-0.167467
419.968	-9.83487	0.00062226	3.44901	0.00668864	0.01202	-0.155361
420.396	-10.3048	0.000621396	3.44955	0.00648855	0.0116591	-0.143924
420.825	-10.7789	0.000620531	3.45009	0.00628627	0.0113097	-0.133175
421.254	-11.257	0.000619665	3.45063	0.00608273	0.0109719	-0.123124
421.682	-11.7387	0.000618799	3.45118	0.00587885	0.0106458	-0.113771
422.111	-12.2236	0.000617931	3.45174	0.00567553	0.0103316	-0.105111
422.54	-12.7114	0.000617063	3.4523	0.00547363	0.0100295	-0.097128
422.968	-13.2019	0.000616192	3.45287	0.00527397	0.00973957	-0.0898025
423.397	-13.6947	0.000615321	3.45344	0.0050773	0.00946193	-0.0831079
423.826	-14.1894	0.000614447	3.45401	0.00488433	0.00919665	-0.0770132
424.255	-14.6859	0.000613572	3.45459	0.00469569	0.00894379	-0.0714837
424.683	-15.1839	0.000612695	3.45518	0.00451191	0.00870339	-0.0664819
425.112	-15.6831	0.000611816	3.45577	0.00433348	0.00847547	-0.0619684
425.541	-16.1832	0.000610934	3.45636	0.00416079	0.00826004	-0.0579026
425.969	-16.6842	0.000610051	3.45695	0.00399415	0.00805707	-0.054244
426.398	-17.1857	0.000609165	3.45755	0.0038338	0.00786653	-0.0509521
426.827	-17.6876	0.000608277	3.45816	0.00367989	0.00768838	-0.0479876
427.255	-18.1898	0.000607387	3.45876	0.0035325	0.00752255	-0.0453127
427.684	-18.6921	0.000606495	3.45937	0.00339166	0.00736897	-0.0428916
428.113	-19.1944	0.0006056	3.45998	0.00325731	0.00722755	-0.0406907
428.541	-19.6966	0.000604703	3.4606	0.00312935	0.0070982	-0.038679
428.97	-20.1986	0.000603804	3.46121	0.00300762	0.00698083	-0.0368286
429.399	-20.7003	0.000602903	3.46183	0.00289192	0.00687532	-0.0351141
429.827	-21.2017	0.000601999	3.46245	0.00278202	0.00678155	-0.0335135
430.256	-21.7026	0.000601093	3.46307	0.00267764	0.00669942	-0.0320075
430.685	-22.2031	0.000600185	3.46369	0.00257849	0.00662879	-0.0305798
431.113	-22.7031	0.000599275	3.46432	0.00248428	0.00656956	-0.029217
431.542	-23.2026	0.000598363	3.46494	0.00239468	0.00652158	-0.0279081
431.971	-23.7014	0.000597449	3.46557	0.00230938	0.00648473	-0.0266445
432.4	-24.1997	0.000596533	3.46619	0.00222806	0.00645887	-0.0254198
432.828	-24.6973	0.000595615	3.46682	0.00215043	0.00644388	-0.0242294
433.257	-25.1943	0.000594696	3.46744	0.00207617	0.00643961	-0.02307
433.686	-25.6906	0.000593775	3.46807	0.00200502	0.00644591	-0.0219399
434.114	-26.1862	0.000592852	3.4687	0.00193672	0.00646265	-0.0208383
434.543	-26.6811	0.000591928	3.46933	0.00187101	0.00648965	-0.0197651
434.972	-27.1752	0.000591002	3.46995	0.00180769	0.00652676	-0.0187208
435.4	-27.6687	0.000590075	3.47058	0.00174654	0.00657381	-0.0177062
435.829	-28.1613	0.000589146	3.47121	0.0016874	0.00663061	-0.0167224
436.258	-28.6532	0.000588217	3.47184	0.00163011	0.00669696	-0.0157705
436.686	-29.1443	0.000587286	3.47246	0.00157452	0.00677264	-0.0148517
437.115	-29.6345	0.000586354	3.47309	0.00152052	0.00685742	-0.0139668
437.544	-30.124	0.000585421	3.47371	0.001468	0.00695105	-0.0131167
437.972	-30.6126	0.000584488	3.47434	0.00141689	0.00705326	-0.0123021
438.401	-31.1004	0.000583553	3.47496	0.0013671	0.00716373	-0.0115233
438.83	-31.5874	0.000582618	3.47559	0.00131858	0.00728214	-0.0107804
439.259	-32.0734	0.000581682	3.47621	0.00127128	0.00740813	-0.0100736
439.687	-32.5587	0.000580746	3.47683	0.00122516	0.0075413	-0.00940235
440.116	-33.0431	0.000579809	3.47746	0.00118019	0.00768121	-0.00876635
440.545	-33.5266	0.000578872	3.47808	0.00113635	0.00782739	-0.00816492
440.973	-34.0092	0.000577934	3.4787	0.00109362	0.00797934	-0.00759726
441.402	-34.4911	0.000576996	3.47932	0.00105197	0.00813649	-0.00706244
441.831	-34.972	0.000576058	3.47994	0.00101141	0.00829825	-0.00655942
442.259	-35.4521	0.00057512	3.48056	0.000971926	0.00846397	-0.00608707
442.688	-35.9314	0.000574182	3.48117	0.000933504	0.00863295	-0.00564419
443.117	-36.4099	0.000573243	3.48179	0.000896141	0.00880445	-0.00522953
443.545	-36.8876	0.000572305	3.4824	0.000859832	0.0089777	-0.00484183
443.974	-37.3644	0.000571367	3.48302	0.000824571	0.00915186	-0.00447978
444.403	-37.8405	0.000570429	3.48363	0.000790352	0.00932606	-0.00414209
444.831	-38.3159	0.000569492	3.48424	0.000757168	0.0094994	-0.00382748
445.26	-38.7905	0.000568555	3.48485	0.000725012	0.00967094	-0.00353467
445.689	-39.2644	0.000567618	3.48546	0.000693875	0.0098397	-0.00326242
446.117	-39.7376	0.000566682	3.48607	0.000663748	0.0100047	-0.00300952
446.546	-40.2101	0.000565746	3.48668	0.000634619	0.0101649	-0.00277481
446.975	-40.682	0.000564811	3.48728	0.000606477	0.0103194	-0.00255715
447.404	-41.1533	0.000563877	3.48789	0.000579308	0.0104671	-0.00235546
447.832	-41.624	0.000562944	3.48849	0.000553099	0.0106069	-0.00216871
448.261	-42.0941	0.000562011	3.48909	0.000527833	0.0107381	-0.00199591
448.69	-42.5636	0.000561079	3.48969	0.000503493	0.0108595	-0.00183612
449.118	-43.0327	0.000560148	3.49029	0.000480063	0.0109703	-0.00168845
449.547	-43.5013	0.000559219	3.49089	0.000457524	0.0110698	-0.00155207
449.976	-43.9694	0.00055829	3.49148	0.000435857	0.011157	-0.00142618
450.404	-44.437	0.000557362	3.49207	0.000415041	0.0112313	-0.00131003
450.833	-44.9043	0.000556435	3.49267	0.000395056	0.011292	-0.00120293
451.262	-45.3711	0.00055551	3.49326	0.000375881	0.0113387	-0.00110422
451.69	-45.8377	0.000554586	3.49385	0.000357494	0.0113709	-0.00101328
452.119	-46.3039	0.000553663	3.49443	0.000339875	0.0113882	-0.00092954
452.548	-46.7698	0.000552742	3.49502	0.000323	0.0113904	-0.000852459
452.976	-47.2354	0.000551822	3.4956	0.000306848	0.0113774	-0.000781536
453.405	-47.7008	0.000550904	3.49618	0.000291395	0.0113492	-0.000716304
453.834	-48.166	0.000549987	3.49676	0.000276621	0.0113057	-0.000656328
454.263	-48.6311	0.000549072	3.49734	0.000262503	0.0112472	-0.000601203
454.691	-49.096	0.000548158	3.49792	0.000249018	0.011174	-0.000550554
455.12	-49.5609	0.000547246	3.49849	0.000236144	0.0110863	-0.000504033
455.549	-50.0257	0.000546336	3.49907	0.000223861	0.0109847	-0.000461315
455.977	-50.4905	0.000545428	3.49964	0.000212146	0.0108695	-0.000422102
456.406	-50.9554	0.000544521	3.50021	0.000200979	0.0107414	-0.000386116
456.835	-51.4204	0.000543616	3.50078	0.000190338	0.010601	-0.0003531
457.263	-51.8855	0.000542713	3.50134	0.000180203	0.010449	-0.000322816
457.692	-52.3508	0.000541812	3.5019	0.000170556	0.0102861	-0.000295047
458.121	-52.8164	0.000540913	3.50247	0.000161375	0.010113	-0.000269589
458.549	-53.2823	0.000540016	3.50303	0.000152642	0.00993053	-0.000246256
458.978	-53.7487	0.000539121	3.50358	0.000144338	0.00973942	-0.000224875
459.407	-54.2154	0.000538228	3.50414	0.000136446	0.00954047	-0.000205287
459.835	-54.6827	0.000537337	3.50469	0.000128948	0.0093345	-0.000187346
460.264	-55.1506	0.000536449	3.50524	0.000121826	0.00912227	-0.000170918
460.693	-55.6192	0.000535562	3.50579	0.000115065	0.00890456	-0.000155878
461.121	-56.0885	0.000534678	3.50634	0.000108648	0.00868214	-0.000142113
461.55	-56.5587	0.000533796	3.50689	0.000102561	0.00845574	-0.000129517
461.979	-57.0298	0.000532917	3.50743	9.6787e-05	0.00822609	-0.000117993
462.408	-57.5018	0.000532039	3.50797	9.13132e-05	0.00799386	-0.000107454
462.836	-57.975	0.000531164	3.50851	8.61251e-05	0.00775973	-9.78164e-05
463.265	-58.4493	0.000530292	3.50905	8.12096e-05	0.00752432	-8.90068e-05
463.694	-58.9248	0.000529421	3.50959	7.65538e-05	0.00728824	-8.09559e-05
464.122	-59.4017	0.000528553	3.51012	7.21452e-05	0.00705204	-7.36005e-05
464.551	-59.88	0.000527688	3.51065	6.79722e-05	0.00681627	-6.68826e-05
464.98	-60.3598	0.000526825	3.51118	6.40232e-05	0.00658143	-6.0749e-05
465.408	-60.8412	0.000525965	3.51171	6.02874e-05	0.00634798	-5.51507e-05
465.837	-61.3242	0.000525107	3.51223	5.67543e-05	0.00611636	-5.00429e-05
466.266	-61.809	0.000524251	3.51276	5.34139e-05	0.00588697	-4.53844e-05
466.694	-62.2956	0.000523399	3.51328	5.02567e-05	0.00566019	-4.11374e-05
467.123	-62.784	0.000522548	3.5138	4.72734e-05	0.00543635	-3.72672e-05
467.552	-63.2744	0.000521701	3.51431	4.44553e-05	0.00521577	-3.3742e-05
467.98	-63.7668	0.000520856	3.51483	4.1794e-05	0.00499873	-3.05326e-05
468.409	-64.2612	0.000520013	3.51534	3.92815e-05	0.0047855	-2.76123e-05
468.838	-64.7576	0.000519174	3.51585	3.69103e-05	0.00457631	-2.49564e-05
469.267	-65.2561	0.000518337	3.51636	3.46729e-05	0.00437136	-2.25423e-05
469.695	-65.7567	0.000517502	3.51687	3.25625e-05	0.00417085	-2.03494e-05
470.124	-66.2593	0.00051667	3.51737	3.05725e-05	0.00397495	-1.83588e-05
470.553	-66.7639	0.000515841	3.51787	2.86965e-05	0.0037838	-1.65529e-05
470.981	-67.2704	0.000515015	3.51838	2.69286e-05	0.00359754	-1.49157e-05
471.41	-67.7788	0.000514192	3.51887	2.5263e-05	0.00341627	-1.34327e-05
471.839	-68.289	0.000513371	3.51937	2.36943e-05	0.00324009	-1.20903e-05
472.267	-68.8007	0.000512553	3.51986	2.22173e-05	0.00306909	-1.08762e-05
472.696	-69.3139	0.000511738	3.52036	2.08271e-05	0.00290333	-9.77911e-06
473.125	-69.8282	0.000510926	3.52085	1.9519e-05	0.00274288	-8.78855e-06
473.553	-70.3435	0.000510116	3.52134	1.82885e-05	0.00258778	-7.89502e-06
473.982	-70.8593	0.000509309	3.52182	1.71315e-05	0.00243806	-7.08977e-06
474.411	-71.3755	0.000508505	3.52231	1.60438e-05	0.00229376	-6.36477e-06
474.839	-71.8916	0.000507704	3.52279	1.50218e-05	0.00215488	-5.71267e-06
475.268	-72.407	0.000506906	3.52327	1.40616e-05	0.00202146	-5.12673e-06
475.697	-72.9214	0.00050611	3.52375	1.316e-05	0.00189347	-4.60076e-06
476.126	-73.4342	0.000505318	3.52422	1.23136e-05	0.00177093	-4.12911e-06
476.554	-73.9447	0.000504528	3.5247	1.15193e-05	0.00165382	-3.70659e-06
476.983	-74.4523	0.000503741	3.52517	1.07741e-05	0.00154212	-3.32845e-06
477.412	-74.9563	0.000502957	3.52564	1.00753e-05	0.0014358	-2.99035e-06
477.84	-75.4558	0.000502176	3.52611	9.42014e-06	0.00133482	-2.68834e-06
478.269	-75.9502	0.000501398	3.52657	8.80619e-06	0.00123913	-2.41878e-06
478.698	-76.4386	0.000500622	3.52704	8.23101e-06	0.00114867	-2.17837e-06
479.126	-76.92	0.00049985	3.5275	7.69234e-06	0.00106336	-1.96412e-06
479.555	-77.3937	0.00049908	3.52796	7.18802e-06	0.000983097	-1.77327e-06
479.984	-77.8588	0.000498314	3.52842	6.71602e-06	0.000907783	-1.60335e-06
480.412	-78.3142	0.00049755	3.52887	6.27441e-06	0.000837288	-1.45211e-06
480.841	-78.7594	0.000496789	3.52933	5.86135e-06	0.000771468	-1.31752e-06
481.27	-79.1932	0.000496031	3.52978	5.47512e-06	0.000710162	-1.19774e-06
481.698	-79.6151	0.000495276	3.53023	5.11407e-06	0.000653197	-1.09114e-06
482.127	-80.0243	0.000494524	3.53068	4.77665e-06	0.000600384	-9.96251e-07
482.556	-80.42	0.000493775	3.53113	4.46141e-06	0.000551526	-9.11747e-07
482.984	-80.8019	0.000493029	3.53157	4.16697e-06	0.000506417	-8.36465e-07
483.413	-81.1692	0.000492286	3.53201	3.892e-06	0.000464846	-7.69368e-07
483.842	-81.5218	0.000491545	3.53245	3.6353e-06	0.000426602	-7.09538e-07
484.271	-81.8592	0.000490808	3.53289	3.39569e-06	0.000391472	-6.56166e-07
484.699	-82.1814	0.000490073	3.53333	3.17209e-06	0.000359248	-6.08537e-07
485.128	-82.4881	0.000489342	3.53376	2.96348e-06	0.000329726	-5.66023e-07
485.557	-82.7795	0.000488613	3.5342	2.76888e-06	0.000302709	-5.2807e-07
485.985	-83.0555	0.000487887	3.53463	2.5874e-06	0.000278009	-4.94188e-07
486.414	-83.3165	0.000487164	3.53506	2.41819e-06	0.000255446	-4.63944e-07
486.843	-83.5627	0.000486445	3.53548	2.26044e-06	0.000234849	-4.36957e-07
487.271	-83.7944	0.000485728	3.53591	2.11342e-06	0.000216059	-4.12886e-07
487.7	-84.012	0.000485014	3.53633	1.97642e-06	0.000198925	-3.91428e-07
488.129	-84.216	0.000484302	3.53676	1.84878e-06	0.000183307	-3.72312e-07
488.557	-84.4068	0.000483594	3.53718	1.7299e-06	0.000169075	-3.55296e-07
488.986	-84.5851	0.000482889	3.53759	1.61919e-06	0.00015611	-3.40162e-07
489.415	-84.7514	0.000482187	3.53801	1.51612e-06	0.000144299	-3.26712e-07
489.843	-84.9062	0.000481487	3.53842	1.42018e-06	0.000133541	-3.14772e-07
490.272	-85.0502	0.00048079	3.53884	1.33091e-06	0.000123743	-3.04182e-07
490.701	-85.1839	0.000480097	3.53925	1.24786e-06	0.000114818	-2.94797e-07
491.13	-85.3079	0.000479406	3.53966	1.17062e-06	0.000106687	-2.8649e-07
491.558	-85.4228	0.000478718	3.54006	1.0988e-06	9.92796e-05	-2.79143e-07
491.987	-85.5291	0.000478033	3.54047	1.03204e-06	9.25294e-05	-2.72652e-07
492.416	-85.6275	0.000477351	3.54087	9.70007e-07	8.6377e-05	-2.66923e-07
492.844	-85.7183	0.000476672	3.54127	9.1238e-07	8.07682e-05	-2.61873e-07
493.273	-85.8022	0.000475995	3.54167	8.58864e-07	7.56535e-05	-2.57425e-07
493.702	-85.8797	0.000475321	3.54207	8.09184e-07	7.09882e-05	-2.53513e-07
494.13	-85.9511	0.000474651	3.54247	7.63082e-07	6.67313e-05	-2.50077e-07
494.559	-86.0169	0.000473983	3.54286	7.20317e-07	6.28459e-05	-2.47064e-07
494.988	-86.0776	0.000473318	3.54326	6.80664e-07	5.92982e-05	-2.44425e-07
495.416	-86.1335	0.000472656	3.54365	6.43912e-07	5.60576e-05	-2.4212e-07
495.845	-86.1849	0.000471996	3.54404	6.09865e-07	5.30965e-05	-2.4011e-07
496.274	-86.2323	0.00047134	3.54442	5.78339e-07	5.03895e-05	-2.38362e-07
496.702	-86.276	0.000470686	3.54481	5.49165e-07	4.79137e-05	-2.36847e-07
497.131	-86.3162	0.000470035	3.54519	5.22181e-07	4.56484e-05	-2.35539e-07
497.56	-86.3532	0.000469386	3.54558	4.97238e-07	4.35746e-05	-2.34415e-07
497.988	-86.3872	0.000468741	3.54596	4.74199e-07	4.16752e-05	-2.33455e-07
498.417	-86.4186	0.000468098	3.54634	4.52933e-07	3.99344e-05	-2.32639e-07
498.846	-86.4475	0.000467458	3.54671	4.3332e-07	3.83383e-05	-2.31953e-07
499.275	-86.4741	0.000466821	3.54709	4.15246e-07	3.68737e-05	-2.31382e-07
499.703	-86.4987	0.000466187	3.54746	3.98607e-07	3.55291e-05	-2.30913e-07
500.132	-86.5213	0.000465555	3.54783	3.83305e-07	3.42938e-05	-2.30535e-07
500.561	-86.5422	0.000464926	3.54821	3.69249e-07	3.3158e-05	-2.30239e-07
500.989	-86.5615	0.0004643	3.54857	3.56353e-07	3.21129e-05	-2.30015e-07
501.418	-86.5793	0.000463676	3.54894	3.44539e-07	3.11505e-05	-2.29855e-07
501.847	-86.5958	0.000463055	3.54931	3.33732e-07	3.02635e-05	-2.29753e-07
502.275	-86.611	0.000462437	3.54967	3.23865e-07	2.94452e-05	-2.29703e-07
502.704	-86.6251	0.000461822	3.55003	3.14872e-07	2.86896e-05	-2.29698e-07
503.133	-86.6382	0.000461209	3.55039	3.06694e-07	2.79912e-05	-2.29733e-07
503.561	-86.6503	0.000460599	3.55075	2.99277e-07	2.73449e-05	-2.29805e-07
503.99	-86.6616	0.000459991	3.55111	2.92567e-07	2.67462e-05	-2.29909e-07
504.419	-86.6721	0.000459387	3.55147	2.86516e-07	2.61908e-05	-2.30042e-07
504.847	-86.6818	0.000458784	3.55182	2.81081e-07	2.56751e-05	-2.302e-07
505.276	-86.6909	0.000458185	3.55217	2.76219e-07	2.51956e-05	-2.30381e-07
505.705	-86.6994	0.000457588	3.55252	2.7189e-07	2.47491e-05	-2.30581e-07
506.134	-86.7073	0.000456993	3.55287	2.6806e-07	2.43327e-05	-2.308e-07
506.562	-86.7148	0.000456401	3.55322	2.64694e-07	2.39438e-05	-2.31033e-07
506.991	-86.7217	0.000455812	3.55357	2.6176e-07	2.358e-05	-2.31281e-07
507.42	-86.7282	0.000455226	3.55391	2.59229e-07	2.32392e-05	-2.3154e-07
507.848	-86.7344	0.000454642	3.55426	2.57075e-07	2.29194e-05	-2.3181e-07
508.277	-86.7402	0.00045406	3.5546	2.55271e-07	2.26187e-05	-2.32088e-07
508.706	-86.7456	0.000453481	3.55494	2.53794e-07	2.23356e-05	-2.32375e-07
509.134	-86.7508	0.000452905	3.55528	2.52621e-07	2.20685e-05	-2.32668e-07
509.563	-86.7557	0.000452331	3.55561	2.51733e-07	2.1816e-05	-2.32967e-07
509.992	-86.7603	0.000451759	3.55595	2.5111e-07	2.15769e-05	-2.3327e-07
510.42	-86.7647	0.00045119	3.55628	2.50734e-07	2.13501e-05	-2.33578e-07
510.849	-86.7689	0.000450624	3.55661	2.50588e-07	2.11345e-05	-2.33888e-07
511.278	-86.7729	0.00045006	3.55695	2.50658e-07	2.09292e-05	-2.34201e-07
511.706	-86.7768	0.000449498	3.55728	2.50927e-07	2.07333e-05	-2.34516e-07
512.135	-86.7804	0.000448939	3.5576	2.51384e-07	2.0546e-05	-2.34832e-07
512.564	-86.784	0.000448383	3.55793	2.52016e-07	2.03666e-05	-2.35149e-07
512.992	-86.7873	0.000447829	3.55825	2.5281e-07	2.01944e-05	-2.35466e-07
513.421	-86.7906	0.000447277	3.55858	2.53755e-07	2.00289e-05	-2.35783e-07
513.85	-86.7937	0.000446728	3.5589	2.54842e-07	1.98694e-05	-2.361e-07
514.279	-86.7968	0.000446181	3.55922	2.56061e-07	1.97156e-05	-2.36416e-07
514.707	-86.7997	0.000445636	3.55954	2.57403e-07	1.95669e-05	-2.36731e-07
515.136	-86.8026	0.000445094	3.55986	2.5886e-07	1.94229e-05	-2.37044e-07
515.565	-86.8053	0.000444554	3.56017	2.60424e-07	1.92832e-05	-2.37356e-07
515.993	-86.808	0.000444017	3.56049	2.62087e-07	1.91475e-05	-2.37667e-07
516.422	-86.8106	0.000443482	3.5608	2.63843e-07	1.90155e-05	-2.37975e-07
516.851	-86.8132	0.000442949	3.56111	2.65686e-07	1.88869e-05	-2.38281e-07
517.279	-86.8157	0.000442419	3.56142	2.67609e-07	1.87615e-05	-2.38585e-07
517.708	-86.8181	0.000441891	3.56173	2.69608e-07	1.86389e-05	-2.38887e-07
518.137	-86.8205	0.000441365	3.56204	2.71676e-07	1.85189e-05	-2.39186e-07
518.565	-86.8228	0.000440842	3.56234	2.73809e-07	1.84014e-05	-2.39483e-07
518.994	-86.8251	0.000440321	3.56265	2.76003e-07	1.82862e-05	-2.39776e-07
519.423	-86.8274	0.000439802	3.56295	2.78252e-07	1.81731e-05	-2.40067e-07
519.851	-86.8296	0.000439286	3.56325	2.80554e-07	1.8062e-05	-2.40356e-07
520.28	-86.8318	0.000438771	3.56355	2.82905e-07	1.79527e-05	-2.40641e-07
520.709	-86.8339	0.000438259	3.56385	2.853e-07	1.78451e-05	-2.40923e-07
521.138	-86.836	0.00043775	3.56415	2.87737e-07	1.7739e-05	-2.41203e-07
521.566	-86.8381	0.000437242	3.56445	2.90212e-07	1.76344e-05	-2.41479e-07
521.995	-86.8402	0.000436737	3.56474	2.92723e-07	1.75312e-05	-2.41752e-07
522.424	-86.8422	0.000436234	3.56504	2.95267e-07	1.74292e-05	-2.42022e-07
522.852	-86.8442	0.000435733	3.56533	2.97841e-07	1.73285e-05	-2.4229e-07
523.281	-86.8462	0.000435234	3.56562	3.00443e-07	1.72289e-05	-2.42554e-07
523.71	-86.8482	0.000434738	3.56591	3.03071e-07	1.71303e-05	-2.42815e-07
524.138	-86.8501	0.000434244	3.5662	3.05722e-07	1.70327e-05	-2.43072e-07
524.567	-86.852	0.000433752	3.56648	3.08394e-07	1.69361e-05	-2.43327e-07
524.996	-86.8539	0.000433262	3.56677	3.11086e-07	1.68403e-05	-2.43579e-07
525.424	-86.8558	0.000432774	3.56705	3.13796e-07	1.67454e-05	-2.43827e-07
525.853	-86.8577	0.000432288	3.56734	3.16522e-07	1.66512e-05	-2.44073e-07
526.282	-86.8596	0.000431804	3.56762	3.19262e-07	1.65578e-05	-2.44315e-07
526.71	-86.8614	0.000431323	3.5679	3.22015e-07	1.64652e-05	-2.44554e-07
527.139	-86.8632	0.000430844	3.56818	3.24779e-07	1.63732e-05	-2.4479e-07
527.568	-86.865	0.000430366	3.56845	3.27554e-07	1.62818e-05	-2.45024e-07
527.996	-86.8668	0.000429891	3.56873	3.30338e-07	1.61911e-05	-2.45254e-07
528.425	-86.8686	0.000429418	3.56901	3.33129e-07	1.6101e-05	-2.45481e-07
528.854	-86.8704	0.000428947	3.56928	3.35926e-07	1.60114e-05	-2.45705e-07
529.283	-86.8722	0.000428478	3.56955	3.38729e-07	1.59224e-05	-2.45927e-07
529.711	-86.8739	0.000428011	3.56982	3.41536e-07	1.58339e-05	-2.46145e-07
530.14	-86.8756	0.000427547	3.57009	3.44347e-07	1.5746e-05	-2.4636e-07
530.569	-86.8774	0.000427084	3.57036	3.47159e-07	1.56585e-05	-2.46573e-07
530.997	-86.8791	0.000426623	3.57063	3.49974e-07	1.55715e-05	-2.46783e-07
531.426	-86.8808	0.000426164	3.5709	3.52789e-07	1.5485e-05	-2.4699e-07
531.855	-86.8825	0.000425707	3.57116	3.55603e-07	1.53989e-05	-2.47194e-07
532.283	-86.8842	0.000425253	3.57142	3.58417e-07	1.53132e-05	-2.47395e-07
532.712	-86.8859	0.0004248	3.57169	3.61229e-07	1.5228e-05	-2.47594e-07
533.141	-86.8875	0.000424349	3.57195	3.64039e-07	1.51432e-05	-2.4779e-07
533.569	-86.8892	0.0004239	3.57221	3.66845e-07	1.50588e-05	-2.47983e-07
533.998	-86.8908	0.000423453	3.57247	3.69648e-07	1.49749e-05	-2.48174e-07
534.427	-86.8925	0.000423008	3.57272	3.72446e-07	1.48913e-05	-2.48362e-07
534.855	-86.8941	0.000422565	3.57298	3.75239e-07	1.4808e-05	-2.48547e-07
535.284	-86.8957	0.000422124	3.57324	3.78027e-07	1.47252e-05	-2.4873e-07
535.713	-86.8974	0.000421685	3.57349	3.80809e-07	1.46427e-05	-2.4891e-07
536.142	-86.899	0.000421247	3.57374	3.83584e-07	1.45606e-05	-2.49088e-07
536.57	-86.9006	0.000420812	3.57399	3.86353e-07	1.44789e-05	-2.49264e-07
536.999	-86.9022	0.000420379	3.57424	3.89113e-07	1.43975e-05	-2.49436e-07
537.428	-86.9038	0.000419947	3.57449	3.91866e-07	1.43164e-05	-2.49607e-07
537.856	-86.9053	0.000419517	3.57474	3.9461e-07	1.42357e-05	-2.49775e-07
538.285	-86.9069	0.000419089	3.57499	3.97346e-07	1.41554e-05	-2.49941e-07
538.714	-86.9085	0.000418663	3.57523	4.00072e-07	1.40753e-05	-2.50104e-07
539.142	-86.91	0.000418239	3.57548	4.02788e-07	1.39956e-05	-2.50265e-07
539.571	-86.9116	0.000417817	3.57572	4.05495e-07	1.39162e-05	-2.50424e-07
540	-86.9131	0.000417396	3.57596	4.08191e-07	1.38372e-05	-2.5058e-07
540.428	-86.9147	0.000416978	3.57621	4.10876e-07	1.37585e-05	-2.50735e-07
540.857	-86.9162	0.000416561	3.57645	4.13551e-07	1.368e-05	-2.50887e-07
541.286	-86.9177	0.000416146	3.57668	4.16214e-07	1.36019e-05	-2.51037e-07
541.714	-86.9192	0.000415733	3.57692	4.18865e-07	1.35241e-05	-2.51184e-07
542.143	-86.9207	0.000415321	3.57716	4.21505e-07	1.34467e-05	-2.5133e-07
542.572	-86.9222	0.000414911	3.57739	4.24132e-07	1.33695e-05	-2.51474e-07
543	-86.9237	0.000414503	3.57763	4.26747e-07	1.32926e-05	-2.51615e-07
543.429	-86.9252	0.000414097	3.57786	4.29349e-07	1.32161e-05	-2.51754e-07
543.858	-86.9267	0.000413693	3.57809	4.31938e-07	1.31398e-05	-2.51892e-07
544.287	-86.9282	0.00041329	3.57832	4.34515e-07	1.30638e-05	-2.52027e-07
544.715	-86.9296	0.000412889	3.57855	4.37077e-07	1.29882e-05	-2.52161e-07
545.144	-86.9311	0.00041249	3.57878	4.39626e-07	1.29128e-05	-2.52292e-07
545.573	-86.9325	0.000412093	3.57901	4.42162e-07	1.28377e-05	-2.52422e-07
546.001	-86.934	0.000411697	3.57924	4.44683e-07	1.27629e-05	-2.5255e-07
546.43	-86.9354	0.000411303	3.57946	4.4719e-07	1.26884e-05	-2.52675e-07
546.859	-86.9369	0.00041091	3.57969	4.49683e-07	1.26142e-05	-2.52799e-07
547.287	-86.9383	0.00041052	3.57991	4.52161e-07	1.25403e-05	-2.52922e-07
547.716	-86.9397	0.000410131	3.58013	4.54624e-07	1.24666e-05	-2.53042e-07
548.145	-86.9411	0.000409743	3.58035	4.57073e-07	1.23933e-05	-2.5316e-07
548.573	-86.9425	0.000409358	3.58057	4.59507e-07	1.23202e-05	-2.53277e-07
549.002	-86.9439	0.000408974	3.58079	4.61925e-07	1.22474e-05	-2.53392e-07
549.431	-86.9453	0.000408591	3.58101	4.64329e-07	1.21749e-05	-2.53506e-07
549.859	-86.9467	0.00040821	3.58123	4.66717e-07	1.21026e-05	-2.53617e-07
550.288	-86.9481	0.000407831	3.58144	4.69089e-07	1.20306e-05	-2.53727e-07
550.717	-86.9495	0.000407454	3.58166	4.71446e-07	1.19589e-05	-2.53836e-07
551.146	-86.9509	0.000407078	3.58187	4.73787e-07	1.18875e-05	-2.53942e-07
551.574	-86.9522	0.000406704	3.58209	4.76113e-07	1.18164e-05	-2.54048e-07
552.003	-86.9536	0.000406331	3.5823	4.78423e-07	1.17455e-05	-2.54151e-07
552.432	-86.9549	0.00040596	3.58251	4.80716e-07	1.16749e-05	-2.54253e-07
552.86	-86.9563	0.00040559	3.58272	4.82994e-07	1.16045e-05	-2.54354e-07
553.289	-86.9576	0.000405223	3.58293	4.85256e-07	1.15345e-05	-2.54452e-07
553.718	-86.959	0.000404856	3.58313	4.87501e-07	1.14647e-05	-2.5455e-07
554.146	-86.9603	0.000404491	3.58334	4.8973e-07	1.13951e-05	-2.54646e-07
554.575	-86.9616	0.000404128	3.58355	4.91943e-07	1.13258e-05	-2.5474e-07
555.004	-86.963	0.000403767	3.58375	4.9414e-07	1.12568e-05	-2.54833e-07
555.432	-86.9643	0.000403406	3.58395	4.9632e-07	1.11881e-05	-2.54925e-07
555.861	-86.9656	0.000403048	3.58416	4.98484e-07	1.11196e-05	-2.55015e-07
556.29	-86.9669	0.000402691	3.58436	5.00632e-07	1.10513e-05	-2.55104e-07
556.718	-86.9682	0.000402335	3.58456	5.02763e-07	1.09833e-05	-2.55191e-07
557.147	-86.9695	0.000401981	3.58476	5.04878e-07	1.09156e-05	-2.55277e-07
557.576	-86.9708	0.000401629	3.58496	5.06976e-07	1.08481e-05	-2.55362e-07
558.004	-86.9721	0.000401278	3.58516	5.09058e-07	1.07809e-05	-2.55445e-07
558.433	-86.9733	0.000400928	3.58535	5.11123e-07	1.0714e-05	-2.55527e-07
558.862	-86.9746	0.00040058	3.58555	5.13172e-07	1.06473e-05	-2.55608e-07
559.291	-86.9759	0.000400233	3.58574	5.15204e-07	1.05808e-05	-2.55687e-07
559.719	-86.9771	0.000399888	3.58594	5.17219e-07	1.05146e-05	-2.55766e-07
560.148	-86.9784	0.000399544	3.58613	5.19219e-07	1.04486e-05	-2.55843e-07
560.577	-86.9796	0.000399202	3.58632	5.21201e-07	1.03829e-05	-2.55918e-07
561.005	-86.9809	0.000398861	3.58651	5.23168e-07	1.03175e-05	-2.55993e-07
561.434	-86.9821	0.000398522	3.5867	5.25117e-07	1.02523e-05	-2.56066e-07
561.863	-86.9834	0.000398184	3.58689	5.27051e-07	1.01873e-05	-2.56138e-07
562.291	-86.9846	0.000397848	3.58708	5.28968e-07	1.01226e-05	-2.56209e-07
562.72	-86.9858	0.000397513	3.58727	5.30868e-07	1.00581e-05	-2.56279e-07
563.149	-86.987	0.000397179	3.58746	5.32753e-07	9.99386e-06	-2.56348e-07
563.577	-86.9882	0.000396847	3.58764	5.34621e-07	9.92986e-06	-2.56416e-07
564.006	-86.9895	0.000396516	3.58783	5.36472e-07	9.86611e-06	-2.56482e-07
564.435	-86.9907	0.000396186	3.58801	5.38308e-07	9.80259e-06	-2.56548e-07
564.863	-86.9919	0.000395858	3.58819	5.40127e-07	9.73931e-06	-2.56612e-07
565.292	-86.9931	0.000395532	3.58838	5.4193e-07	9.67628e-06	-2.56675e-07
565.721	-86.9942	0.000395206	3.58856	5.43717e-07	9.61347e-06	-2.56738e-07
566.15	-86.9954	0.000394882	3.58874	5.45488e-07	9.55091e-06	-2.56799e-07
566.578	-86.9966	0.00039456	3.58892	5.47243e-07	9.48857e-06	-2.56859e-07
567.007	-86.9978	0.000394239	3.58909	5.48982e-07	9.42648e-06	-2.56918e-07
567.436	-86.999	0.000393919	3.58927	5.50706e-07	9.36461e-06	-2.56976e-07
567.864	-87.0001	0.0003936	3.58945	5.52413e-07	9.30298e-06	-2.57034e-07
568.293	-87.0013	0.000393283	3.58962	5.54105e-07	9.24158e-06	-2.5709e-07
568.722	-87.0024	0.000392967	3.5898	5.55781e-07	9.18041e-06	-2.57145e-07
569.15	-87.0036	0.000392653	3.58997	5.57442e-07	9.11946e-06	-2.57199e-07
569.579	-87.0047	0.000392339	3.59015	5.59087e-07	9.05875e-06	-2.57253e-07
570.008	-87.0059	0.000392027	3.59032	5.60716e-07	8.99827e-06	-2.57305e-07
570.436	-87.007	0.000391717	3.59049	5.6233e-07	8.93801e-06	-2.57357e-07
570.865	-87.0081	0.000391407	3.59066	5.63929e-07	8.87797e-06	-2.57408e-07
571.294	-87.0093	0.000391099	3.59083	5.65513e-07	8.81816e-06	-2.57457e-07
571.722	-87.0104	0.000390792	3.591	5.67081e-07	8.75858e-06	-2.57506e-07
572.151	-87.0115	0.000390487	3.59117	5.68635e-07	8.69922e-06	-2.57554e-07
572.58	-87.0126	0.000390183	3.59133	5.70173e-07	8.64008e-06	-2.57602e-07
573.008	-87.0137	0.00038988	3.5915	5.71697e-07	8.58116e-06	-2.57648e-07
573.437	-87.0148	0.000389578	3.59167	5.73205e-07	8.52246e-06	-2.57694e-07
573.866	-87.0159	0.000389278	3.59183	5.74699e-07	8.46399e-06	-2.57738e-07
574.295	-87.017	0.000388978	3.59199	5.76179e-07	8.40573e-06	-2.57782e-07
574.723	-87.0181	0.00038868	3.59216	5.77643e-07	8.34769e-06	-2.57825e-07
575.152	-87.0192	0.000388384	3.59232	5.79094e-07	8.28986e-06	-2.57868e-07
575.581	-87.0203	0.000388088	3.59248	5.8053e-07	8.23226e-06	-2.57909e-07
576.009	-87.0214	0.000387794	3.59264	5.81951e-07	8.17486e-06	-2.5795e-07
576.438	-87.0225	0.000387501	3.5928	5.83359e-07	8.11769e-06	-2.5799e-07
576.867	-87.0235	0.000387209	3.59296	5.84752e-07	8.06072e-06	-2.5803e-07
577.295	-87.0246	0.000386919	3.59312	5.86131e-07	8.00397e-06	-2.58068e-07
577.724	-87.0257	0.000386629	3.59327	5.87497e-07	7.94743e-06	-2.58106e-07
578.153	-87.0267	0.000386341	3.59343	5.88848e-07	7.89111e-06	-2.58143e-07
578.581	-87.0278	0.000386054	3.59359	5.90186e-07	7.83499e-06	-2.5818e-07
579.01	-87.0288	0.000385768	3.59374	5.91511e-07	7.77908e-06	-2.58215e-07
579.439	-87.0299	0.000385483	3.59389	5.92821e-07	7.72338e-06	-2.5825e-07
579.867	-87.0309	0.0003852	3.59405	5.94119e-07	7.66789e-06	-2.58285e-07
580.296	-87.0319	0.000384917	3.5942	5.95403e-07	7.61261e-06	-2.58319e-07
580.725	-87.033	0.000384636	3.59435	5.96674e-07	7.55753e-06	-2.58352e-07
581.154	-87.034	0.000384356	3.5945	5.97931e-07	7.50266e-06	-2.58384e-07
581.582	-87.035	0.000384077	3.59465	5.99176e-07	7.44799e-06	-2.58416e-07
582.011	-87.036	0.0003838	3.5948	6.00408e-07	7.39353e-06	-2.58447e-07
582.44	-87.037	0.000383523	3.59495	6.01627e-07	7.33927e-06	-2.58477e-07
582.868	-87.0381	0.000383248	3.5951	6.02833e-07	7.28521e-06	-2.58507e-07
583.297	-87.0391	0.000382973	3.59525	6.04026e-07	7.23136e-06	-2.58537e-07
583.726	-87.0401	0.0003827	3.59539	6.05207e-07	7.1777e-06	-2.58565e-07
584.154	-87.0411	0.000382428	3.59554	6.06376e-07	7.12425e-06	-2.58593e-07
584.583	-87.0421	0.000382157	3.59568	6.07532e-07	7.07099e-06	-2.58621e-07
585.012	-87.043	0.000381887	3.59583	6.08676e-07	7.01793e-06	-2.58648e-07
585.44	-87.044	0.000381619	3.59597	6.09808e-07	6.96507e-06	-2.58674e-07
585.869	-87.045	0.000381351	3.59611	6.10928e-07	6.91241e-06	-2.587e-07
586.298	-87.046	0.000381084	3.59625	6.12036e-07	6.85994e-06	-2.58725e-07
586.726	-87.047	0.000380819	3.5964	6.13132e-07	6.80767e-06	-2.5875e-07
587.155	-87.0479	0.000380555	3.59654	6.14217e-07	6.75559e-06	-2.58774e-07
587.584	-87.0489	0.000380291	3.59668	6.1529e-07	6.70371e-06	-2.58798e-07
588.012	-87.0499	0.000380029	3.59681	6.16351e-07	6.65202e-06	-2.58821e-07
588.441	-87.0508	0.000379768	3.59695	6.17401e-07	6.60052e-06	-2.58843e-07
588.87	-87.0518	0.000379508	3.59709	6.1844e-07	6.54922e-06	-2.58866e-07
589.299	-87.0527	0.000379249	3.59723	6.19467e-07	6.4981e-06	-2.58887e-07
589.727	-87.0537	0.000378991	3.59736	6.20484e-07	6.44718e-06	-2.58908e-07
590.156	-87.0546	0.000378734	3.5975	6.21489e-07	6.39644e-06	-2.58929e-07
590.585	-87.0556	0.000378478	3.59763	6.22484e-07	6.3459e-06	-2.58949e-07
591.013	-87.0565	0.000378223	3.59777	6.23467e-07	6.29554e-06	-2.58968e-07
591.442	-87.0574	0.000377969	3.5979	6.2444e-07	6.24537e-06	-2.58988e-07
591.871	-87.0584	0.000377716	3.59803	6.25402e-07	6.19538e-06	-2.59006e-07
592.299	-87.0593	0.000377465	3.59816	6.26354e-07	6.14558e-06	-2.59025e-07
592.728	-87.0602	0.000377214	3.59829	6.27296e-07	6.09597e-06	-2.59042e-07
593.157	-87.0611	0.000376964	3.59842	6.28227e-07	6.04654e-06	-2.5906e-07
593.585	-87.0621	0.000376716	3.59855	6.29148e-07	5.9973e-06	-2.59077e-07
594.014	-87.063	0.000376468	3.59868	6.30058e-07	5.94823e-06	-2.59093e-07
594.443	-87.0639	0.000376221	3.59881	6.30959e-07	5.89935e-06	-2.59109e-07
594.871	-87.0648	0.000375975	3.59894	6.3185e-07	5.85065e-06	-2.59125e-07
595.3	-87.0657	0.000375731	3.59907	6.32731e-07	5.80213e-06	-2.5914e-07
595.729	-87.0666	0.000375487	3.59919	6.33602e-07	5.7538e-06	-2.59155e-07
596.158	-87.0675	0.000375244	3.59932	6.34464e-07	5.70564e-06	-2.59169e-07
596.586	-87.0684	0.000375002	3.59944	6.35316e-07	5.65766e-06	-2.59183e-07
597.015	-87.0693	0.000374762	3.59957	6.36158e-07	5.60985e-06	-2.59197e-07
597.444	-87.0701	0.000374522	3.59969	6.36992e-07	5.56223e-06	-2.5921e-07
597.872	-87.071	0.000374283	3.59981	6.37816e-07	5.51478e-06	-2.59223e-07
598.301	-87.0719	0.000374045	3.59993	6.3863e-07	5.46751e-06	-2.59235e-07
598.73	-87.0728	0.000373808	3.60006	6.39436e-07	5.42041e-06	-2.59247e-07
599.158	-87.0736	0.000373572	3.60018	6.40233e-07	5.37349e-06	-2.59259e-07
599.587	-87.0745	0.000373337	3.6003	6.41021e-07	5.32674e-06	-2.5927e-07
600	-87.0753	0.000373111	3.60041	6.41771e-07	5.28187e-06	-2.59281e-07
600	-87.0753	0.000373111	3.60041	6.41771e-07	5.28361e-06	-2.59281e-07
600.387	-56.4348	0.000372902	3.60052	1.08618e-06	0.0028075	-1.77705e-05
600.835	-44.2596	0.000372662	3.60064	7.31658e-05	0.0102299	-0.000855043
601.258	-13.3747	0.000372443	3.60075	0.00136911	0.0396989	-0.0585001
601.645	24.0571	0.000372309	3.59887	0.178233	0.551285	-1.86213
602.069	26.8929	0.000372326	3.58611	0.604196	1.24739	-2.77877
602.492	28.9322	0.000372797	3.55808	1.05073	1.83523	-2.97346
602.916	30.2942	0.000374208	3.5168	1.36983	2.30133	-2.90611
603.339	31.1004	0.000377223	3.46816	1.48466	2.64671	-2.74161
603.763	31.4704	0.000382682	3.4185	1.44971	2.88234	-2.53431
604.186	31.5004	0.00039164	3.37114	1.36206	3.024	-2.29784
604.61	31.2616	0.00040545	3.32699	1.26583	3.08855	-2.03501
605.033	30.8072	0.000425689	3.28609	1.17292	3.09186	-1.76269
605.457	30.1875	0.000453696	3.2483	1.08586	3.04825	-1.52817
605.88	29.4639	0.000489826	3.21344	1.00488	2.97067	-1.38973
606.304	28.7062	0.000533143	3.1813	0.929685	2.87069	-1.36913
606.727	27.9749	0.000581947	3.15172	0.859893	2.75794	-1.44068
607.151	27.309	0.000634519	3.12453	0.795108	2.63978	-1.56198
607.574	26.7268	0.000689487	3.09957	0.734959	2.52134	-1.69905
607.998	26.2328	0.00074586	3.07667	0.6791	2.406	-1.83184
608.421	25.8232	0.000802938	3.0557	0.627208	2.29579	-1.95074
608.845	25.491	0.000860218	3.03651	0.578983	2.19185	-2.05231
609.268	25.2275	0.000917322	3.01899	0.534147	2.09469	-2.13626
609.692	25.0239	0.000973956	3.00301	0.492441	2.00439	-2.20379
610.115	24.8721	0.00102988	2.98846	0.453623	1.92077	-2.2567
610.539	24.7644	0.0010849	2.97524	0.417465	1.84352	-2.29691
610.962	24.6942	0.00113885	2.96327	0.383758	1.77221	-2.32625
611.385	24.6555	0.00119158	2.95244	0.352301	1.70637	-2.3464
611.809	24.6433	0.00124296	2.94269	0.322908	1.64553	-2.35884
612.232	24.6531	0.00129291	2.93395	0.295399	1.58924	-2.36485
612.656	24.681	0.00134131	2.92614	0.269606	1.53705	-2.36553
613.079	24.7238	0.00138809	2.91922	0.245365	1.48856	-2.36183
613.503	24.7786	0.00143318	2.91312	0.22252	1.44338	-2.35453
613.926	24.843	0.00147653	2.90779	0.200916	1.40119	-2.3443
614.35	24.915	0.00151808	2.90321	0.180404	1.36166	-2.33173
614.773	24.9928	0.00155779	2.89932	0.160842	1.32452	-2.31728
615.197	25.075	0.00159563	2.8961	0.142097	1.28954	-2.30137
615.62	25.1602	0.00163156	2.89352	0.12406	1.25649	-2.28434
616.044	25.2475	0.00166555	2.89155	0.106672	1.22517	-2.26647
616.467	25.3358	0.0016976	2.89018	0.0899666	1.19543	-2.24798
616.891	25.4244	0.00172768	2.88937	0.0741299	1.16712	-2.22905
617.314	25.5126	0.0017558	2.88908	0.059539	1.14009	-2.20977
617.738	25.5999	0.00178196	2.88927	0.0466979	1.11424	-2.19019
618.161	25.6856	0.0018062	2.88987	0.0360275	1.08946	-2.17031
618.585	25.7693	0.00182858	2.8908	0.0276402	1.06567	-2.15012
619.008	25.8507	0.00184917	2.89199	0.0213074	1.04278	-2.12964
619.432	25.9292	0.00186807	2.89336	0.0166185	1.02072	-2.1089
619.855	26.0046	0.00188537	2.89488	0.0131541	0.999435	-2.08799
620.279	26.0767	0.00190118	2.89651	0.0105711	0.978866	-2.06699
620.702	26.1453	0.00191559	2.89822	0.00861705	0.958963	-2.04599
621.126	26.2103	0.00192869	2.89999	0.00711422	0.939684	-2.02506
621.549	26.2715	0.00194057	2.90181	0.00593939	0.920992	-2.00428
621.973	26.329	0.00195131	2.90366	0.00500684	0.902853	-1.98371
622.396	26.3826	0.00196098	2.90555	0.00425627	0.885237	-1.96339
622.82	26.4325	0.00196965	2.90746	0.00364467	0.868117	-1.94335
623.243	26.4787	0.00197739	2.9094	0.00314081	0.851471	-1.92364
623.667	26.5211	0.00198426	2.91135	0.00272167	0.835276	-1.90426
624.09	26.5598	0.0019903	2.91332	0.00237001	0.819513	-1.88523
624.514	26.595	0.00199557	2.9153	0.00207271	0.804166	-1.86657
624.937	26.6266	0.00200011	2.91729	0.00181969	0.789216	-1.84829
625.361	26.6548	0.00200397	2.91929	0.00160303	0.774651	-1.83037
625.784	26.6796	0.00200719	2.92129	0.00141653	0.760455	-1.81283
626.207	26.701	0.0020098	2.92331	0.00125521	0.746617	-1.79567
626.631	26.7192	0.00201184	2.92533	0.00111506	0.733123	-1.77887
627.054	26.7343	0.00201335	2.92735	0.000992825	0.719962	-1.76245
627.478	26.7463	0.00201435	2.92938	0.000885838	0.707123	-1.74638
627.901	26.7552	0.00201487	2.93141	0.000791893	0.694597	-1.73067
628.325	26.7613	0.00201494	2.93344	0.000709156	0.682372	-1.7153
628.748	26.7644	0.00201458	2.93548	0.000636093	0.670441	-1.70028
629.172	26.7648	0.00201383	2.93752	0.000571413	0.658792	-1.68559
629.595	26.7625	0.00201269	2.93956	0.000514023	0.647419	-1.67123
630.019	26.7575	0.00201119	2.9416	0.000462994	0.636311	-1.65718
630.442	26.7499	0.00200936	2.94364	0.000417533	0.625462	-1.64345
630.866	26.7398	0.00200721	2.94569	0.000376959	0.614864	-1.63002
631.289	26.7272	0.00200475	2.94773	0.000340685	0.604507	-1.61688
631.713	26.7122	0.00200201	2.94978	0.000308206	0.594387	-1.60402
632.136	26.6949	0.00199899	2.95182	0.000279081	0.584495	-1.59145
632.56	26.6753	0.00199573	2.95386	0.000252929	0.574824	-1.57914
632.983	26.6535	0.00199222	2.95591	0.000229415	0.565368	-1.5671
633.407	26.6295	0.00198848	2.95795	0.00020825	0.55612	-1.55532
633.83	26.6033	0.00198453	2.96	0.000189175	0.547075	-1.54378
634.254	26.5752	0.00198038	2.96204	0.000171968	0.538225	-1.53248
634.677	26.5449	0.00197604	2.96408	0.000156428	0.529566	-1.52142
635.101	26.5127	0.00197151	2.96612	0.000142382	0.521092	-1.51059
635.524	26.4786	0.00196682	2.96816	0.000129674	0.512797	-1.49998
635.948	26.4426	0.00196197	2.9702	0.000118168	0.504676	-1.48958
636.371	26.4047	0.00195696	2.97224	0.00010774	0.496725	-1.47939
636.795	26.3651	0.00195181	2.97427	9.82838e-05	0.488937	-1.46941
637.218	26.3237	0.00194653	2.97631	8.97014e-05	0.481308	-1.45962
637.642	26.2805	0.00194112	2.97834	8.1907e-05	0.473834	-1.45003
638.065	26.2357	0.0019356	2.98037	7.48236e-05	0.466511	-1.44062
638.489	26.1892	0.00192996	2.98241	6.83823e-05	0.459333	-1.43139
638.912	26.1412	0.00192422	2.98443	6.25214e-05	0.452298	-1.42234
639.336	26.0915	0.00191838	2.98646	5.71855e-05	0.4454	-1.41346
639.759	26.0403	0.00191245	2.98849	5.23249e-05	0.438636	-1.40474
640.183	25.9876	0.00190643	2.99051	4.78951e-05	0.432002	-1.39618
640.606	25.9334	0.00190034	2.99253	4.38557e-05	0.425496	-1.38779
641.029	25.8777	0.00189417	2.99455	4.01707e-05	0.419112	-1.37954
641.453	25.8207	0.00188793	2.99657	3.68073e-05	0.412848	-1.37144
641.876	25.7622	0.00188162	2.99858	3.37362e-05	0.406701	-1.36349
642.3	25.7024	0.00187526	3.0006	3.09307e-05	0.400668	-1.35567
642.723	25.6412	0.00186884	3.00261	2.83668e-05	0.394745	-1.34799
643.147	25.5787	0.00186236	3.00462	2.60229e-05	0.388929	-1.34044
643.57	25.5149	0.00185584	3.00662	2.38791e-05	0.383218	-1.33303
643.994	25.4499	0.00184928	3.00863	2.19178e-05	0.37761	-1.32573
644.417	25.3836	0.00184268	3.01063	2.01227e-05	0.372101	-1.31856
644.841	25.3161	0.00183604	3.01263	1.84792e-05	0.366688	-1.31151
645.264	25.2474	0.00182936	3.01463	1.69741e-05	0.361371	-1.30457
645.688	25.1775	0.00182266	3.01662	1.55951e-05	0.356145	-1.29774
646.111	25.1065	0.00181593	3.01861	1.43314e-05	0.351009	-1.29102
646.535	25.0343	0.00180918	3.0206	1.3173e-05	0.345961	-1.28441
646.958	24.961	0.0018024	3.02259	1.21108e-05	0.340998	-1.2779
647.382	24.8866	0.00179561	3.02458	1.11365e-05	0.336119	-1.27149
647.805	24.8111	0.00178879	3.02656	1.02427e-05	0.331322	-1.26517
648.229	24.7346	0.00178197	3.02854	9.42244e-06	0.326603	-1.25895
648.652	24.657	0.00177513	3.03051	8.6695e-06	0.321963	-1.25283
649.076	24.5783	0.00176828	3.03249	7.9782e-06	0.317398	-1.24679
649.499	24.4987	0.00176143	3.03446	7.34333e-06	0.312908	-1.24084
649.923	24.418	0.00175457	3.03643	6.76016e-06	0.30849	-1.23498
650.346	24.3364	0.00174771	3.0384	6.22436e-06	0.304143	-1.2292
650.77	24.2537	0.00174084	3.04036	5.73197e-06	0.299866	-1.2235
651.193	24.1701	0.00173398	3.04232	5.27939e-06	0.295656	-1.21787
651.617	24.0856	0.00172711	3.04428	4.8633e-06	0.291512	-1.21233
652.04	24.0001	0.00172025	3.04623	4.48069e-06	0.287433	-1.20685
652.464	23.9136	0.00171339	3.04818	4.12881e-06	0.283418	-1.20145
652.887	23.8263	0.00170654	3.05013	3.80511e-06	0.279465	-1.19612
653.311	23.7381	0.0016997	3.05208	3.50729e-06	0.275573	-1.19086
653.734	23.6489	0.00169286	3.05402	3.23324e-06	0.27174	-1.18567
654.158	23.5589	0.00168603	3.05596	2.98101e-06	0.267966	-1.18053
654.581	23.4679	0.00167922	3.0579	2.74882e-06	0.264249	-1.17547
655.005	23.3761	0.00167241	3.05983	2.53506e-06	0.260588	-1.17046
655.428	23.2835	0.00166562	3.06176	2.33822e-06	0.256982	-1.16551
655.851	23.19	0.00165884	3.06369	2.15694e-06	0.25343	-1.16062
656.275	23.0956	0.00165208	3.06561	1.98997e-06	0.24993	-1.15579
656.698	23.0004	0.00164533	3.06753	1.83615e-06	0.246483	-1.15101
657.122	22.9044	0.0016386	3.06945	1.69443e-06	0.243086	-1.14629
657.545	22.8075	0.00163189	3.07137	1.56384e-06	0.239739	-1.14162
657.969	22.7099	0.0016252	3.07328	1.44349e-06	0.23644	-1.13699
658.392	22.6114	0.00161852	3.07519	1.33256e-06	0.23319	-1.13242
658.816	22.512	0.00161186	3.07709	1.23031e-06	0.229987	-1.12789
659.239	22.4119	0.00160523	3.07899	1.13605e-06	0.22683	-1.12341
659.663	22.311	0.00159861	3.08089	1.04914e-06	0.223718	-1.11898
660.086	22.2093	0.00159201	3.08279	9.68998e-07	0.220651	-1.11459
660.51	22.1068	0.00158544	3.08468	8.95096e-07	0.217628	-1.11024
660.933	22.0035	0.00157889	3.08657	8.26941e-07	0.214647	-1.10593
661.357	21.8994	0.00157236	3.08845	7.64081e-07	0.211709	-1.10166
661.78	21.7946	0.00156586	3.09033	7.06102e-07	0.208812	-1.09743
662.204	21.6889	0.00155938	3.09221	6.52621e-07	0.205956	-1.09324
662.627	21.5825	0.00155293	3.09409	6.03288e-07	0.20314	-1.08909
663.051	21.4753	0.00154649	3.09596	5.5778e-07	0.200363	-1.08496
663.474	21.3673	0.00154009	3.09783	5.15799e-07	0.197625	-1.08088
663.898	21.2586	0.00153371	3.09969	4.77073e-07	0.194925	-1.07682
664.321	21.1491	0.00152735	3.10155	4.41351e-07	0.192263	-1.0728
664.745	21.0388	0.00152102	3.10341	4.084e-07	0.189637	-1.06881
665.168	20.9277	0.00151472	3.10526	3.78009e-07	0.187047	-1.06485
665.592	20.8159	0.00150844	3.10711	3.49981e-07	0.184493	-1.06092
666.015	20.7033	0.0015022	3.10896	3.24135e-07	0.181973	-1.05701
666.439	20.5899	0.00149597	3.1108	3.00307e-07	0.179489	-1.05313
666.862	20.4758	0.00148978	3.11264	2.78343e-07	0.177037	-1.04928
667.286	20.3608	0.00148361	3.11448	2.58104e-07	0.17462	-1.04545
667.709	20.2452	0.00147747	3.11631	2.39459e-07	0.172235	-1.04164
668.133	20.1287	0.00147136	3.11814	2.22289e-07	0.169882	-1.03786
668.556	20.0115	0.00146528	3.11996	2.06487e-07	0.167561	-1.0341
668.98	19.8935	0.00145922	3.12178	1.9195e-07	0.165271	-1.03036
669.403	19.7747	0.00145319	3.1236	1.78586e-07	0.163011	-1.02664
669.827	19.6551	0.00144719	3.12541	1.66311e-07	0.160782	-1.02294
670.25	19.5347	0.00144122	3.12722	1.55046e-07	0.158583	-1.01925
670.673	19.4136	0.00143528	3.12903	1.44719e-07	0.156413	-1.01559
671.097	19.2917	0.00142937	3.13083	1.35265e-07	0.154272	-1.01194
671.52	19.1689	0.00142349	3.13263	1.26624e-07	0.152159	-1.0083
671.944	19.0454	0.00141763	3.13442	1.18739e-07	0.150074	-1.00468
672.367	18.9211	0.0014118	3.13621	1.11559e-07	0.148017	-1.00107
672.791	18.7959	0.00140601	3.138	1.0504e-07	0.145986	-0.997477
673.214	18.67	0.00140024	3.13978	9.91371e-08	0.143983	-0.993893
673.638	18.5432	0.0013945	3.14156	9.38127e-08	0.142005	-0.990319
674.061	18.4157	0.00138879	3.14334	8.90312e-08	0.140054	-0.986756
674.485	18.2873	0.00138311	3.14511	8.47603e-08	0.138128	-0.983201
674.908	18.158	0.00137745	3.14688	8.09709e-08	0.136227	-0.979654
675.332	18.028	0.00137183	3.14864	7.76364e-08	0.134351	-0.976115
675.755	17.8971	0.00136624	3.1504	7.4733e-08	0.132499	-0.972581
676.179	17.7653	0.00136067	3.15216	7.22392e-08	0.130671	-0.969053
676.602	17.6327	0.00135513	3.15391	7.01356e-08	0.128866	-0.96553
677.026	17.4992	0.00134963	3.15565	6.84051e-08	0.127085	-0.962009
677.449	17.3649	0.00134415	3.1574	6.70323e-08	0.125327	-0.958492
677.873	17.2297	0.0013387	3.15914	6.60039e-08	0.123591	-0.954976
678.296	17.0936	0.00133328	3.16087	6.53081e-08	0.121878	-0.951462
678.72	16.9566	0.00132789	3.16261	6.49348e-08	0.120187	-0.947947
679.143	16.8187	0.00132253	3.16433	6.48754e-08	0.118517	-0.944431
679.567	16.6799	0.00131719	3.16606	6.51228e-08	0.116868	-0.940913
679.99	16.5402	0.00131189	3.16778	6.56712e-08	0.11524	-0.937392
680.414	16.3996	0.00130661	3.16949	6.65161e-08	0.113633	-0.933868
680.837	16.258	0.00130136	3.1712	6.76543e-08	0.112046	-0.930339
681.261	16.1155	0.00129614	3.17291	6.90836e-08	0.110479	-0.926804
681.684	15.972	0.00129095	3.17461	7.08031e-08	0.108932	-0.923263
682.108	15.8275	0.00128579	3.17631	7.28129e-08	0.107404	-0.919714
682.531	15.6821	0.00128066	3.17801	7.51142e-08	0.105895	-0.916156
682.955	15.5357	0.00127555	3.1797	7.7709e-08	0.104405	-0.912589
683.378	15.3883	0.00127047	3.18138	8.06004e-08	0.102933	-0.909012
683.802	15.2399	0.00126542	3.18307	8.37924e-08	0.101478	-0.905422
684.225	15.0905	0.0012604	3.18475	8.729e-08	0.100039	-0.90182
684.649	14.94	0.00125541	3.18642	9.10989e-08	0.0986133	-0.898205
685.072	14.7885	0.00125044	3.18809	9.52259e-08	0.0971972	-0.894574
685.495	14.6359	0.0012455	3.18976	9.96783e-08	0.0957828	-0.890927
685.919	14.4823	0.00124059	3.19142	1.04465e-07	0.0943572	-0.887264
686.342	14.3276	0.0012357	3.19307	1.09594e-07	0.0929015	-0.883581
686.766	14.1719	0.00123085	3.19473	1.15076e-07	0.0913956	-0.879879
687.189	14.0151	0.00122602	3.19638	1.20923e-07	0.0898299	-0.876155
687.613	13.8574	0.00122122	3.19802	1.27145e-07	0.0882142	-0.872409
688.036	13.6986	0.00121644	3.19966	1.33754e-07	0.0865716	-0.868638
688.46	13.5388	0.00121169	3.2013	1.40764e-07	0.084925	-0.864842
688.883	13.3779	0.00120697	3.20293	1.48187e-07	0.0832904	-0.86102
689.307	13.2161	0.00120227	3.20456	1.56039e-07	0.0816766	-0.85717
689.73	13.0531	0.00119761	3.20618	1.64334e-07	0.0800879	-0.853291
690.154	12.8891	0.00119296	3.2078	1.73089e-07	0.0785261	-0.849383
690.577	12.724	0.00118835	3.20941	1.82321e-07	0.0769919	-0.845443
691.001	12.5577	0.00118376	3.21102	1.92047e-07	0.0754851	-0.841472
691.424	12.3902	0.00117919	3.21263	2.02285e-07	0.0740055	-0.837467
691.848	12.2216	0.00117465	3.21423	2.13055e-07	0.0725526	-0.833427
692.271	12.0517	0.00117014	3.21583	2.24376e-07	0.0711261	-0.829351
692.695	11.8806	0.00116566	3.21742	2.36268e-07	0.0697254	-0.825237
693.118	11.7082	0.00116119	3.21901	2.48754e-07	0.06835	-0.821084
693.542	11.5345	0.00115676	3.2206	2.61854e-07	0.0669995	-0.816889
693.965	11.3594	0.00115235	3.22218	2.75592e-07	0.0656733	-0.812652
694.389	11.183	0.00114796	3.22375	2.8999e-07	0.0643711	-0.808371
694.812	11.0052	0.0011436	3.22532	3.05074e-07	0.0630923	-0.804044
695.236	10.826	0.00113927	3.22689	3.20866e-07	0.0618365	-0.799669
695.659	10.6454	0.00113495	3.22845	3.37394e-07	0.0606032	-0.795243
696.083	10.4632	0.00113067	3.23001	3.54682e-07	0.0593921	-0.790766
696.506	10.2796	0.00112641	3.23157	3.72758e-07	0.0582027	-0.786234
696.93	10.0944	0.00112217	3.23312	3.91648e-07	0.0570346	-0.781646
697.353	9.90759	0.00111796	3.23466	4.1138e-07	0.0558875	-0.776999
697.777	9.71918	0.00111377	3.2362	4.31983e-07	0.0547608	-0.77229
698.2	9.52913	0.0011096	3.23774	4.53485e-07	0.0536542	-0.767518
698.624	9.33738	0.00110546	3.23927	4.75915e-07	0.0525674	-0.762679
699.047	9.1439	0.00110134	3.2408	4.99303e-07	0.0515	-0.757771
699.471	8.94866	0.00109724	3.24232	5.23678e-07	0.0504515	-0.75279
699.894	8.75162	0.00109317	3.24384	5.4907e-07	0.0494217	-0.747734
700.317	8.55272	0.00108912	3.24535	5.7551e-07	0.0484102	-0.742599
700.741	8.35194	0.0010851	3.24686	6.03028e-07	0.0474166	-0.737383
701.164	8.14923	0.0010811	3.24837	6.31653e-07	0.0464407	-0.732081
701.588	7.94453	0.00107712	3.24987	6.61416e-07	0.0454821	-0.726689
702.011	7.73781	0.00107316	3.25137	6.92346e-07	0.0445403	-0.721204
702.435	7.52902	0.00106923	3.25286	7.24473e-07	0.0436153	-0.715623
702.858	7.3181	0.00106531	3.25435	7.57824e-07	0.0427065	-0.709939
703.282	7.10501	0.00106142	3.25583	7.92429e-07	0.0418138	-0.70415
703.705	6.88969	0.00105755	3.25731	8.28313e-07	0.0409368	-0.69825
704.129	6.67208	0.00105371	3.25878	8.65502e-07	0.0400752	-0.692235
704.552	6.45214	0.00104988	3.26026	9.04021e-07	0.0392287	-0.686099
704.976	6.22979	0.00104608	3.26172	9.43891e-07	0.038397	-0.679837
705.399	6.00497	0.0010423	3.26318	9.85135e-07	0.0375799	-0.673443
705.823	5.77763	0.00103854	3.26464	1.02777e-06	0.0367771	-0.666912
706.246	5.54769	0.0010348	3.26609	1.07181e-06	0.0359882	-0.660238
706.67	5.31509	0.00103108	3.26754	1.11727e-06	0.0352131	-0.653414
707.093	5.07975	0.00102739	3.26898	1.16416e-06	0.0344514	-0.646433
707.517	4.8416	0.00102371	3.27042	1.21248e-06	0.033703	-0.639289
707.94	4.60056	0.00102005	3.27186	1.26223e-06	0.0329675	-0.631974
708.364	4.35655	0.00101642	3.27329	1.31342e-06	0.0322446	-0.624482
708.787	4.10949	0.0010128	3.27471	1.36602e-06	0.0315342	-0.616804
709.211	3.85928	0.00100921	3.27613	1.42004e-06	0.030836	-0.608934
709.634	3.60584	0.00100563	3.27755	1.47543e-06	0.0301498	-0.600862
710.058	3.34908	0.00100208	3.27896	1.53218e-06	0.0294753	-0.592581
710.481	3.0889	0.000998543	3.28037	1.59024e-06	0.0288123	-0.584083
710.905	2.82519	0.000995027	3.28177	1.64958e-06	0.0281606	-0.57536
711.328	2.55785	0.00099153	3.28317	1.71013e-06	0.0275199	-0.566403
711.752	2.28678	0.000988053	3.28457	1.77182e-06	0.0268901	-0.557204
712.175	2.01187	0.000984595	3.28596	1.83458e-06	0.0262708	-0.547755
712.599	1.733	0.000981156	3.28734	1.89832e-06	0.0256621	-0.53805
713.022	1.45005	0.000977735	3.28872	1.96292e-06	0.0250635	-0.52808
713.446	1.16291	0.000974333	3.2901	2.02829e-06	0.024475	-0.517839
713.869	0.871452	0.000970949	3.29147	2.09427e-06	0.0238964	-0.507322
714.292	0.575556	0.000967584	3.29284	2.16073e-06	0.0233275	-0.496523
714.716	0.275096	0.000964237	3.2942	2.2275e-06	0.022768	-0.48544
715.139	-0.0300543	0.000960908	3.29556	2.29439e-06	0.022218	-0.474071
715.563	-0.34002	0.000957597	3.29692	2.3612e-06	0.0216771	-0.462414
715.986	-0.654927	0.000954303	3.29827	2.42771e-06	0.0211453	-0.450472
716.41	-0.974898	0.000951027	3.29961	2.49369e-06	0.0206224	-0.438249
716.833	-1.30005	0.000947768	3.30095	2.55889e-06	0.0201084	-0.425752
717.257	-1.63051	0.000944526	3.30229	2.62302e-06	0.0196031	-0.41299
717.68	-1.96638	0.000941302	3.30362	2.6858e-06	0.0191064	-0.399977
718.104	-2.30776	0.000938094	3.30495	2.74691e-06	0.0186182	-0.386729
718.527	-2.65474	0.000934903	3.30627	2.80605e-06	0.0181385	-0.373268
718.951	-3.00742	0.000931729	3.30759	2.86287e-06	0.0176672	-0.359617
719.374	-3.36586	0.000928571	3.3089	2.91703e-06	0.0172044	-0.345805
719.798	-3.73012	0.000925429	3.31021	2.96819e-06	0.0167498	-0.331867
720.221	-4.10024	0.000922304	3.31152	3.01598e-06	0.0163037	-0.317839
720.645	-4.47623	0.000919194	3.31282	3.06007e-06	0.0158659	-0.303762
721.068	-4.8581	0.000916101	3.31412	3.10011e-06	0.0154365	-0.289683
721.492	-5.24583	0.000913023	3.31541	3.13578e-06	0.0150156	-0.275648
721.915	-5.63937	0.00090996	3.3167	3.16676e-06	0.0146033	-0.261708
722.339	-6.03866	0.000906913	3.31798	3.19279e-06	0.0141995	-0.247917
722.762	-6.4436	0.000903881	3.31926	3.21362e-06	0.0138044	-0.234328
723.186	-6.85408	0.000900865	3.32053	3.22905e-06	0.0134181	-0.220993
723.609	-7.26996	0.000897863	3.3218	3.23893e-06	0.0130407	-0.207965
724.033	-7.69107	0.000894876	3.32307	3.24315e-06	0.0126724	-0.195294
724.456	-8.11722	0.000891905	3.32433	3.24168e-06	0.0123132	-0.183027
724.88	-8.54821	0.000888947	3.32558	3.23454e-06	0.0119634	-0.171206
725.303	-8.98382	0.000886005	3.32684	3.22182e-06	0.011623	-0.159868
725.727	-9.42379	0.000883077	3.32808	3.20366e-06	0.0112922	-0.149045
726.15	-9.86789	0.000880163	3.32933	3.18028e-06	0.0109712	-0.138763
726.574	-10.3158	0.000877264	3.33057	3.15196e-06	0.01066	-0.12904
726.997	-10.7674	0.000874379	3.3318	3.11903e-06	0.0103589	-0.119889
727.421	-11.2222	0.000871508	3.33303	3.08186e-06	0.0100679	-0.111316
727.844	-11.68	0.000868652	3.33426	3.04088e-06	0.00978711	-0.103321
728.268	-12.1407	0.000865809	3.33548	2.99653e-06	0.00951671	-0.0958957
728.691	-12.6037	0.000862981	3.33669	2.9493e-06	0.00925675	-0.0890299
729.114	-13.069	0.000860166	3.33791	2.89968e-06	0.00900731	-0.0827066
729.538	-13.5363	0.000857366	3.33911	2.84817e-06	0.00876846	-0.0769051
729.961	-14.0053	0.000854579	3.34032	2.79526e-06	0.00854023	-0.0716012
730.385	-14.4757	0.000851806	3.34152	2.74146e-06	0.00832267	-0.0667678
730.808	-14.9475	0.000849047	3.34271	2.68723e-06	0.00811579	-0.0623759
731.232	-15.4202	0.000846302	3.3439	2.63303e-06	0.00791961	-0.0583948
731.655	-15.8939	0.00084357	3.34509	2.57926e-06	0.00773411	-0.0547929
732.079	-16.3682	0.000840852	3.34627	2.52633e-06	0.00755928	-0.0515383
732.502	-16.843	0.000838148	3.34745	2.47457e-06	0.00739509	-0.0485991
732.926	-17.3181	0.000835458	3.34862	2.42429e-06	0.00724149	-0.0459442
733.349	-17.7936	0.000832781	3.34979	2.37575e-06	0.00709844	-0.0435431
733.773	-18.2691	0.000830118	3.35095	2.32916e-06	0.00696588	-0.0413668
734.196	-18.7446	0.000827468	3.35211	2.2847e-06	0.00684374	-0.0393877
734.62	-19.22	0.000824832	3.35327	2.24248e-06	0.00673195	-0.0375801
735.043	-19.6952	0.00082221	3.35442	2.20259e-06	0.00663043	-0.03592
735.467	-20.1702	0.000819601	3.35556	2.16504e-06	0.0065391	-0.0343857
735.89	-20.6448	0.000817005	3.35671	2.12982e-06	0.00645788	-0.0329576
736.314	-21.1191	0.000814423	3.35784	2.0969e-06	0.00638667	-0.0316183
736.737	-21.5929	0.000811855	3.35898	2.06616e-06	0.00632538	-0.0303525
737.161	-22.0663	0.0008093	3.36011	2.03751e-06	0.00627392	-0.0291473
737.584	-22.5391	0.000806758	3.36123	2.01079e-06	0.00623219	-0.0279917
738.008	-23.0115	0.000804229	3.36235	1.98583e-06	0.0062001	-0.0268767
738.431	-23.4832	0.000801714	3.36347	1.96244e-06	0.00617754	-0.0257952
738.855	-23.9544	0.000799212	3.36458	1.94043e-06	0.00616443	-0.0247416
739.278	-24.4249	0.000796724	3.36569	1.9196e-06	0.00616064	-0.0237119
739.702	-24.8949	0.000794248	3.36679	1.89972e-06	0.00616609	-0.0227034
740.125	-25.3642	0.000791786	3.36789	1.88059e-06	0.00618066	-0.0217144
740.549	-25.8328	0.000789337	3.36898	1.862e-06	0.00620424	-0.0207441
740.972	-26.3008	0.000786901	3.37008	1.84377e-06	0.00623672	-0.0197924
741.396	-26.7681	0.000784478	3.37116	1.82571e-06	0.00627797	-0.0188598
741.819	-27.2347	0.000782068	3.37224	1.80765e-06	0.00632787	-0.0179472
742.243	-27.7005	0.000779671	3.37332	1.78942e-06	0.00638629	-0.0170555
742.666	-28.1657	0.000777287	3.37439	1.77091e-06	0.00645306	-0.0161861
743.09	-28.6301	0.000774916	3.37546	1.75197e-06	0.00652805	-0.0153403
743.513	-29.0938	0.000772557	3.37653	1.73253e-06	0.00661107	-0.0145191
743.936	-29.5567	0.000770212	3.37759	1.71248e-06	0.00670195	-0.0137239
744.36	-30.0189	0.000767879	3.37865	1.69176e-06	0.00680047	-0.0129556
744.783	-30.4803	0.000765559	3.3797	1.67032e-06	0.00690643	-0.0122151
745.207	-30.9409	0.000763251	3.38075	1.64814e-06	0.00701958	-0.0115029
745.63	-31.4008	0.000760957	3.38179	1.62518e-06	0.00713965	-0.0108197
746.054	-31.8598	0.000758674	3.38283	1.60145e-06	0.00726637	-0.0101656
746.477	-32.3181	0.000756405	3.38387	1.57695e-06	0.0073994	-0.00954068
746.901	-32.7756	0.000754147	3.3849	1.55169e-06	0.00753842	-0.00894495
747.324	-33.2322	0.000751902	3.38593	1.52572e-06	0.00768304	-0.00837812
747.748	-33.6881	0.00074967	3.38695	1.49905e-06	0.00783285	-0.00783979
748.171	-34.1432	0.000747449	3.38797	1.47174e-06	0.00798741	-0.00732942
748.595	-34.5975	0.000745241	3.38899	1.44384e-06	0.00814625	-0.00684637
749.018	-35.0511	0.000743046	3.39	1.41539e-06	0.00830885	-0.00638991
749.442	-35.5038	0.000740862	3.391	1.38646e-06	0.00847465	-0.00595923
749.865	-35.9558	0.00073869	3.39201	1.3571e-06	0.00864307	-0.00555343
750.289	-36.4071	0.000736531	3.39301	1.32738e-06	0.00881348	-0.00517161
750.712	-36.8576	0.000734383	3.394	1.29736e-06	0.00898521	-0.00481278
751.136	-37.3074	0.000732248	3.39499	1.2671e-06	0.00915757	-0.00447597
751.559	-37.7564	0.000730124	3.39598	1.23666e-06	0.00932981	-0.00416018
751.983	-38.2048	0.000728012	3.39696	1.2061e-06	0.00950118	-0.00386441
752.406	-38.6525	0.000725912	3.39794	1.17548e-06	0.00967088	-0.00358767
752.83	-39.0995	0.000723824	3.39891	1.14487e-06	0.00983809	-0.00332898
753.253	-39.5459	0.000721747	3.39989	1.11431e-06	0.010002	-0.00308737
753.677	-39.9917	0.000719682	3.40085	1.08386e-06	0.0101617	-0.00286191
754.1	-40.4369	0.000717628	3.40182	1.05357e-06	0.0103164	-0.00265167
754.524	-40.8815	0.000715586	3.40277	1.02348e-06	0.0104652	-0.00245579
754.947	-41.3256	0.000713555	3.40373	9.93641e-07	0.0106072	-0.0022734
755.371	-41.7691	0.000711536	3.40468	9.64096e-07	0.0107417	-0.00210369
755.794	-42.2121	0.000709528	3.40563	9.34881e-07	0.0108677	-0.00194589
756.218	-42.6546	0.000707531	3.40657	9.06032e-07	0.0109846	-0.00179923
756.641	-43.0967	0.000705546	3.40751	8.7758e-07	0.0110915	-0.00166302
757.065	-43.5383	0.000703572	3.40844	8.49556e-07	0.0111878	-0.00153658
757.488	-43.9794	0.000701608	3.40938	8.21985e-07	0.0112728	-0.00141926
757.912	-44.4202	0.000699656	3.4103	7.94893e-07	0.0113459	-0.00131047
758.335	-44.8606	0.000697715	3.41123	7.68299e-07	0.0114066	-0.00120962
758.758	-45.3007	0.000695784	3.41215	7.42222e-07	0.0114544	-0.00111619
759.182	-45.7405	0.000693865	3.41306	7.16678e-07	0.011489	-0.00102967
759.605	-46.1799	0.000691956	3.41398	6.91681e-07	0.01151	-0.000949565
760.029	-46.6191	0.000690058	3.41488	6.67242e-07	0.0115173	-0.000875443
760.452	-47.058	0.000688171	3.41579	6.43371e-07	0.0115107	-0.000806879
760.876	-47.4967	0.000686295	3.41669	6.20074e-07	0.0114901	-0.00074348
761.299	-47.9352	0.000684429	3.41759	5.97356e-07	0.0114557	-0.000684875
761.723	-48.3735	0.000682573	3.41848	5.75222e-07	0.0114074	-0.000630722
762.146	-48.8117	0.000680728	3.41937	5.53673e-07	0.0113455	-0.000580697
762.57	-49.2498	0.000678893	3.42026	5.3271e-07	0.0112703	-0.000534499
762.993	-49.6879	0.000677069	3.42114	5.12331e-07	0.0111821	-0.00049185
763.417	-50.1259	0.000675255	3.42202	4.92534e-07	0.0110813	-0.000452486
763.84	-50.564	0.000673451	3.42289	4.73316e-07	0.0109684	-0.000416165
764.264	-51.002	0.000671658	3.42376	4.54671e-07	0.0108437	-0.00038266
764.687	-51.4402	0.000669874	3.42463	4.36594e-07	0.010708	-0.000351761
765.111	-51.8786	0.000668101	3.42549	4.19078e-07	0.0105618	-0.000323273
765.534	-52.3171	0.000666337	3.42635	4.02117e-07	0.0104056	-0.000297012
765.958	-52.7559	0.000664584	3.42721	3.85701e-07	0.0102402	-0.000272811
766.381	-53.195	0.00066284	3.42806	3.69822e-07	0.0100663	-0.000250514
766.805	-53.6344	0.000661106	3.42891	3.54471e-07	0.00988437	-0.000229974
767.228	-54.0742	0.000659382	3.42976	3.39637e-07	0.00969523	-0.000211059
767.652	-54.5145	0.000657668	3.4306	3.25311e-07	0.00949953	-0.000193642
768.075	-54.9553	0.000655963	3.43144	3.11482e-07	0.00929796	-0.000177609
768.499	-55.3968	0.000654268	3.43227	2.98139e-07	0.00909118	-0.000162853
768.922	-55.8388	0.000652582	3.43311	2.8527e-07	0.00887984	-0.000149275
769.346	-56.2817	0.000650906	3.43393	2.72864e-07	0.00866461	-0.000136785
769.769	-56.7253	0.000649239	3.43476	2.60911e-07	0.00844609	-0.000125297
770.193	-57.1698	0.000647582	3.43558	2.49398e-07	0.0082249	-0.000114733
770.616	-57.6152	0.000645934	3.4364	2.38313e-07	0.00800161	-0.000105022
771.04	-58.0616	0.000644295	3.43721	2.27645e-07	0.0077768	-9.60967e-05
771.463	-58.5092	0.000642666	3.43802	2.17382e-07	0.00755098	-8.78958e-05
771.887	-58.9579	0.000641045	3.43883	2.07513e-07	0.00732468	-8.03625e-05
772.31	-59.4078	0.000639434	3.43963	1.98026e-07	0.00709836	-7.34443e-05
772.734	-59.8591	0.000637831	3.44043	1.8891e-07	0.00687249	-6.70929e-05
773.157	-60.3118	0.000636238	3.44123	1.80153e-07	0.0066475	-6.12637e-05
773.58	-60.7659	0.000634654	3.44202	1.71745e-07	0.00642377	-5.59153e-05
774.004	-61.2216	0.000633078	3.44281	1.63674e-07	0.00620169	-5.10099e-05
774.427	-61.6788	0.000631511	3.4436	1.55929e-07	0.0059816	-4.65123e-05
774.851	-62.1377	0.000629953	3.44438	1.48501e-07	0.00576383	-4.23902e-05
775.274	-62.5984	0.000628404	3.44516	1.41378e-07	0.00554867	-3.86137e-05
775.698	-63.0608	0.000626863	3.44593	1.3455e-07	0.0053364	-3.51553e-05
776.121	-63.5251	0.000625331	3.44671	1.28008e-07	0.00512728	-3.19897e-05
776.545	-63.9912	0.000623808	3.44748	1.21741e-07	0.00492153	-2.90934e-05
776.968	-64.4592	0.000622293	3.44824	1.15741e-07	0.00471936	-2.64447e-05
777.392	-64.9291	0.000620786	3.44901	1.09998e-07	0.00452096	-2.40239e-05
777.815	-65.4009	0.000619288	3.44977	1.04502e-07	0.00432651	-2.18124e-05
778.239	-65.8747	0.000617798	3.45052	9.92459e-08	0.00413616	-1.97934e-05
778.662	-66.3503	0.000616316	3.45128	9.42202e-08	0.00395004	-1.79513e-05
779.086	-66.8278	0.000614843	3.45203	8.94166e-08	0.00376829	-1.62715e-05
779.509	-67.3071	0.000613378	3.45277	8.48272e-08	0.00359101	-1.47408e-05
779.933	-67.7881	0.000611921	3.45352	8.04441e-08	0.00341829	-1.3347e-05
780.356	-68.2708	0.000610472	3.45426	7.62596e-08	0.00325023	-1.20787e-05
780.78	-68.7549	0.000609031	3.45499	7.22663e-08	0.00308688	-1.09254e-05
781.203	-69.2404	0.000607597	3.45573	6.8457e-08	0.00292831	-9.87766e-06
781.627	-69.7271	0.000606172	3.45646	6.48247e-08	0.00277458	-8.92649e-06
782.05	-70.2146	0.000604755	3.45719	6.13627e-08	0.00262572	-8.06374e-06
782.474	-70.7028	0.000603346	3.45791	5.80645e-08	0.00248177	-7.28186e-06
782.897	-71.1914	0.000601944	3.45863	5.49235e-08	0.00234276	-6.57389e-06
783.321	-71.68	0.00060055	3.45935	5.19338e-08	0.0022087	-5.93343e-06
783.744	-72.1683	0.000599164	3.46007	4.90893e-08	0.00207961	-5.35458e-06
784.168	-72.6557	0.000597785	3.46078	4.63844e-08	0.00195549	-4.8319e-06
784.591	-73.142	0.000596414	3.46149	4.38133e-08	0.00183635	-4.36037e-06
785.015	-73.6264	0.000595051	3.46219	4.13709e-08	0.00172216	-3.93538e-06
785.438	-74.1086	0.000593695	3.4629	3.90518e-08	0.00161293	-3.5527e-06
785.862	-74.5878	0.000592346	3.4636	3.6851e-08	0.00150863	-3.20842e-06
786.285	-75.0635	0.000591005	3.46429	3.47638e-08	0.00140922	-2.89896e-06
786.709	-75.5349	0.000589671	3.46499	3.27855e-08	0.00131467	-2.62102e-06
787.132	-76.0014	0.000588345	3.46568	3.09115e-08	0.00122493	-2.37159e-06
787.556	-76.4621	0.000587026	3.46636	2.91376e-08	0.00113994	-2.1479e-06
787.979	-76.9165	0.000585714	3.46705	2.74596e-08	0.00105962	-1.94742e-06
788.402	-77.3636	0.000584409	3.46773	2.58733e-08	0.000983891	-1.76783e-06
788.826	-77.8027	0.000583111	3.46841	2.4375e-08	0.000912646	-1.60704e-06
789.249	-78.2331	0.000581821	3.46909	2.29609e-08	0.000845773	-1.46311e-06
789.673	-78.654	0.000580537	3.46976	2.16272e-08	0.000783144	-1.3343e-06
790.096	-79.0647	0.00057926	3.47043	2.03705e-08	0.000724617	-1.21904e-06
790.52	-79.4646	0.000577991	3.4711	1.91873e-08	0.00067004	-1.11589e-06
790.943	-79.8529	0.000576728	3.47176	1.80742e-08	0.00061925	-1.02358e-06
791.367	-80.2291	0.000575473	3.47242	1.70279e-08	0.000572075	-9.40939e-07
791.79	-80.5927	0.000574224	3.47308	1.60452e-08	0.000528338	-8.66939e-07
792.214	-80.9433	0.000572982	3.47374	1.5123e-08	0.000487856	-8.00654e-07
792.637	-81.2805	0.000571746	3.47439	1.42582e-08	0.000450446	-7.41259e-07
793.061	-81.604	0.000570518	3.47504	1.34479e-08	0.000415924	-6.88019e-07
793.484	-81.9138	0.000569296	3.47569	1.26891e-08	0.00038411	-6.40281e-07
793.908	-82.2096	0.00056808	3.47633	1.1979e-08	0.000354824	-5.97467e-07
794.331	-82.4914	0.000566872	3.47697	1.13148e-08	0.000327896	-5.59061e-07
794.755	-82.7593	0.00056567	3.47761	1.06939e-08	0.000303158	-5.24608e-07
795.178	-83.0134	0.000564474	3.47825	1.01138e-08	0.00028045	-4.93701e-07
795.602	-83.254	0.000563285	3.47888	9.57207e-09	0.000259621	-4.65978e-07
796.025	-83.4813	0.000562102	3.47951	9.06631e-09	0.000240527	-4.41118e-07
796.449	-83.6956	0.000560926	3.48014	8.59434e-09	0.000223033	-4.18832e-07
796.872	-83.8973	0.000559756	3.48076	8.15409e-09	0.000207011	-3.98862e-07
797.296	-84.0868	0.000558593	3.48138	7.74356e-09	0.000192341	-3.80975e-07
797.719	-84.2645	0.000557436	3.482	7.36092e-09	0.000178914	-3.64963e-07
798.143	-84.431	0.000556285	3.48262	7.00442e-09	0.000166626	-3.50639e-07
798.566	-84.5867	0.00055514	3.48323	6.67244e-09	0.000155383	-3.37831e-07
798.99	-84.7321	0.000554001	3.48384	6.36347e-09	0.000145095	-3.26388e-07
799.413	-84.8678	0.000552869	3.48445	6.0761e-09	0.000135681	-3.16169e-07
799.837	-84.9941	0.000551742	3.48506	5.80902e-09	0.000127067	-3.07052e-07
800.26	-85.1118	0.000550622	3.48566	5.56101e-09	0.000119184	-2.98921e-07
800.684	-85.2212	0.000549508	3.48626	5.33095e-09	0.000111969	-2.91676e-07
801.107	-85.3228	0.0005484	3.48686	5.11779e-09	0.000105365	-2.85224e-07
801.531	-85.4172	0.000547297	3.48746	4.92056e-09	9.93174e-05	-2.79483e-07
801.954	-85.5047	0.000546201	3.48805	4.73836e-09	9.37789e-05	-2.74378e-07
802.378	-85.5859	0.000545111	3.48864	4.57036e-09	8.87051e-05	-2.69842e-07
802.801	-85.6611	0.000544026	3.48923	4.41579e-09	8.40555e-05	-2.65816e-07
803.224	-85.7307	0.000542947	3.48981	4.27392e-09	7.97934e-05	-2.62245e-07
803.648	-85.7953	0.000541874	3.4904	4.14409e-09	7.58849e-05	-2.59081e-07
804.071	-85.855	0.000540807	3.49098	4.02567e-09	7.22994e-05	-2.56281e-07
804.495	-85.9102	0.000539745	3.49155	3.91809e-09	6.90088e-05	-2.53806e-07
804.918	-85.9614	0.000538689	3.49213	3.8208e-09	6.59875e-05	-2.51623e-07
805.342	-86.0087	0.000537639	3.4927	3.7333e-09	6.32122e-05	-2.49699e-07
805.765	-86.0525	0.000536594	3.49327	3.65513e-09	6.06615e-05	-2.48009e-07
806.189	-86.093	0.000535555	3.49384	3.58585e-09	5.83161e-05	-2.46527e-07
806.612	-86.1305	0.000534521	3.4944	3.52504e-09	5.61582e-05	-2.45231e-07
807.036	-86.1652	0.000533493	3.49497	3.47233e-09	5.41717e-05	-2.44103e-07
807.459	-86.1974	0.00053247	3.49553	3.42736e-09	5.23418e-05	-2.43124e-07
807.883	-86.2272	0.000531452	3.49608	3.3898e-09	5.0655e-05	-2.42279e-07
808.306	-86.2548	0.00053044	3.49664	3.35934e-09	4.9099e-05	-2.41555e-07
808.73	-86.2803	0.000529434	3.49719	3.33568e-09	4.76627e-05	-2.40938e-07
809.153	-86.3041	0.000528432	3.49774	3.31856e-09	4.63357e-05	-2.40419e-07
809.577	-86.3261	0.000527436	3.49829	3.30773e-09	4.51087e-05	-2.39986e-07
810	-86.3466	0.000526445	3.49884	3.30295e-09	4.39732e-05	-2.39631e-07
810.424	-86.3656	0.00052546	3.49938	3.304e-09	4.29214e-05	-2.39346e-07
810.847	-86.3833	0.000524479	3.49992	3.31068e-09	4.19462e-05	-2.39124e-07
811.271	-86.3998	0.000523504	3.50046	3.32281e-09	4.1041e-05	-2.38958e-07
811.694	-86.4151	0.000522534	3.50099	3.34021e-09	4.01999e-05	-2.38844e-07
812.118	-86.4295	0.000521568	3.50153	3.36271e-09	3.94175e-05	-2.38774e-07
812.541	-86.4429	0.000520608	3.50206	3.39017e-09	3.86888e-05	-2.38746e-07
812.965	-86.4554	0.000519653	3.50259	3.42246e-09	3.80093e-05	-2.38754e-07
813.388	-86.4671	0.000518703	3.50312	3.45944e-09	3.73747e-05	-2.38796e-07
813.812	-86.4781	0.000517758	3.50364	3.501e-09	3.67814e-05	-2.38867e-07
814.235	-86.4885	0.000516817	3.50416	3.54704e-09	3.62259e-05	-2.38964e-07
814.659	-86.4982	0.000515882	3.50468	3.59746e-09	3.5705e-05	-2.39085e-07
815.082	-86.5073	0.000514951	3.5052	3.65218e-09	3.52157e-05	-2.39227e-07
815.506	-86.5159	0.000514026	3.50572	3.71111e-09	3.47555e-05	-2.39388e-07
815.929	-86.5241	0.000513105	3.50623	3.77419e-09	3.43219e-05	-2.39566e-07
816.353	-86.5318	0.000512188	3.50674	3.84136e-09	3.39127e-05	-2.39759e-07
816.776	-86.5391	0.000511277	3.50725	3.91256e-09	3.35259e-05	-2.39964e-07
817.2	-86.546	0.00051037	3.50776	3.98775e-09	3.31596e-05	-2.40182e-07
817.623	-86.5526	0.000509468	3.50826	4.06689e-09	3.28121e-05	-2.4041e-07
818.046	-86.5589	0.00050857	3.50876	4.14994e-09	3.24819e-05	-2.40647e-07
818.47	-86.5649	0.000507677	3.50926	4.23687e-09	3.21675e-05	-2.40892e-07
818.893	-86.5706	0.000506789	3.50976	4.32767e-09	3.18677e-05	-2.41144e-07
819.317	-86.5761	0.000505905	3.51025	4.42232e-09	3.15812e-05	-2.41401e-07
819.74	-86.5813	0.000505026	3.51075	4.52081e-09	3.1307e-05	-2.41664e-07
820.164	-86.5864	0.000504151	3.51124	4.62313e-09	3.10441e-05	-2.41931e-07
820.587	-86.5912	0.000503281	3.51173	4.72928e-09	3.07915e-05	-2.42202e-07
821.011	-86.5959	0.000502415	3.51221	4.83928e-09	3.05485e-05	-2.42475e-07
821.434	-86.6004	0.000501554	3.5127	4.95312e-09	3.03142e-05	-2.42751e-07
821.858	-86.6048	0.000500697	3.51318	5.07082e-09	3.0088e-05	-2.43029e-07
822.281	-86.609	0.000499844	3.51366	5.1924e-09	2.98693e-05	-2.43308e-07
822.705	-86.6132	0.000498996	3.51414	5.31788e-09	2.96573e-05	-2.43588e-07
823.128	-86.6172	0.000498152	3.51462	5.44729e-09	2.94517e-05	-2.43868e-07
823.552	-86.621	0.000497312	3.51509	5.58065e-09	2.92519e-05	-2.44149e-07
823.975	-86.6248	0.000496476	3.51556	5.71799e-09	2.90575e-05	-2.44429e-07
824.399	-86.6285	0.000495645	3.51603	5.85937e-09	2.8868e-05	-2.44709e-07
824.822	-86.6321	0.000494818	3.5165	6.0048e-09	2.86831e-05	-2.44988e-07
825.246	-86.6357	0.000493995	3.51697	6.15434e-09	2.85024e-05	-2.45266e-07
825.669	-86.6391	0.000493176	3.51743	6.30804e-09	2.83257e-05	-2.45543e-07
826.093	-86.6425	0.000492361	3.51789	6.46593e-09	2.81525e-05	-2.45819e-07
826.516	-86.6458	0.00049155	3.51835	6.62808e-09	2.79828e-05	-2.46093e-07
826.94	-86.6491	0.000490744	3.51881	6.79453e-09	2.78161e-05	-2.46365e-07
827.363	-86.6523	0.000489941	3.51927	6.96534e-09	2.76524e-05	-2.46635e-07
827.787	-86.6554	0.000489143	3.51972	7.14059e-09	2.74913e-05	-2.46904e-07
828.21	-86.6585	0.000488348	3.52017	7.32031e-09	2.73328e-05	-2.4717e-07
828.634	-86.6616	0.000487558	3.52062	7.50459e-09	2.71766e-05	-2.47434e-07
829.057	-86.6646	0.000486771	3.52107	7.69349e-09	2.70226e-05	-2.47696e-07
829.481	-86.6676	0.000485988	3.52152	7.88707e-09	2.68706e-05	-2.47955e-07
829.904	-86.6705	0.000485209	3.52196	8.08542e-09	2.67205e-05	-2.48212e-07
830.328	-86.6734	0.000484434	3.5224	8.28859e-09	2.65723e-05	-2.48467e-07
830.751	-86.6763	0.000483663	3.52284	8.49669e-09	2.64257e-05	-2.48719e-07
831.175	-86.6792	0.000482896	3.52328	8.70977e-09	2.62806e-05	-2.48968e-07
831.598	-86.682	0.000482133	3.52372	8.92792e-09	2.61371e-05	-2.49215e-07
832.021	-86.6848	0.000481373	3.52415	9.15123e-09	2.5995e-05	-2.49459e-07
832.445	-86.6875	0.000480617	3.52459	9.37977e-09	2.58541e-05	-2.497e-07
832.868	-86.6903	0.000479865	3.52502	9.61365e-09	2.57146e-05	-2.49939e-07
833.292	-86.693	0.000479116	3.52545	9.85294e-09	2.55762e-05	-2.50175e-07
833.715	-86.6957	0.000478371	3.52587	1.00977e-08	2.54389e-05	-2.50408e-07
834.139	-86.6983	0.00047763	3.5263	1.03481e-08	2.53027e-05	-2.50638e-07
834.562	-86.701	0.000476892	3.52672	1.06042e-08	2.51675e-05	-2.50866e-07
834.986	-86.7036	0.000476158	3.52714	1.08661e-08	2.50333e-05	-2.51091e-07
835.409	-86.7062	0.000475428	3.52756	1.11339e-08	2.49e-05	-2.51313e-07
835.833	-86.7088	0.000474701	3.52798	1.14076e-08	2.47676e-05	-2.51532e-07
836.256	-86.7114	0.000473978	3.52839	1.16875e-08	2.46361e-05	-2.51749e-07
836.68	-86.7139	0.000473258	3.52881	1.19735e-08	2.45054e-05	-2.51963e-07
837.103	-86.7164	0.000472542	3.52922	1.22659e-08	2.43754e-05	-2.52174e-07
837.527	-86.719	0.00047183	3.52963	1.25647e-08	2.42462e-05	-2.52382e-07
837.95	-86.7215	0.00047112	3.53004	1.287e-08	2.41178e-05	-2.52588e-07
838.374	-86.724	0.000470414	3.53045	1.31819e-08	2.39901e-05	-2.5279e-07
838.797	-86.7264	0.000469712	3.53085	1.35005e-08	2.38631e-05	-2.5299e-07
839.221	-86.7289	0.000469013	3.53125	1.38261e-08	2.37367e-05	-2.53188e-07
839.644	-86.7313	0.000468318	3.53166	1.41586e-08	2.3611e-05	-2.53383e-07
840.068	-86.7338	0.000467625	3.53205	1.44982e-08	2.34859e-05	-2.53575e-07
840.491	-86.7362	0.000466937	3.53245	1.4845e-08	2.33614e-05	-2.53764e-07
840.915	-86.7386	0.000466251	3.53285	1.51991e-08	2.32376e-05	-2.53951e-07
841.338	-86.741	0.000465569	3.53324	1.55607e-08	2.31143e-05	-2.54135e-07
841.762	-86.7434	0.00046489	3.53364	1.59299e-08	2.29916e-05	-2.54317e-07
842.185	-86.7457	0.000464214	3.53403	1.63067e-08	2.28695e-05	-2.54496e-07
842.609	-86.7481	0.000463542	3.53442	1.66914e-08	2.27479e-05	-2.54673e-07
843.032	-86.7504	0.000462873	3.5348	1.70841e-08	2.26269e-05	-2.54847e-07
843.456	-86.7528	0.000462207	3.53519	1.74849e-08	2.25064e-05	-2.55019e-07
843.879	-86.7551	0.000461544	3.53557	1.78939e-08	2.23865e-05	-2.55188e-07
844.303	-86.7574	0.000460884	3.53596	1.83112e-08	2.2267e-05	-2.55354e-07
844.726	-86.7597	0.000460228	3.53634	1.8737e-08	2.21481e-05	-2.55519e-07
845.15	-86.762	0.000459574	3.53672	1.91715e-08	2.20297e-05	-2.5568e-07
845.573	-86.7643	0.000458924	3.53709	1.96147e-08	2.19118e-05	-2.5584e-07
845.997	-86.7665	0.000458277	3.53747	2.00669e-08	2.17943e-05	-2.55997e-07
846.42	-86.7688	0.000457633	3.53784	2.0528e-08	2.16774e-05	-2.56152e-07
846.843	-86.7711	0.000456992	3.53822	2.09984e-08	2.15609e-05	-2.56304e-07
847.267	-86.7733	0.000456354	3.53859	2.14781e-08	2.1445e-05	-2.56454e-07
847.69	-86.7755	0.000455719	3.53896	2.19672e-08	2.13295e-05	-2.56602e-07
848.114	-86.7777	0.000455087	3.53932	2.2466e-08	2.12144e-05	-2.56748e-07
848.537	-86.7799	0.000454458	3.53969	2.29745e-08	2.10998e-05	-2.56891e-07
848.961	-86.7821	0.000453832	3.54005	2.3493e-08	2.09857e-05	-2.57033e-07
[truncated: 5,046 more rows]

## Sheet: A20
1.67895	1.67895	1.67895	1.67895	2.61216	2.63318	2.66612	2.83928
1.49331	1.54149	1.59883	1.76612	0.023193	0.0195283	0.0176742	0.0516521
1.51342	1.58152	1.65081	1.8106	1.55657	1.75445	1.97149	2.5416
1.46222	1.5465	1.62936	1.82585	0.803834	0.928277	1.0577	1.36924
1.48138	1.57792	1.66925	1.8742	0.95247	1.15312	1.34966	1.82476
1.48838	1.59184	1.68911	1.90691	0.929823	1.12679	1.31672	1.7586
1.49865	1.60978	1.71375	1.94358	0.965354	1.18229	1.39214	1.88339
1.50734	1.62567	1.73609	1.97843	0.978497	1.20843	1.42986	1.94126
1.5162	1.64167	1.75856	2.01334	0.997696	1.24252	1.47822	2.02039
1.52471	1.65717	1.78046	2.04778	1.01463	1.27362	1.52274	2.09268
1.53305	1.67239	1.80204	2.08197	1.03175	1.30491	1.56768	2.16681
1.5412	1.68731	1.82326	2.11589	1.04841	1.33555	1.61186	2.24027
1.54918	1.70196	1.84418	2.14956	1.06483	1.36583	1.6557	2.31386
1.55701	1.71636	1.8648	2.18301	1.08099	1.39569	1.69882	2.3874
1.56471	1.73053	1.88514	2.21626	1.09659	1.42519	1.74195	2.46098
1.57228	1.74448	1.9052	2.24932	1.11251	1.45434	1.78449	2.53464
1.57972	1.75822	1.92502	2.2822	1.12795	1.48314	1.82671	2.60843
1.58705	1.77176	1.9446	2.31491	1.14325	1.51163	1.86856	2.68238
1.59428	1.78511	1.96395	2.34747	1.15838	1.53981	1.91009	2.75653
1.60142	1.79828	1.98308	2.37988	1.17333	1.5677	1.95128	2.83095
1.60846	1.81128	2.002	2.41215	1.18812	1.59529	1.99217	2.90565
1.61543	1.82411	2.0207	2.4443	1.20278	1.62261	2.03275	2.9807
1.62231	1.83679	2.03921	2.47633	1.21728	1.64939	2.07304	3.05613
1.62911	1.8493	2.05753	2.50824	1.23164	1.67633	2.11304	3.13201
1.63584	1.86165	2.07566	2.54006	1.24587	1.70279	2.15277	3.20838
1.64249	1.87386	2.0936	2.57178	1.25996	1.72904	2.19222	3.28527
1.64908	1.88593	2.11137	2.60342	1.27393	1.75505	2.23144	3.36268
1.6556	1.89787	2.12896	2.63497	1.28776	1.78082	2.27039	3.44081
1.66205	1.90967	2.14639	2.66646	1.30148	1.80638	2.3091	3.51945
1.66844	1.92134	2.16365	2.69788	1.31508	1.83169	2.3476	3.59881
1.67477	1.93289	2.18076	2.72925	1.32856	1.85673	2.38585	3.67884
1.68103	1.94431	2.1977	2.76056	1.34193	1.88163	2.42389	3.7595
1.68724	1.95561	2.21449	2.79183	1.35518	1.90628	2.46173	3.84081
1.6934	1.9668	2.23114	2.82307	1.36833	1.93072	2.49934	3.92298
1.69949	1.97787	2.24763	2.85427	1.38249	1.95494	2.53679	4.00559
1.70554	1.98883	2.26399	2.88544	1.39474	1.97901	2.57404	4.08907
1.71159	1.99969	2.28021	2.91658	1.40783	2.00282	2.61112	4.17299
1.71759	2.01043	2.29629	2.9477	1.42064	2.02647	2.64801	4.25753
1.72353	2.02107	2.31223	2.9788	1.43337	2.04992	2.68475	4.34271
1.72942	2.03161	2.32805	3.00988	1.446	2.07319	2.72131	4.42842
1.73526	2.04205	2.34373	3.04095	1.45854	2.09626	2.75774	4.51447
1.74105	2.05239	2.3593	3.07199	1.47097	2.11915	2.79401	4.60101
1.74679	2.06264	2.37474	3.10302	1.48331	2.14187	2.83014	4.68804
1.75249	2.07278	2.39005	3.13403	1.49558	2.1644	2.86614	4.77502
1.75814	2.08284	2.40525	3.16502	1.50767	2.18678	2.90198	4.86282
1.76375	2.09281	2.42034	3.19599	1.51973	2.20893	2.93773	4.95062
1.76931	2.10268	2.43531	3.22693	1.53168	2.23105	2.97335	5.03854
1.77482	2.11247	2.45017	3.25784	1.54355	2.25288	3.00884	5.12679
1.7803	2.12217	2.46492	3.28872	1.55531	2.27457	3.04425	5.215
1.78573	2.13178	2.47956	3.31957	1.56701	2.29613	3.07955	5.30322
1.79111	2.14131	2.49409	3.35037	1.5786	2.3175	3.11472	5.39166
1.79646	2.15076	2.50852	3.38113	1.59011	2.33874	3.14977	5.47981
1.80177	2.16013	2.52285	3.41183	1.60153	2.35983	3.18481	5.56826
1.80703	2.16941	2.53707	3.44248	1.61287	2.38076	3.21966	5.65609
1.81226	2.17862	2.5512	3.47307	1.62412	2.40155	3.25626	5.74446
1.81744	2.18775	2.56525	3.5036	1.63528	2.42216	3.29002	5.83191
1.82259	2.1968	2.57921	3.53405	1.64639	2.44265	3.325	5.91961
1.8277	2.20578	2.59307	3.56442	1.65739	2.46298	3.35951	6.00708
1.83277	2.21468	2.60684	3.59471	1.66732	2.48326	3.39413	6.09391
1.8378	2.2235	2.62051	3.6249	1.67975	2.5033	3.42853	6.18077
1.84275	2.23226	2.63409	3.655	1.68973	2.52327	3.46288	6.26697
1.84773	2.24094	2.64759	3.68497	1.70058	2.54307	3.4972	6.35295
1.85265	2.24956	2.66099	3.71482	1.71017	2.56276	3.5314	6.4383
1.85754	2.2581	2.6743	3.74459	1.72131	2.58232	3.56547	6.52348
1.86235	2.26658	2.68752	3.77421	1.73157	2.60175	3.59953	6.60852
1.86713	2.27498	2.70066	3.8037	1.7419	2.62105	3.63345	6.69173
1.87188	2.28333	2.71371	3.83308	1.75214	2.64025	3.66727	6.77653
1.8766	2.2916	2.72668	3.86228	1.76232	2.65931	3.70105	6.85815
1.88128	2.29981	2.73956	3.89134	1.77242	2.67826	3.73471	6.94188
1.88593	2.30796	2.75237	3.92025	1.78246	2.69709	3.76829	7.02247
1.89055	2.31604	2.76508	3.94901	1.79243	2.71581	3.80177	7.10456
1.89514	2.32406	2.77772	3.97763	1.80234	2.73443	3.83507	7.18552
1.8997	2.33202	2.79027	4.00607	1.81219	2.75293	3.86842	7.26485
1.90423	2.33992	2.80275	4.03434	1.82196	2.77132	3.90156	7.34502
1.90873	2.34776	2.81514	4.06243	1.83169	2.7896	3.9346	7.42292
1.91321	2.35555	2.82745	4.09035	1.84135	2.80778	3.96758	7.5021
1.91765	2.36327	2.83969	4.1181	1.85095	2.82587	4.00038	7.57849
1.92206	2.37094	2.85185	4.14566	1.86048	2.84384	4.03318	7.65649
1.92645	2.37855	2.86393	4.17304	1.86998	2.86173	4.06574	7.73131
1.93081	2.3861	2.87593	4.20023	1.87943	2.87952	4.09822	7.80792
1.93514	2.39361	2.88786	4.22724	1.88874	2.89723	4.13066	7.88172
1.93944	2.40105	2.8997	4.25405	1.89809	2.9148	4.16282	7.95639
1.94372	2.40845	2.91148	4.28068	1.90734	2.93233	4.19502	8.02927
1.94798	2.41579	2.92317	4.30714	1.91655	2.94974	4.22695	8.10268
1.9522	2.42309	2.93479	4.3334	1.9257	2.96708	4.25881	8.1739
1.95641	2.43033	2.94634	4.35946	1.9348	2.98433	4.29056	8.24577
1.96058	2.43752	2.95781	4.38532	1.94386	3.0015	4.3221	8.31587
1.96474	2.44466	2.96921	4.41098	1.95286	3.01855	4.3536	8.38622
1.96887	2.45176	2.98054	4.43645	1.96181	3.0356	4.38485	8.45492
1.97297	2.4588	2.99179	4.46171	1.97072	3.05249	4.41608	8.52385
1.97705	2.46581	3.00297	4.48678	1.97958	3.06934	4.44699	8.59103
1.98111	2.47276	3.01407	4.51164	1.98839	3.08609	4.47799	8.65868
1.98515	2.47967	3.0251	4.53631	1.99716	3.10277	4.50857	8.72388
1.98917	2.48654	3.03607	4.56077	2.00588	3.11939	4.53925	8.79099
1.99316	2.49336	3.04696	4.58503	2.01456	3.13598	4.5696	8.85356
1.99713	2.50013	3.05777	4.60909	2.0232	3.15237	4.59988	8.92043
2.00108	2.50687	3.06852	4.63294	2.03179	3.16883	4.62995	8.9813
2.00501	2.51357	3.0792	4.65661	2.04034	3.18509	4.65995	9.04594
2.00892	2.52022	3.0898	4.68006	2.04886	3.20139	4.68968	9.10601
2.01282	2.52683	3.10034	4.70332	2.05733	3.21587	4.71937	9.16885
2.01669	2.53339	3.1108	4.72638	2.06577	3.23299	4.74877	9.21352
2.02054	2.53989	3.1212	4.74927	2.07416	3.24866	4.77815	9.29409
2.02437	2.54636	3.13153	4.77189	2.08252	3.2647	4.8072	9.33281
2.02819	2.5528	3.14179	4.79439	2.09084	3.28059	4.8363	9.41001
2.03198	2.5592	3.15198	4.81661	2.09913	3.2964	4.86499	9.44987
2.03576	2.56556	3.1621	4.83872	2.10738	3.31211	4.89373	9.52164
2.03952	2.57188	3.17216	4.86056	2.11559	3.3278	4.9222	9.56387
2.04326	2.57817	3.18215	4.88227	2.12378	3.34346	4.94592	9.62995
2.04699	2.58443	3.19205	4.90374	2.13192	3.35907	4.97945	9.67449
2.0507	2.59065	3.20189	4.92507	2.14004	3.37455	5.00311	9.73503
2.05439	2.59683	3.21167	4.94616	2.14813	3.39004	5.03433	9.78103
2.05806	2.60298	3.22138	4.9671	2.15618	3.40549	5.05915	9.83694
2.06173	2.6091	3.23103	4.98783	2.1642	3.42078	5.08895	9.88375
2.06537	2.61519	3.24061	5.00841	2.17219	3.43612	5.11423	9.93483
2.069	2.62124	3.25013	5.0288	2.18015	3.4514	5.14305	9.98152
2.07261	2.62726	3.25958	5.04903	2.18808	3.46661	5.16853	10.0284
2.07621	2.63326	3.26897	5.06908	2.19599	3.48179	5.19654	10.0736
2.0798	2.63922	3.2783	5.08897	2.20386	3.49687	5.22223	10.117
2.08337	2.64514	3.28757	5.10871	2.21171	3.51195	5.24944	10.1585
2.08692	2.65104	3.29677	5.12829	2.21953	3.52694	5.27509	10.198
2.09046	2.65692	3.30592	5.14773	2.22732	3.54195	5.30179	10.2347
2.09399	2.66276	3.315	5.16703	2.2351	3.55692	5.32726	10.2683
2.09751	2.66857	3.32402	5.18621	2.24284	3.57175	5.35353	10.298
2.10101	2.67436	3.33298	5.20528	2.25056	3.58644	5.37875	10.3233
2.1045	2.68011	3.34188	5.22426	2.25825	3.60136	5.40459	10.3432
2.10797	2.68584	3.35072	5.24316	2.26592	3.61598	5.42959	10.3583
2.11143	2.69154	3.3595	5.262	2.27357	3.63058	5.45504	10.3702
2.11488	2.69721	3.36822	5.28079	2.28119	3.64549	5.47975	10.3831
2.11832	2.70286	3.37689	5.29953	2.28879	3.65988	5.50487	10.3996
2.12175	2.70849	3.38549	5.31823	2.29637	3.67457	5.5293	10.4192
2.12516	2.71408	3.39404	5.33682	2.30392	3.68891	5.5541	10.4414
2.12857	2.71965	3.40253	5.35533	2.31146	3.7036	5.57813	10.4649
2.13196	2.7252	3.41097	5.37373	2.31898	3.71782	5.6027	10.4898
2.13534	2.73072	3.41935	5.39201	2.32647	3.73242	5.62642	10.5149
2.13871	2.73621	3.42767	5.41016	2.33394	3.7466	5.65062	10.5407
2.14206	2.74168	3.43594	5.4282	2.3414	3.76095	5.67409	10.5667
2.14541	2.74713	3.44416	5.44614	2.34883	3.77525	5.69799	10.5949
2.14875	2.75255	3.45232	5.464	2.35624	3.78945	5.72107	10.6215
2.15207	2.75795	3.46042	5.48177	2.36364	3.80365	5.74479	10.6474
2.15539	2.76332	3.46847	5.49935	2.37102	3.81777	5.76744	10.6737
2.15869	2.76868	3.47647	5.51679	2.37837	3.83184	5.79098	10.7002
2.16199	2.77401	3.48442	5.53408	2.38572	3.84598	5.81322	10.7279
2.16527	2.77931	3.49231	5.55128	2.39304	3.85991	5.83659	10.7541
2.16855	2.7846	3.50015	5.56834	2.40035	3.87389	5.85835	10.7794
2.17182	2.78986	3.50795	5.58521	2.40763	3.88769	5.88165	10.8065
2.17507	2.7951	3.51568	5.60196	2.41491	3.90194	5.90294	10.8315
2.17832	2.80032	3.52338	5.61857	2.42217	3.91563	5.9261	10.8606
2.18156	2.80551	3.53101	5.63514	2.42941	3.92947	5.94689	10.8849
2.18479	2.81069	3.5386	5.65157	2.43663	3.94322	5.97009	10.9111
2.18801	2.81584	3.54614	5.66782	2.44384	3.95691	5.99019	10.9373
2.19122	2.82098	3.55363	5.68396	2.45104	3.97088	6.01358	10.9642
2.19442	2.82609	3.56107	5.70004	2.45822	3.98433	6.0328	10.9887
2.19761	2.83118	3.56847	5.71588	2.46538	3.99809	6.05675	11.0136
2.2008	2.83625	3.57581	5.73156	2.47253	4.0117	6.07461	11.0402
2.20398	2.8413	3.58312	5.7472	2.47967	4.02516	6.0996	11.0643
2.20714	2.84633	3.59036	5.76264	2.48679	4.03875	6.11563	11.0903
2.2103	2.85134	3.59758	5.778	2.49389	4.05259	6.14225	11.1144
2.21346	2.85634	3.60472	5.79316	2.50099	4.06551	6.15558	11.1392
2.2166	2.86131	3.61186	5.80818	2.50807	4.07913	6.18508	11.1638
2.21974	2.86626	3.6189	5.82308	2.51514	4.09247	6.19422	11.1885
2.22286	2.87119	3.62596	5.83787	2.52219	4.10581	6.22838	11.2118
2.22598	2.87611	3.63289	5.85249	2.52923	4.11913	6.2309	11.2373
2.2291	2.881	3.63988	5.86706	2.53626	4.13238	6.27306	11.2605
2.2322	2.88588	3.6467	5.88145	2.54328	4.14558	6.26469	11.2839
2.2353	2.89074	3.65364	5.89569	2.55028	4.15883	6.32027	11.3076
2.23839	2.89557	3.66032	5.90982	2.55727	4.17186	6.29397	11.3319
2.24147	2.90039	3.66724	5.92388	2.56426	4.18518	6.37235	11.3542
2.24455	2.90519	3.67375	5.93775	2.57122	4.19808	6.31563	11.3779
2.24762	2.90998	3.6807	5.95153	2.57818	4.21169	6.43374	11.402
2.25068	2.91474	3.68697	5.96527	2.58512	4.22376	6.32355	11.4233
2.25373	2.91949	3.69403	5.97877	2.59206	4.23749	6.51197	11.4468
2.25678	2.92422	3.69994	5.99222	2.59898	4.25034	6.30816	11.4688
2.25982	2.92893	3.70726	6.00548	2.60589	4.26272	6.62021	11.4918
2.26285	2.93363	3.7126	6.01867	2.61279	4.27602	6.25179	11.5126
2.26588	2.9383	3.72042	6.03164	2.61968	4.28863	6.78162	11.5351
2.26889	2.94296	3.72478	6.04453	2.62656	4.30149	6.12454	11.5571
2.27191	2.9476	3.7335	6.05731	2.63343	4.3142	7.03331	11.5795
2.27491	2.95222	3.73617	6.07002	2.64029	4.32694	5.88547	11.5994
2.27791	2.95683	3.74618	6.08252	2.64713	4.33958	7.41195	11.6212
2.2809	2.96142	3.74621	6.09493	2.65398	4.35229	5.52036	11.6425
2.28389	2.96599	3.75742	6.10724	2.6608	4.36481	7.87693	11.6636
2.28687	2.97055	3.75456	6.11945	2.66762	4.37747	5.13412	11.6853
2.28984	2.97508	3.76607	6.1316	2.67442	4.38993	8.23328	11.7045
2.29281	2.97961	3.7622	6.14355	2.68123	4.40244	4.90075	11.7255
2.29577	2.98411	3.77389	6.15541	2.68802	4.41487	8.39192	11.7465
2.29872	2.9886	3.77041	6.16721	2.69479	4.42734	4.82511	11.7657
2.30167	2.99307	3.7824	6.17883	2.70157	4.43973	8.46527	11.7862
2.30461	2.99753	3.77902	6.19036	2.70832	4.45199	4.80923	11.8071
2.30755	3.00197	3.79122	6.20183	2.71507	4.46438	8.5182	11.8253
2.31047	3.00639	3.78769	6.21313	2.72183	4.47666	4.80707	11.8456
2.3134	3.01079	3.80003	6.22435	2.72855	4.4888	8.56702	11.8663
2.31631	3.01519	3.79628	6.23551	2.73527	4.5012	4.80726	11.8838
2.31922	3.01956	3.80876	6.24651	2.742	4.51269	8.61361	11.9038
2.32213	3.02392	3.80481	6.25742	2.7487	4.5259	4.80879	11.924
2.32503	3.02826	3.81742	6.2683	2.75539	4.53712	8.6594	11.9426
2.32792	3.03259	3.81324	6.27907	2.76208	4.54972	4.81042	11.9616
2.33081	3.0369	3.82598	6.28974	2.76877	4.56132	8.70316	11.9801
2.33369	3.04119	3.8216	6.30033	2.77542	4.57361	4.81331	11.999
2.33656	3.04547	3.83447	6.31081	2.78211	4.58539	8.74571	12.0151
2.33943	3.04974	3.82988	6.32109	2.78874	4.59743	4.81637	12.0336
2.34229	3.05399	3.84287	6.33126	2.79539	4.60878	8.78766	12.0519
2.34515	3.05822	3.83808	6.34134	2.80205	4.62157	4.82016	12.0698
2.348	3.06243	3.85121	6.35136	2.80866	4.63242	8.82816	12.0871
2.35085	3.06664	3.84621	6.36127	2.81528	4.64478	4.82439	12.105
2.35369	3.07083	3.85947	6.37112	2.8219	4.65607	8.86795	12.1227
2.35652	3.075	3.85426	6.38089	2.82851	4.66816	4.82881	12.1404
2.35935	3.07915	3.86765	6.3906	2.83508	4.67999	8.90682	12.1571
2.36217	3.0833	3.86225	6.40021	2.8417	4.69075	4.83359	12.1749
2.36499	3.08743	3.87576	6.40974	2.84828	4.70323	8.94478	12.1903
2.3678	3.09154	3.87016	6.41909	2.85482	4.71407	4.83858	12.2064
2.37061	3.09564	3.8838	6.42833	2.86142	4.72612	8.98191	12.2232
2.37341	3.09972	3.87801	6.43749	2.86795	4.73718	4.84422	12.2397
2.3762	3.10379	3.89178	6.44654	2.87451	4.74895	9.01804	12.2569
2.37899	3.10784	3.88579	6.45554	2.88104	4.76004	4.85011	12.2718
2.38178	3.11188	3.89969	6.46448	2.88759	4.77163	9.05159	12.2883
2.38455	3.1159	3.89353	6.47335	2.89412	4.78284	4.85751	12.3044
2.38733	3.11991	3.90754	6.48216	2.90061	4.79424	9.0879	12.3204
2.39009	3.12391	3.90118	6.49091	2.90715	4.80536	4.86299	12.3371
2.39285	3.12789	3.91533	6.49959	2.91363	4.81667	9.12156	12.3503
2.39561	3.13186	3.90878	6.50809	2.92013	4.82784	4.87002	12.3636
2.39836	3.13581	3.92306	6.51637	2.92662	4.839	9.15436	12.3788
2.4011	3.13974	3.91634	6.52456	2.93308	4.8501	4.87737	12.3935
2.40384	3.14367	3.93074	6.53269	2.93958	4.86113	9.18642	12.4081
2.40657	3.14758	3.92384	6.54074	2.94601	4.87231	4.8851	12.4226
2.4093	3.15147	3.93837	6.54872	2.9525	4.88309	9.21762	12.437
2.41203	3.15535	3.9313	6.55663	2.95892	4.89427	4.89326	12.4512
2.41474	3.15922	3.94595	6.56447	2.96536	4.90508	9.24796	12.4654
2.41745	3.16307	3.9387	6.57224	2.97181	4.916	4.90186	12.4794
2.42016	3.16691	3.95348	6.57994	2.97821	4.92691	9.27746	12.4935
2.42286	3.17074	3.94607	6.58755	2.98465	4.93769	4.91094	12.5076
2.42556	3.17455	3.96097	6.5951	2.99104	4.9485	9.30614	12.5207
2.42825	3.17835	3.9534	6.60258	2.99745	4.95923	4.92044	12.5339
2.43093	3.18213	3.96842	6.60998	3.00384	4.97	9.33426	12.5475
2.43361	3.1859	3.96069	6.61732	3.01024	4.98063	4.93032	12.561
2.43628	3.18966	3.97584	6.62464	3.01659	4.99132	9.36123	12.5743
2.43895	3.1934	3.96796	6.63191	3.02299	5.00189	4.94084	12.5869
2.44161	3.19713	3.98323	6.63904	3.02933	5.0125	9.38732	12.6009
2.44427	3.20085	3.97519	6.64617	3.03569	5.02286	4.95193	12.6132
2.44692	3.20456	3.99058	6.65323	3.04203	5.0338	9.41252	12.6255
2.44956	3.20824	3.9824	6.66018	3.04839	5.04379	4.96361	12.6392
2.4522	3.21192	3.99791	6.66711	3.0547	5.05465	9.43683	12.6508
2.45484	3.21558	3.98958	6.67397	3.06105	5.06471	4.97588	12.6646
2.45747	3.21923	4.00521	6.68101	3.06734	5.07537	9.46016	12.6771
2.46009	3.22287	3.99674	6.68804	3.07366	5.0854	4.98881	12.691
2.46271	3.22649	4.01249	6.69502	3.07993	5.09603	9.48256	12.7023
2.46533	3.2301	4.00388	6.70192	3.08627	5.10598	5.00242	12.7151
2.46793	3.2337	4.01976	6.70875	3.09251	5.11653	9.504	12.7274
2.47053	3.23728	4.01101	6.71553	3.09881	5.12636	5.0167	12.7397
2.47313	3.24086	4.02701	6.72226	3.10507	5.13694	9.52444	12.7516
2.47572	3.24441	4.01813	6.72872	3.11135	5.14656	5.03181	12.7649
2.47831	3.24796	4.03424	6.73511	3.11757	5.15725	9.54386	12.7749
2.48089	3.25149	4.02524	6.7414	3.12384	5.16664	5.04768	12.7865
2.48346	3.25502	4.04147	6.74766	3.13006	5.17733	9.56229	12.7983
2.48603	3.25852	4.03235	6.75384	3.13628	5.18673	5.06435	12.8089
2.4886	3.26202	4.0487	6.75998	3.14252	5.19721	9.58013	12.8201
2.49115	3.2655	4.03946	6.76598	3.14873	5.20665	5.08158	12.8314
2.49371	3.26897	4.05593	6.77204	3.15492	5.21696	9.59602	12.8436
2.49625	3.27242	4.04657	6.77807	3.1611	5.22644	5.10047	12.8528
2.4988	3.27587	4.06317	6.78401	3.16732	5.2366	9.61125	12.8648
2.50133	3.2793	4.0537	6.78992	3.17348	5.24608	5.11999	12.8753
2.50386	3.28272	4.07041	6.79596	3.17966	5.25612	9.62545	12.8874
2.50639	3.28612	4.06083	6.80195	3.18583	5.26551	5.14046	12.897
2.50891	3.28952	4.07767	6.80791	3.19196	5.27555	9.63859	12.9082
2.51142	3.2929	4.06798	6.81386	3.19811	5.28445	5.16201	12.9189
2.51393	3.29627	4.08495	6.81977	3.20428	5.29543	9.65068	12.9296
2.51643	3.29962	4.07515	6.82557	3.21038	5.30339	5.1846	12.9403
2.51893	3.30298	4.09225	6.83138	3.2165	5.31469	9.66173	12.9509
2.52142	3.3063	4.08234	6.83716	3.22262	5.32231	5.20829	12.9614
2.52391	3.30963	4.09957	6.8429	3.22872	5.33387	9.67178	12.9732
2.52639	3.31293	4.08956	6.8486	3.23483	5.34097	5.23311	12.9819
2.52886	3.31624	4.10692	6.85422	3.24086	5.35303	9.68085	12.9938
2.53133	3.31951	4.0968	6.85979	3.24701	5.35948	5.25905	13.0023
2.53379	3.3228	4.11431	6.8653	3.25301	5.37209	9.68892	13.0136
2.53625	3.32604	4.10408	6.87077	3.25908	5.37786	5.2862	13.0225
2.5387	3.32931	4.12173	6.87621	3.26517	5.39103	9.69624	13.0326
2.54115	3.33252	4.11139	6.88162	3.27117	5.39584	5.31436	13.0424
2.54359	3.33577	4.12919	6.88693	3.27718	5.41027	9.70269	13.0496
2.54603	3.33895	4.11874	6.89214	3.28327	5.41334	5.34368	13.0594
2.54846	3.3422	4.13668	6.89734	3.28924	5.42968	9.70838	13.0734
2.55088	3.34534	4.12612	6.90264	3.29523	5.43037	5.37411	13.0817
2.5533	3.34857	4.14422	6.90785	3.30127	5.44934	9.7134	13.0899
2.55572	3.35168	4.13355	6.913	3.30725	5.44688	5.40561	13.0999
2.55812	3.3549	4.1518	6.9181	3.31321	5.46932	9.71782	13.1091
2.56053	3.35796	4.141	6.9232	3.31919	5.46261	5.43811	13.1183
2.56292	3.36119	4.15941	6.92824	3.32512	5.4901	9.72171	13.1288
2.56531	3.36419	4.1485	6.93326	3.33113	5.47705	5.47159	13.1362
2.5677	3.36744	4.16706	6.93814	3.33699	5.51195	9.72515	13.1456
2.57008	3.37037	4.15603	6.94307	3.34301	5.49004	5.50599	13.155
2.57245	3.37366	4.17475	6.94794	3.34883	5.53561	9.7282	13.161
2.57482	3.37649	4.16359	6.95278	3.35484	5.50038	5.54127	13.1725
2.57718	3.37984	4.18248	6.95761	3.36065	5.56205	9.73092	13.1711
2.57954	3.38255	4.17119	6.9622	3.36662	5.50704	5.5774	13.1914
2.58189	3.38601	4.19023	6.96708	3.37247	5.59287	9.7334	13.1974
2.58423	3.38853	4.17881	6.97181	3.37833	5.50804	5.61423	13.2067
2.58657	3.39216	4.19801	6.97648	3.38423	5.63048	9.73566	13.2157
2.5889	3.3944	4.18646	6.9811	3.39	5.50024	5.65189	13.2226
2.59123	3.39832	4.20581	6.98564	3.39591	5.67882	9.73773	13.232
2.59355	3.40016	4.19413	6.9902	3.40173	5.47897	5.69013	13.2392
2.59587	3.40452	4.21363	6.9947	3.40755	5.74444	9.73968	13.247
2.59818	3.40573	4.20182	6.99915	3.41338	5.43614	5.72893	13.2563
2.60048	3.41078	4.22146	7.00363	3.41914	5.83579	9.74151	13.2641
2.60278	3.41102	4.20952	7.00804	3.42498	5.36193	5.76832	13.2724
2.60507	3.41713	4.2293	7.01236	3.43072	5.96673	9.74324	13.2761
2.60736	3.41589	4.21724	7.01663	3.4365	5.2414	5.8082	13.2888
2.60964	3.42355	4.23714	7.02097	3.44225	6.15272	9.74491	13.2966
2.61191	3.42012	4.22496	7.02528	3.44798	5.06264	5.84846	13.3044
2.61419	3.42987	4.24497	7.02952	3.45376	6.39991	9.74651	13.3118
2.61645	3.42347	4.23268	7.03373	3.45949	4.83355	5.88928	13.3194
2.61871	3.43563	4.2528	7.03791	3.46519	6.67645	9.74805	13.3272
2.62096	3.42603	4.2404	7.04206	3.47093	4.6154	5.93045	13.3346
2.6232	3.44054	4.26062	7.04616	3.47655	6.88965	9.74956	13.3418
2.62544	3.42874	4.24811	7.05025	3.48233	4.46081	5.97197	13.3493
2.62768	3.44478	4.26842	7.0543	3.48795	7.02467	9.75101	13.3552
2.62991	3.43184	4.25582	7.0583	3.49363	4.3763	6.01376	13.3627
2.63213	3.44885	4.2762	7.0623	3.49931	7.0985	9.75242	13.3698
2.63434	3.43539	4.2635	7.06628	3.50488	4.33916	6.05581	13.377
2.63656	3.45295	4.28395	7.07022	3.5106	7.1431	9.75379	13.3843
2.63876	3.43918	4.27116	7.07407	3.51616	4.32307	6.09793	13.3912
2.64096	3.45706	4.29166	7.07787	3.52177	7.17685	9.75512	13.3979
2.64315	3.44304	4.2788	7.0816	3.52742	4.31452	6.14038	13.4046
2.64534	3.46116	4.29934	7.0853	3.53298	7.20683	9.75639	13.4113
2.64752	3.44691	4.28641	7.08903	3.53854	4.30846	6.18276	13.4194
2.6497	3.46524	4.30698	7.09275	3.54412	7.23545	9.75762	13.4255
2.65187	3.45078	4.29398	7.09643	3.54965	4.30369	6.22556	13.4308
2.65403	3.46932	4.31457	7.10006	3.55525	7.26298	9.7588	13.4375
2.65619	3.45464	4.30152	7.10369	3.56073	4.29938	6.26826	13.444
2.65834	3.47336	4.32211	7.1073	3.56631	7.29014	9.75993	13.4497
2.66049	3.45847	4.30902	7.11089	3.57177	4.29531	6.31108	13.4532
2.66263	3.47739	4.3296	7.11441	3.5773	7.31782	9.76104	13.4635
2.66476	3.46228	4.31648	7.11798	3.58276	4.2907	6.35383	13.4692
2.66689	3.4814	4.33704	7.12154	3.58821	7.34372	9.76209	13.4758
2.66901	3.46608	4.32389	7.12509	3.59374	4.28751	6.39656	13.4816
2.67113	3.48538	4.34442	7.12853	3.59916	7.36963	9.76308	13.4889
2.67324	3.46986	4.33125	7.13201	3.60461	4.28411	6.43927	13.4927
2.67534	3.48934	4.35174	7.13546	3.61	7.3954	9.76405	13.4949
2.67744	3.47362	4.33856	7.13878	3.61549	4.2807	6.48182	13.507
2.67953	3.49327	4.359	7.1423	3.62079	7.421	9.76499	13.5118
2.68162	3.47735	4.34582	7.14572	3.62627	4.27744	6.52426	13.5183
2.6837	3.49719	4.36619	7.14909	3.63162	7.4462	9.76588	13.5237
2.68578	3.48106	4.35302	7.15235	3.63699	4.27434	6.56653	13.5299
2.68785	3.50107	4.37332	7.15565	3.64237	7.4712	9.76676	13.5357
2.68991	3.48475	4.36016	7.15894	3.64768	4.27131	6.60861	13.5423
2.69197	3.50494	4.38038	7.16222	3.65306	7.49603	9.7676	13.5467
2.69402	3.48841	4.36724	7.16542	3.65833	4.26831	6.65047	13.5522
2.69606	3.50878	4.38738	7.1686	3.66365	7.52046	9.76839	13.5583
2.6981	3.49206	4.37426	7.17182	3.66897	4.26557	6.6921	13.566
2.70013	3.5126	4.3943	7.17509	3.67421	7.54466	9.76917	13.5712
2.70216	3.49568	4.38122	7.17831	3.6795	4.26284	6.7335	13.5754
2.70418	3.5164	4.40116	7.18143	3.68481	7.56871	9.76994	13.5811
2.7062	3.49928	4.38812	7.18454	3.68996	4.26016	6.77455	13.5864
2.70821	3.52017	4.40794	7.18768	3.69531	7.59248	9.77013	13.5922
2.71021	3.50286	4.39495	7.19081	3.70042	4.25761	6.81644	13.5972
2.71221	3.52392	4.41465	7.1939	3.70568	7.61603	9.77139	13.6025
2.7142	3.50641	4.40171	7.19697	3.71091	4.25515	6.85525	13.608
2.71618	3.52765	4.42129	7.20003	3.71603	7.63937	9.77208	13.6133
2.71816	3.50994	4.4084	7.20306	3.72125	4.25273	6.89633	13.6185
2.72014	3.53135	4.42785	7.20606	3.72641	7.66244	9.77275	13.6236
2.7221	3.51346	4.41503	7.20903	3.73154	4.25045	6.93577	13.6287
2.72406	3.53503	4.43435	7.21194	3.73664	7.68532	9.77341	13.6338
2.72602	3.51694	4.42159	7.21482	3.74183	4.24819	6.97541	13.6398
2.72797	3.53868	4.44077	7.21771	3.7469	7.70797	9.77407	13.6448
2.72991	3.52041	4.42808	7.22067	3.752	4.246	7.01425	13.65
2.73185	3.54231	4.44711	7.22357	3.7571	7.73048	9.77471	13.6546
2.73378	3.52385	4.4345	7.22644	3.76214	4.24388	7.0531	13.6593
2.73571	3.54592	4.45338	7.22929	3.76724	7.75266	9.77533	13.6642
2.73763	3.52728	4.44085	7.23215	3.77225	4.24191	7.09168	13.6689
2.73954	3.54951	4.45958	7.235	3.77728	7.77474	9.77596	13.6734
2.74145	3.53067	4.44712	7.23781	3.78233	4.23988	7.12914	13.6787
2.74335	3.55307	4.4657	7.24062	3.7873	7.79653	9.77656	13.6848
2.74525	3.53405	4.45333	7.24341	3.79236	4.238	7.16688	13.6891
2.74714	3.55661	4.47174	7.24616	3.79723	7.81818	9.77715	13.6928
2.74902	3.53741	4.45946	7.24884	3.80231	4.23616	7.20372	13.6975
2.7509	3.56013	4.47772	7.25151	3.80716	7.83956	9.77772	13.702
2.75277	3.54074	4.46553	7.25413	3.81219	4.23437	7.24046	13.7076
2.75464	3.56362	4.48362	7.2568	3.81707	7.8608	9.77829	13.7108
2.7565	3.54406	4.47152	7.25942	3.82204	4.23264	7.27662	13.7169
2.75835	3.56709	4.48945	7.26207	3.82686	7.88185	9.77884	13.7197
2.7602	3.54734	4.47745	7.26461	3.83181	4.23094	7.31251	13.7259
2.76204	3.57054	4.49521	7.26722	3.83662	7.90271	9.77938	13.7294
2.76388	3.55061	4.4833	7.26985	3.84157	4.2293	7.34784	13.7354
2.76571	3.57397	4.5009	7.27251	3.84634	7.92334	9.77991	13.7382
2.76754	3.55386	4.48909	7.27513	3.85123	4.22776	7.38289	13.7431
2.76936	3.57737	4.50651	7.27776	3.85605	7.94378	9.78041	13.7473
2.77117	3.55708	4.49481	7.28035	3.86081	4.22621	7.41747	13.7519
2.77298	3.58075	4.51206	7.28291	3.86563	7.96369	9.78089	13.7563
2.77478	3.5603	4.50046	7.28543	3.87043	4.22507	7.45164	13.7603
2.77657	3.58412	4.51754	7.28791	3.87519	7.9841	9.78135	13.7659
2.77836	3.56348	4.50604	7.29043	3.87993	4.2234	7.48549	13.7685
2.78015	3.58746	4.52295	7.29291	3.88467	8.00352	9.78179	13.7742
2.78193	3.56665	4.51156	7.29539	3.88943	4.22242	7.51864	13.7767
2.7837	3.59078	4.52829	7.29782	3.89409	8.02317	9.78222	13.7823
2.78547	3.5698	4.51701	7.30027	3.89887	4.22114	7.55176	13.7849
2.78723	3.59407	4.53357	7.30262	3.90354	8.04278	9.78261	13.79
2.78898	3.57292	4.52239	7.30503	3.90815	4.21982	7.58425	13.7936
2.79073	3.59735	4.53877	7.30741	3.91289	8.06214	9.78275	13.7971
2.79247	3.57602	4.52772	7.30972	3.9175	4.21855	7.61707	13.8011
2.79421	3.6006	4.54392	7.31207	3.92212	8.08134	9.78307	13.806
2.79594	3.5791	4.53298	7.31444	3.92677	4.21736	7.64859	13.8088
2.79767	3.60383	4.54901	7.31677	3.93139	8.10037	9.78338	13.8129
2.79938	3.58216	4.53818	7.3191	3.93595	4.21618	7.68035	13.8167
2.8011	3.60704	4.55404	7.32144	3.94051	8.1192	9.78365	13.8206
2.80281	3.5852	4.54332	7.3237	3.94515	4.21507	7.71138	13.8244
2.80451	3.61022	4.559	7.32593	3.94966	8.13785	9.78389	13.8282
2.80621	3.58821	4.54839	7.32819	3.95422	4.214	7.74228	13.8334
2.8079	3.61338	4.5639	7.33048	3.95873	8.1563	9.78409	13.8368
2.80958	3.59121	4.55341	7.33273	3.96325	4.213	7.77274	13.8402
2.81126	3.61653	4.56874	7.33493	3.96773	8.17476	9.78424	13.8438
2.81293	3.59418	4.55837	7.33716	3.97223	4.21188	7.80289	13.8477
2.8146	3.61965	4.57352	7.33942	3.97674	8.19282	9.78437	13.851
2.81626	3.59714	4.56326	7.3416	3.98112	4.21099	7.83262	13.8549
2.81792	3.62274	4.57824	7.34379	3.98566	8.21077	9.78446	13.8583
2.81957	3.60007	4.5681	7.34594	3.99002	4.21009	7.86209	13.8619
2.82122	3.62582	4.58291	7.34805	3.99446	8.22857	9.78449	13.8654
2.82286	3.60299	4.57288	7.3502	3.99886	4.20921	7.89132	13.8686
2.82449	3.62888	4.58751	7.35233	4.00327	8.2462	9.78447	13.8724
2.82612	3.60588	4.57761	7.35446	4.00759	4.20836	7.92006	13.8775
2.82774	3.63191	4.59206	7.3566	4.01205	8.26368	9.78441	13.8794
2.82936	3.60875	4.58228	7.35869	4.01629	4.20755	7.94854	13.8832
2.83097	3.63493	4.59655	7.36078	4.02075	8.28098	9.78431	13.8874
2.83257	3.61161	4.58689	7.36288	4.02497	4.20677	7.97676	13.8911
2.83417	3.63792	4.60099	7.36496	4.02937	8.29813	9.78437	13.8931
2.83577	3.61444	4.59143	7.36699	4.03359	4.20604	8.0041	13.8967
2.83736	3.64089	4.60537	7.36902	4.03791	8.31511	9.7842	13.9009
2.83894	3.61725	4.59593	7.37107	4.04219	4.20532	8.03201	13.903
2.84052	3.64384	4.60969	7.37306	4.04639	8.33192	9.78389	13.9079
2.84209	3.62004	4.60037	7.37508	4.05072	4.20464	8.05901	13.9094
2.84365	3.64677	4.61395	7.37705	4.05488	8.34858	9.78359	13.913
2.84522	3.62282	4.60476	7.37902	4.05911	4.204	8.08607	13.9161
2.84677	3.64968	4.61818	7.38098	4.06334	8.36505	9.7832	13.9205
2.84832	3.62557	4.6091	7.38295	4.06749	4.20342	8.1129	13.9235
2.84986	3.65257	4.62235	7.38489	4.07169	8.38138	9.78274	13.9267
2.8514	3.62831	4.6134	7.38681	4.0758	4.20286	8.13933	13.9298
2.85294	3.65544	4.62647	7.38872	4.08003	8.39757	9.78224	13.9329
2.85447	3.63102	4.61764	7.39062	4.08414	4.20229	8.16565	13.936
2.85599	3.65829	4.63054	7.3925	4.08822	8.41358	9.78164	13.939
2.8575	3.63372	4.62184	7.39438	4.09235	4.2018	8.19161	13.9422
2.85902	3.66112	4.63457	7.39625	4.09648	8.42947	9.781	13.945
2.86052	3.6364	4.62599	7.39812	4.10053	4.2013	8.21734	13.9474
2.86202	3.66392	4.63855	7.39999	4.10457	8.44515	9.78031	13.9505
2.86352	3.63906	4.6301	7.40183	4.10868	4.20089	8.24306	13.9535
2.86501	3.66671	4.64249	7.40366	4.11269	8.46071	9.77948	13.9552
2.86649	3.6417	4.63416	7.40551	4.11669	4.2005	8.26834	13.9577
2.86797	3.66948	4.64638	7.40736	4.12065	8.47612	9.77863	13.9627
2.86944	3.64432	4.63818	7.40922	4.12486	4.20009	8.29348	13.9654
2.87091	3.67223	4.65023	7.41103	4.12863	8.49139	9.7777	13.9684
2.87237	3.64692	4.64216	7.41282	4.13276	4.19974	8.31852	13.9713
2.87383	3.67496	4.65403	7.41459	4.1365	8.50647	9.77664	13.9741
2.87528	3.64951	4.6461	7.41636	4.14075	4.19943	8.34328	13.9779
2.87673	3.67767	4.65779	7.41817	4.14429	8.52143	9.77553	13.9806
2.87817	3.65207	4.64999	7.41996	4.14868	4.19914	8.36788	13.9825
2.87961	3.68037	4.66151	7.42168	4.15219	8.53623	9.77432	13.9856
2.88104	3.65462	4.65384	7.42344	4.15637	4.19889	8.39228	13.9883
2.88246	3.68304	4.66519	7.42521	4.16005	8.55089	9.77302	13.9926
2.88388	3.65715	4.65764	7.42699	4.16395	4.19867	8.41651	13.995
2.8853	3.68569	4.66882	7.42874	4.16782	8.5654	9.77163	13.9966
2.88671	3.65966	4.6614	7.4304	4.17178	4.19846	8.44041	13.9995
2.88811	3.68833	4.67241	7.43207	4.17546	8.57956	9.77019	14.0032
2.88951	3.66216	4.66513	7.4338	4.1794	4.19846	8.46435	14.0059
2.89091	3.69094	4.67596	7.43552	4.18311	8.59397	9.76859	14.0087
2.8923	3.66463	4.66882	7.4372	4.18695	4.19818	8.4881	14.0114
2.89368	3.69354	4.67948	7.43888	4.19069	8.60805	9.7669	14.0129
2.89506	3.66709	4.67246	7.4405	4.19448	4.19805	8.51168	14.0157
2.89643	3.69612	4.68295	7.44209	4.19819	8.62201	9.7651	14.0184
2.8978	3.66954	4.67607	7.4437	4.20244	4.19798	8.53502	14.0216
2.89916	3.69868	4.68638	7.44534	4.20512	8.63556	9.76324	14.0229
2.90053	3.67196	4.67964	7.44688	4.20981	4.1981	8.55835	14.0264
2.90187	3.70122	4.68977	7.44847	4.21277	8.6494	9.76121	14.0279
2.90323	3.67437	4.68317	7.45004	4.21701	4.19792	8.58154	14.0305
2.90456	3.70375	4.69313	7.45156	4.22027	8.66297	9.75907	14.0329
2.9059	3.67676	4.68667	7.45311	4.22423	4.19791	8.60461	14.0351
2.90723	3.70625	4.69645	7.4546	4.22765	8.67633	9.7568	14.0376
2.90856	3.67913	4.69013	7.45613	4.23143	4.19794	8.62754	14.0407
2.90989	3.70874	4.69973	7.45767	4.23497	8.68961	9.75442	14.0433
2.9112	3.68149	4.69355	7.45919	4.23862	4.19796	8.65036	14.0443
2.91252	3.71121	4.70297	7.46066	4.24221	8.7025	9.75191	14.0467
2.91382	3.68384	4.69694	7.4621	4.24576	4.19823	8.6731	14.0502
2.91513	3.71367	4.70618	7.46359	4.24936	8.71566	9.74924	14.0508
2.91642	3.68616	4.70029	7.465	4.25291	4.1982	8.69572	14.0534
2.91772	3.7161	4.70935	7.46645	4.25645	8.72847	9.74645	14.0554
2.919	3.68847	4.70361	7.4679	4.26023	4.19835	8.71823	14.0576
2.92028	3.71852	4.71249	7.4693	4.26321	8.7565	9.74357	14.0599
2.92157	3.69054	4.7069	7.47075	4.26721	4.18711	8.74073	14.0619
2.92284	3.72087	4.7156	7.47215	4.27034	8.76877	9.74048	14.0641
2.92411	3.69279	4.71015	7.47353	4.27411	4.1876	8.76313	14.0663
2.92537	3.72323	4.71866	7.47495	4.27736	8.76621	9.73723	14.0684
2.92663	3.69523	4.71337	7.47637	4.28091	4.19887	8.78549	14.0706
2.92788	3.72562	4.72169	7.47779	4.28442	8.79212	9.7338	14.0741
2.92913	3.69729	4.71656	7.47923	4.28768	4.1888	8.80779	14.0761
2.93038	3.72793	4.72469	7.48064	4.29128	8.80524	9.73021	14.0769
2.93161	3.69948	4.71971	7.48197	4.29454	4.18848	8.83005	14.0815
2.93285	3.73024	4.72766	7.48345	4.29803	8.81717	9.72644	14.082
2.93408	3.70166	4.72283	7.48491	4.30138	4.18876	8.85229	14.0858
2.93531	3.73253	4.73059	7.48639	4.30472	8.82895	9.72247	14.0876
2.93653	3.70384	4.72592	7.48785	4.30791	4.18541	8.87451	14.0903
2.93775	3.73473	4.73349	7.4893	4.31172	8.84371	9.71832	14.0911
2.93895	3.70589	4.72898	7.49071	4.31456	4.18393	8.89666	14.0934
2.94016	3.73691	4.73636	7.49209	4.31826	8.85513	9.71401	14.0957
2.94136	3.70796	4.73202	7.49351	4.3213	4.18415	8.91886	14.0978
2.94256	3.73909	4.7392	7.49493	4.32478	8.86622	9.70945	14.1
2.94375	3.71003	4.73503	7.49634	4.32794	4.18455	8.94109	14.1031
2.94494	3.74126	4.74201	7.49775	4.33128	8.87716	9.70466	14.1052
2.94612	3.71209	4.73801	7.49913	4.3345	4.18499	8.96329	14.1062
2.9473	3.74341	4.74479	7.50047	4.33775	8.88802	9.69968	14.1084
2.94848	3.71413	4.74096	7.50179	4.34102	4.18544	8.98556	14.1105
2.94965	3.74555	4.74754	7.50314	4.34423	8.89876	9.69442	14.1124
2.95081	3.71616	4.74388	7.50448	4.34743	4.18593	9.00786	14.1144
2.95197	3.74768	4.75026	7.50581	4.35066	8.90939	9.68893	14.1164
2.95313	3.71818	4.74678	7.50709	4.3538	4.18643	9.03023	14.1196
2.95428	3.7498	4.75295	7.5084	4.35703	8.91993	9.68316	14.1201
2.95543	3.72019	4.74965	7.50968	4.36016	4.18698	9.05263	14.1213
2.95657	3.7519	4.7556	7.51094	4.36331	8.93034	9.67714	14.1254
2.95771	3.72219	4.75249	7.51227	4.3665	4.18754	9.07509	14.1258
2.95884	3.754	4.75823	7.51355	4.36955	8.94066	9.67085	14.1283
2.95997	3.72418	4.75531	7.51483	4.37228	4.18814	9.09758	14.1298
2.9611	3.75608	4.76083	7.51605	4.37637	8.95086	9.66431	14.1318
2.96221	3.72616	4.7581	7.51726	4.37846	4.18876	9.12012	14.1336
2.96333	3.75814	4.7634	7.51847	4.38236	8.96096	9.65744	14.1356
2.96444	3.72812	4.76086	7.51972	4.38476	4.18941	9.14276	14.1374
2.96555	3.7602	4.76594	7.52097	4.38838	8.97098	9.65032	14.1391
2.96665	3.73007	4.7636	7.52216	4.39095	4.19006	9.16542	14.1422
2.96775	3.76224	4.76845	7.52342	4.39435	8.98086	9.64295	14.1427
2.96884	3.73202	4.76631	7.52461	4.39712	4.19078	9.18811	14.1449
2.96993	3.76427	4.77094	7.52584	4.40034	8.99061	9.63532	14.1458
2.97102	3.73395	4.769	7.52706	4.40317	4.19153	9.21078	14.1484
2.9721	3.76629	4.7734	7.52829	4.40631	9.00031	9.62781	14.1501
2.97318	3.73586	4.77168	7.52951	4.4093	4.19226	9.23293	14.152
2.97425	3.76829	4.77586	7.53071	4.41207	9.00986	9.62033	14.1552
2.97532	3.73777	4.77434	7.53193	4.41532	4.19307	9.25513	14.1566
2.97638	3.77028	4.77829	7.53313	4.41789	9.01933	9.61257	14.1585
2.97744	3.73967	4.77698	7.5343	4.4212	4.19387	9.27727	14.159
2.9785	3.77226	4.7807	7.53541	4.42381	9.02875	9.6047	14.1623
2.97955	3.74155	4.7796	7.53659	4.427	4.19467	9.29928	14.1627
2.9806	3.77423	4.78309	7.53774	4.42964	9.03862	9.59676	14.1653
2.98164	3.74342	4.78219	7.53891	4.43275	4.19508	9.32099	14.1669
2.98268	3.77619	4.78545	7.54007	4.43546	9.04716	9.58892	14.1688
2.98372	3.74529	4.78475	7.54122	4.43848	4.19643	9.34231	14.1706
2.98475	3.77814	4.78779	7.54236	4.44116	9.05616	9.58127	14.1713
2.98577	3.74715	4.7873	7.54347	4.44411	4.19738	9.36312	14.1732
2.9868	3.78007	4.79012	7.5446	4.44697	9.06512	9.57397	14.1748
2.98781	3.74899	4.78982	7.54573	4.44974	4.19832	9.38324	14.1765
2.98883	3.78199	4.79243	7.54686	4.45258	9.07396	9.56715	14.1781
2.98984	3.75082	4.79231	7.54798	4.45539	4.19931	9.40257	14.1798
2.99085	3.7839	4.79472	7.5491	4.45817	9.08269	9.56096	14.1815
2.99185	3.75264	4.79478	7.55021	4.46096	4.20031	9.42099	14.1831
2.99285	3.7858	4.797	7.55132	4.46374	9.09138	9.55551	14.1848
2.99384	3.75445	4.79722	7.55243	4.46647	4.20131	9.43833	14.1864
2.99483	3.78768	4.79926	7.55352	4.46926	9.0999	9.55094	14.1896
2.99582	3.75625	4.79963	7.55463	4.47218	4.20238	9.45492	14.1887
2.9968	3.78956	4.80152	7.55567	4.47442	9.10836	9.54707	14.1915
2.99778	3.75804	4.80204	7.55671	4.4777	4.20345	9.4702	14.1939
2.99875	3.79142	4.80378	7.55779	4.47988	9.11669	9.54437	14.1955
2.99973	3.75982	4.80441	7.55884	4.48322	4.20456	9.48413	14.1971
3.00069	3.79328	4.80602	7.55988	4.4851	9.12496	9.54286	14.1972
3.00166	3.76159	4.80676	7.5609	4.48861	4.2057	9.49673	14.199
3.00261	3.79512	4.80826	7.56196	4.49047	9.1331	9.54247	14.2017
3.00358	3.76335	4.80908	7.56302	4.49387	4.20686	9.50808	14.1944
3.00452	3.79695	4.81049	7.56387	4.49581	9.14116	9.54317	14.2048
3.00547	3.7651	4.81138	7.565	4.4991	4.20803	9.51831	14.2045
3.00641	3.79877	4.8127	7.56608	4.5013	9.14912	9.54477	14.2068
3.00736	3.76684	4.81365	7.5671	4.50407	4.20925	9.52755	14.2092
3.00829	3.80057	4.81491	7.56812	4.50661	9.15722	9.54723	14.2093
3.00923	3.76859	4.8159	7.5691	4.50924	4.21029	9.53586	14.211
3.01015	3.8024	4.81711	7.57005	4.51185	9.16487	9.55043	14.2122
3.01108	3.77031	4.81813	7.57098	4.51434	4.21177	9.5434	14.2136
3.012	3.80419	4.8193	7.57195	4.517	9.17093	9.55418	14.2161
3.01292	3.77204	4.82034	7.57294	4.51945	4.21418	9.55035	14.2175
3.01383	3.80596	4.82148	7.57391	4.52206	9.18032	9.5584	14.2189
3.01474	3.77374	4.82253	7.57486	4.52471	4.21418	9.55678	14.2189
3.01565	3.80775	4.82364	7.57579	4.5269	9.1878	9.56294	14.2206
3.01655	3.77543	4.82469	7.57674	4.52983	4.21566	9.56282	14.2217
3.01745	3.8095	4.82579	7.5777	4.53191	9.19538	9.56772	14.2244
3.01835	3.77713	4.82684	7.57866	4.53463	4.21688	9.56862	14.2242
3.01924	3.81127	4.82792	7.57954	4.53716	9.20278	9.57263	14.2259
3.02012	3.77883	4.82898	7.58042	4.53953	4.21829	9.57418	14.227
3.02101	3.81303	4.83005	7.58134	4.54208	9.21009	9.57764	14.229
3.02189	3.78052	4.8311	7.58228	4.54429	4.21976	9.5796	14.2309
3.02277	3.81478	4.83216	7.58323	4.54719	9.21725	9.58266	14.2307
3.02364	3.7822	4.8332	7.58411	4.54913	4.22126	9.58485	14.2324
3.02451	3.81652	4.83425	7.58503	4.55202	9.22436	9.58772	14.2336
3.02538	3.78386	4.83529	7.586	4.55398	4.22277	9.59003	14.2348
3.02625	3.81825	4.83633	7.5869	4.557	9.23137	9.59276	14.2362
3.0271	3.78552	4.83736	7.58779	4.55862	4.2243	9.59511	14.2368
3.02796	3.81996	4.83839	7.58868	4.56177	9.23828	9.59775	14.239
3.02881	3.78717	4.83941	7.58965	4.56345	4.22587	9.60016	14.2413
3.02967	3.82167	4.84044	7.59059	4.56648	9.24509	9.6027	14.2425
3.0305	3.78881	4.84145	7.5915	4.56817	4.22747	9.60515	14.2426
3.03135	3.82336	4.84247	7.59234	4.5712	9.25182	9.60762	14.2456
3.03219	3.79044	4.84348	7.59326	4.57287	4.22908	9.61005	14.2451
3.03303	3.82505	4.84448	7.59415	4.57585	9.25845	9.61249	14.246
3.03385	3.79206	4.84549	7.59504	4.57757	4.23073	9.61492	14.2479
3.03469	3.82672	4.84649	7.59593	4.58045	9.265	9.61733	14.2491
3.03551	3.79367	4.84748	7.59679	4.58221	4.23239	9.61971	14.2502
3.03634	3.82839	4.84847	7.5976	4.58503	9.27143	9.62213	14.2515
3.03715	3.79527	4.84946	7.59844	4.58681	4.23411	9.62448	14.2525
3.03797	3.83004	4.85045	7.59923	4.58958	9.27779	9.62687	14.255
3.03878	3.79686	4.85143	7.6001	4.59134	4.23584	9.62919	14.256
3.03959	3.83169	4.85241	7.60096	4.59409	9.28407	9.63156	14.256
3.04039	3.79845	4.85338	7.60179	4.59592	4.23758	9.63388	14.2574
3.0412	3.83332	4.85436	7.60263	4.59849	9.29024	9.63619	14.2584
3.04199	3.80002	4.85533	7.60347	4.60046	4.23936	9.63848	14.2609
3.04279	3.83495	4.85629	7.60434	4.6029	9.29635	9.64079	14.262
3.04358	3.80159	4.85725	7.60519	4.60491	4.24115	9.64305	14.262
3.04437	3.83656	4.85821	7.60598	4.60729	9.30234	9.64532	14.2632
3.04516	3.80315	4.85917	7.60676	4.60935	4.24301	9.64761	14.2642
3.04594	3.83817	4.86012	7.60755	4.61166	9.30856	9.64978	14.2664
3.04672	3.8047	4.86107	7.60839	4.61391	4.24467	9.65207	14.2662
3.04749	3.83977	4.86201	7.60917	4.61572	9.31442	9.65425	14.2676
3.04827	3.80624	4.86296	7.60992	4.61832	4.24657	9.65646	14.2685
3.04904	3.84136	4.8639	7.61068	4.62006	9.32015	9.65865	14.2695
3.04981	3.80778	4.86483	7.61143	4.62262	4.2485	9.66084	14.2706
3.05057	3.84295	4.86577	7.61218	4.62434	9.32581	9.66301	14.2716
3.05133	3.80931	4.86669	7.61293	4.62683	4.25043	9.66516	14.2727
3.05208	3.84452	4.86762	7.61372	4.62862	9.3314	9.66731	14.2738
3.05284	3.81083	4.86854	7.61454	4.63107	4.25242	9.66945	14.2749
3.05359	3.84608	4.86946	7.61534	4.63283	9.3369	9.67157	14.2761
3.05434	3.81235	4.87038	7.61613	4.63523	4.25445	9.67368	14.2784
3.05508	3.84765	4.87129	7.61693	4.65187	9.34236	9.67579	14.2795
3.05568	3.81386	4.8722	7.61771	4.61816	4.25649	9.6779	14.2806
3.05681	3.8492	4.87311	7.61847	4.66216	9.34769	9.67999	14.2816
3.05713	3.81537	4.87402	7.61923	4.62312	4.25857	9.68207	14.2812
3.05826	3.85074	4.87493	7.61993	4.66544	9.35294	9.68413	14.2833
3.0586	3.81686	4.87583	7.62068	4.62804	4.26067	9.68618	14.2844
3.05971	3.85228	4.87673	7.62149	4.66841	9.35815	9.68823	14.2865
3.06006	3.81836	4.87763	7.62232	4.63323	4.2628	9.69024	14.2863
3.06114	3.85381	4.87852	7.62307	4.67173	9.36328	9.69226	14.2875
3.0615	3.81984	4.87941	7.6238	4.63775	4.26497	9.69425	14.2886
3.06256	3.85534	4.8803	7.62457	4.67531	9.3683	9.69625	14.2898
3.06293	3.82132	4.88118	7.62536	4.64211	4.26715	9.69821	14.2917
3.06398	3.85685	4.88206	7.62613	4.67895	9.37327	9.70019	14.293
3.06435	3.82279	4.88294	7.62691	4.64614	4.26935	9.70214	14.2925
3.06539	3.85836	4.88382	7.62759	4.68298	9.37815	9.70407	14.294
3.06575	3.82426	4.88469	7.62832	4.65027	4.2716	9.70602	14.2949
3.06678	3.85986	4.88556	7.6291	4.68655	9.38293	9.70792	14.2952
3.06714	3.82571	4.88643	7.6298	4.65442	4.27387	9.70983	14.2962
3.06817	3.86135	4.88729	7.63048	4.69025	9.38765	9.71172	14.2973
3.06852	3.82716	4.88815	7.63115	4.65866	4.27617	9.7136	14.2982
3.06954	3.86284	4.88901	7.63183	4.69386	9.39228	9.71547	14.2992
3.06989	3.82861	4.88987	7.63255	4.6623	4.27851	9.71732	14.3001
3.0709	3.86431	4.89072	7.63328	4.69772	9.39682	9.71917	14.3014
3.07125	3.83004	4.89157	7.63395	4.6662	4.28085	9.721	14.3025
3.07225	3.86578	4.89242	7.63461	4.70165	9.40131	9.72282	14.3046
3.07259	3.83147	4.89327	7.63531	4.66965	4.28322	9.72462	14.3039
3.07359	3.86724	4.89411	7.63594	4.70568	9.40571	9.72641	14.3053
3.07393	3.83289	4.89495	7.63662	4.67342	4.28562	9.72819	14.3056
3.07492	3.86869	4.89579	7.63729	4.70929	9.41005	9.72996	14.3066
3.07525	3.83431	4.89663	7.63794	4.67695	4.28804	9.73172	14.3074
3.07624	3.87013	4.89746	7.6386	4.71346	9.4143	9.73346	14.3083
3.07656	3.83571	4.89829	7.63925	4.68011	4.29049	9.7352	14.3091
3.07756	3.87157	4.89912	7.63992	4.7175	9.41848	9.73691	14.31
3.07786	3.83712	4.89994	7.6406	4.68336	4.29296	9.73862	14.311
3.07886	3.873	4.90077	7.64128	4.73671	9.42258	9.74031	14.3119
3.07899	3.83851	4.90159	7.64195	4.66437	4.29549	9.74199	14.3128
3.0804	3.87442	4.90241	7.64262	4.74856	9.42661	9.74365	14.3137
3.08022	3.8399	4.90322	7.64328	4.66646	4.298	9.7453	14.3146
3.08168	3.87584	4.90404	7.64394	4.75369	9.43059	9.74695	14.3155
3.08147	3.84129	4.90485	7.6446	4.66833	4.30058	9.74858	14.3164
3.08296	3.87725	4.90566	7.64525	4.75903	9.43447	9.75019	14.3173
3.08271	3.84267	4.90647	7.6459	4.67	4.30318	9.75179	14.3182
3.08423	3.87865	4.90727	7.64655	4.76455	9.4383	9.75338	14.3191
3.08393	3.84404	4.90808	7.64719	4.67132	4.30579	9.75495	14.32
3.08549	3.88005	4.90888	7.64783	4.77036	9.44207	9.75651	14.3208
3.08515	3.84541	4.90968	7.64847	4.6723	4.30843	9.75806	14.3217
3.08675	3.88144	4.91048	7.6491	4.77648	9.44574	9.75959	14.3226
3.08634	3.84677	4.91127	7.64973	4.67292	4.31107	9.76111	14.3234
3.08799	3.88283	4.91207	7.65035	4.78253	9.44938	9.76262	14.3242
3.08753	3.84813	4.91286	7.65097	4.67374	4.31378	9.76411	14.3251
3.08923	3.88421	4.91365	7.65159	4.78909	9.45292	9.76558	14.3259
3.0887	3.84948	4.91444	7.65221	4.67354	4.31649	9.76705	14.3267
3.09046	3.88558	4.91522	7.65282	4.79626	9.45642	9.76849	14.3275
3.08986	3.85083	4.91601	7.65342	4.67296	4.31926	9.76992	14.3284
3.09169	3.88695	4.91679	7.65403	4.80406	9.45982	9.77134	14.3292
3.091	3.85217	4.91757	7.65463	4.67131	4.32202	9.77274	14.33
3.09292	3.88831	4.91835	7.65523	4.81247	9.46319	9.77413	14.3308
3.09212	3.8535	4.91913	7.65582	4.66949	4.32485	9.7755	14.3316
3.09414	3.88966	4.91991	7.65641	4.82114	9.46645	9.77685	14.3323
3.09322	3.85483	4.92068	7.65699	4.66717	4.32769	9.77819	14.3331
3.09535	3.89101	4.92146	7.65758	4.83035	9.46967	9.77951	14.334
3.09432	3.85616	4.92223	7.65819	4.66403	4.33053	9.78081	14.3348
3.09656	3.89235	4.923	7.65881	4.84039	9.47283	9.7821	14.3356
3.09539	3.85748	4.92377	7.65942	4.66009	4.3334	9.78337	14.3365
3.09777	3.89369	4.92454	7.66003	4.8502	9.47592	9.78463	14.3371
3.09645	3.85879	4.92531	7.66061	4.65673	4.33631	9.78585	14.3379
3.09896	3.89502	4.92608	7.66117	4.86141	9.47895	9.78707	14.3387
3.09748	3.8601	4.92684	7.66173	4.65098	4.33923	9.78827	14.3394
3.10016	3.89634	4.92761	7.66228	4.87414	9.48192	9.78946	14.3402
3.09849	3.8614	4.92837	7.66286	4.64395	4.34219	9.79061	14.3409
3.10136	3.89766	4.92914	7.66344	4.88789	9.48484	9.79175	14.3416
3.09948	3.86271	4.9299	7.664	4.63596	4.34516	9.79287	14.3424
3.10256	3.89897	4.93066	7.66454	4.90305	9.48768	9.79397	14.3431
3.10044	3.864	4.93142	7.66507	4.62624	4.34817	9.79504	14.3438
3.10377	3.90028	4.93218	7.6656	4.91982	9.49047	9.79609	14.3445
3.10137	3.86529	4.93294	7.66613	4.61489	4.3512	9.79713	14.3453
3.10497	3.90159	4.9337	7.66669	4.93825	9.49319	9.79813	14.346
3.10226	3.86658	4.93446	7.66726	4.60177	4.35425	9.79911	14.3467
3.10618	3.90289	4.93522	7.66782	4.95844	9.49587	9.80007	14.3474
3.10313	3.86786	4.93598	7.66835	4.60028	4.35734	9.801	14.3481
3.10727	3.90418	4.93674	7.66887	4.95937	9.49847	9.80192	14.3488
3.10423	3.86914	4.9375	7.66938	4.59175	4.36042	9.80279	14.3494
3.10845	3.90547	4.93826	7.66989	4.99867	9.50103	9.80365	14.3501
3.10484	3.87041	4.93902	7.6704	4.55037	4.36357	9.80447	14.3507
3.10989	3.90675	4.93978	7.6709	5.0494	9.50351	9.80527	14.3514
3.10533	3.87168	4.94054	7.67141	4.50453	4.3667	9.80602	14.352
3.11132	3.90803	4.9413	7.67191	5.10389	9.50597	9.80676	14.3527
3.10574	3.87294	4.94206	7.67241	4.45552	4.36988	9.80746	14.3533
3.11273	3.9093	4.94282	7.67291	5.16112	9.50835	9.80813	14.3539
3.10607	3.8742	4.94359	7.6734	4.40445	4.3731	9.80875	14.3546
3.11409	3.91057	4.94435	7.67389	5.21961	9.51068	9.80936	14.3552
3.10633	3.87546	4.94512	7.67438	4.35292	4.37631	9.8099	14.3559
3.11539	3.91183	4.94589	7.67487	5.27729	9.51298	9.81043	14.3564
3.10654	3.87671	4.94665	7.67536	4.30309	4.37957	9.8109	14.357
3.11662	3.91309	4.94742	7.67584	5.33179	9.5152	9.81135	14.3577
3.10674	3.87796	4.9482	7.67633	4.25707	4.38284	9.81175	14.3583
3.11775	3.91434	4.94897	7.67681	5.38113	9.51738	9.81209	14.3589
3.10695	3.8792	4.94975	7.67728	4.21652	4.38614	9.8124	14.3595
3.11878	3.91559	4.95053	7.67776	5.42384	9.51948	9.81266	14.3601
3.10719	3.88044	4.95131	7.67823	4.18235	4.38944	9.81288	14.3607
3.11973	3.91684	4.95209	7.6787	5.45961	9.52158	9.81302	14.3613
3.10748	3.88168	4.95288	7.67917	4.15465	4.39278	9.81317	14.3619
3.1206	3.91808	4.95367	7.67964	5.48869	9.52359	9.81321	14.3625
3.10783	3.88291	4.95447	7.6801	4.13289	4.39613	9.81323	14.363
3.1214	3.91932	4.95526	7.68057	5.51203	9.52557	9.81319	14.3636
3.10822	3.88413	4.95607	7.68102	4.1161	4.39951	9.81311	14.3642
3.12216	3.92055	4.95687	7.68148	5.53063	9.52749	9.81295	14.3648
3.10866	3.88536	4.95768	7.68194	4.10337	4.40293	9.81276	14.3654
3.12289	3.92177	4.95849	7.68242	5.54561	9.52935	9.81253	14.366
3.10913	3.88658	4.95931	7.68291	4.09368	4.40633	9.81222	14.3667
3.12358	3.92299	4.96014	7.68339	5.55779	9.53119	9.8119	14.3673
3.10963	3.88779	4.96096	7.68387	4.08627	4.40977	9.8115	14.3679
3.12426	3.92421	4.9618	7.68433	5.56808	9.53298	9.81107	14.3685
3.11014	3.889	4.96264	7.68477	4.0805	4.41325	9.81062	14.369
3.12493	3.92542	4.96348	7.6852	5.57651	9.5347	9.81012	14.3696
3.11068	3.89021	4.96433	7.68564	4.07626	4.4167	9.80961	14.371
3.12559	3.92663	4.96518	7.68607	5.58416	9.53641	9.80908	14.3712
3.11122	3.89141	4.96604	7.68649	4.07258	4.42022	9.80851	14.3721
3.12624	3.92784	4.96691	7.68691	5.59124	9.53804	9.80795	14.3724
3.11177	3.89261	4.96778	7.68732	4.0694	4.42374	9.80745	14.373
3.12689	3.92904	4.96866	7.68773	5.5979	9.53967	9.80693	14.3734
3.11232	3.89381	4.96954	7.68814	4.06651	4.42728	9.80643	14.3739
3.12753	3.93023	4.97042	7.68855	5.60432	9.54124	9.80596	14.3745
3.11287	3.895	4.97132	7.68896	4.06383	4.43084	9.80554	14.375
3.12817	3.93143	4.97221	7.68937	5.61057	9.54276	9.80514	14.3757
3.11343	3.89619	4.97311	7.68977	4.06125	4.43442	9.80469	14.3749
3.12881	3.93262	4.97401	7.69016	5.61671	9.54424	9.80439	14.3756
3.11398	3.89738	4.97492	7.69056	4.05881	4.43799	9.80411	14.376
3.12945	3.9338	4.97584	7.69097	5.62347	9.54569	9.8038	14.3765
3.11451	3.89856	4.97675	7.69137	4.0556	4.44161	9.80365	14.377
3.13008	3.93498	4.97767	7.69178	5.62924	9.54709	9.80342	14.3775
3.11507	3.89974	4.97859	7.69218	4.05365	4.44524	9.80334	14.378
3.13071	3.93616	4.97952	7.69258	5.63461	9.54844	9.80318	14.3785
3.11562	3.90091	4.98045	7.69298	4.05183	4.44888	9.80304	14.379
3.13133	3.93733	4.98138	7.69337	5.64024	9.54977	9.80315	14.3795
3.11617	3.90208	4.98231	7.69377	4.04974	4.45255	9.80313	14.3799
3.13196	3.9385	4.98325	7.69416	5.64584	9.55105	9.80315	14.3804
3.11672	3.90325	4.98419	7.69456	4.04768	4.45621	9.80332	14.3809
3.13258	3.93967	4.98513	7.69495	5.6514	9.5523	9.80334	14.3814
3.11726	3.90442	4.98607	7.69534	4.04566	4.45991	9.80366	14.3819
3.1332	3.94083	4.98701	7.69572	5.65695	9.55351	9.80372	14.3823
3.11781	3.90558	4.98795	7.69611	4.04364	4.46361	9.80409	14.3828
3.13382	3.94199	4.98889	7.69649	5.6625	9.55469	9.80421	14.3833
3.11835	3.90673	4.98984	7.69687	4.04155	4.46734	9.80463	14.3837
3.13443	3.94314	4.99078	7.69725	5.66796	9.55583	9.80485	14.3842
3.11888	3.90789	4.99172	7.69763	4.03962	4.47107	9.80538	14.3846
3.13504	3.94429	4.99266	7.69801	5.67343	9.55694	9.8056	14.3851
3.11942	3.90903	4.9936	7.69838	4.03763	4.47482	9.8061	14.3855
3.13565	3.94544	4.99454	7.69876	5.67892	9.55802	9.80672	14.386
3.11995	3.91018	4.99548	7.69913	4.03559	4.47857	9.80699	14.3864
3.13626	3.94658	4.99642	7.6995	5.68434	9.55906	9.80763	14.3869
3.12048	3.91132	4.99736	7.69986	4.03365	4.48235	9.80821	14.3873
3.13686	3.94772	4.99829	7.70023	5.6897	9.56008	9.80858	14.3878
3.12101	3.91246	4.99923	7.70059	4.03168	4.48613	9.80928	14.3881
3.13746	3.94885	5.00016	7.70091	5.69508	9.56105	9.80966	14.3885
3.12153	3.9136	5.00109	7.70123	4.02977	4.48993	9.81037	14.3888
3.13805	3.94998	5.00201	7.70154	5.70029	9.56201	9.81109	14.3892
3.12206	3.91473	5.00294	7.70185	4.02792	4.49373	9.81155	14.3895
3.13864	3.95111	5.00386	7.70216	5.70555	9.56271	9.81227	14.3898
3.12257	3.91584	5.00478	7.70247	4.02602	4.49757	9.81303	14.3901
3.13923	3.9522	5.0057	7.70278	5.71078	9.56358	9.81378	14.3905
3.12309	3.91693	5.00662	7.70309	4.02418	4.5013	9.81431	14.3908
3.13981	3.95329	5.00753	7.7034	5.71588	9.56442	9.8151	14.3911
3.1236	3.91803	5.00844	7.7037	4.02239	4.50504	9.81591	14.3915
3.1404	3.95438	5.00935	7.70401	5.72098	9.56524	9.81651	14.3918
3.12411	3.91912	5.01025	7.70432	4.02058	4.50879	9.81728	14.3921
3.14097	3.95547	5.01115	7.70462	5.72594	9.56604	9.81811	14.3925
3.12462	3.9202	5.01205	7.70493	4.01897	4.51254	9.81893	14.3928
3.14155	3.95655	5.01294	7.70523	5.73069	9.56681	9.81955	14.3931
3.12513	3.92129	5.01384	7.70554	4.01746	4.51631	9.82039	14.3935
3.14212	3.95763	5.01472	7.70584	5.73575	9.56755	9.82125	14.3938
3.12563	3.92237	5.01561	7.70615	4.01558	4.5201	9.82209	14.3941
3.14269	3.95871	5.01649	7.70645	5.74075	9.56827	9.82275	14.3945
3.12613	3.92345	5.01737	7.70675	4.01387	4.52388	9.82359	14.3948
3.14325	3.95978	5.01824	7.70705	5.74568	9.56897	9.82446	14.3951
3.12663	3.92452	5.01912	7.70735	4.01214	4.52767	9.82538	14.3954
3.14381	3.96085	5.01999	7.70765	5.75072	9.56965	9.82623	14.3958
3.12712	3.92559	5.02085	7.70795	4.01032	4.53148	9.8269	14.3961
3.14436	3.96191	5.02171	7.70825	5.75552	9.57033	9.8278	14.3964
3.1276	3.92666	5.02257	7.70854	4.00868	4.53529	9.82868	14.3968
3.14492	3.96297	5.02342	7.70884	5.76035	9.57096	9.82959	14.3971
3.12809	3.92773	5.02428	7.70914	4.00705	4.5391	9.83048	14.3974
3.14546	3.96403	5.02513	7.70943	5.76505	9.57158	9.83117	14.3977
3.12857	3.92879	5.02597	7.70973	4.00545	4.54292	9.83207	14.3981
3.14601	3.96509	5.02681	7.71002	5.76975	9.57217	9.83298	14.3984
3.12905	3.92985	5.02765	7.71031	4.00388	4.54676	9.83389	14.3987
3.14655	3.96614	5.02848	7.7106	5.77436	9.57278	9.83481	14.3991
3.12953	3.93091	5.02931	7.71089	4.00232	4.55059	9.83552	14.3994
3.14709	3.9672	5.03013	7.71118	5.779	9.57334	9.83642	14.3997
3.13	3.93196	5.03095	7.71147	4.00075	4.55443	9.83734	14.4
3.14762	3.96824	5.03177	7.71176	5.78361	9.57387	9.83825	14.4003
3.13047	3.93302	5.03259	7.71205	3.99921	4.55829	9.83917	14.4007
3.14815	3.96929	5.0334	7.71233	5.78808	9.57442	9.84008	14.401
3.13094	3.93407	5.03421	7.71262	3.99774	4.56214	9.84079	14.4013
3.14867	3.97033	5.03501	7.7129	5.79262	9.57494	9.84174	14.4016
3.1314	3.93511	5.0358	7.71318	3.99623	4.566	9.84265	14.4019
3.14919	3.97137	5.0366	7.71346	5.79702	9.57543	9.84356	14.4023
3.13186	3.93616	5.03739	7.71375	3.9948	4.56988	9.84443	14.4026
3.14971	3.97241	5.03818	7.71403	5.80141	9.57591	9.84543	14.4029
3.13232	3.9372	5.03896	7.7143	3.99334	4.57376	9.84633	14.4032
3.15023	3.97344	5.03975	7.71458	5.80583	9.57638	9.84702	14.4035
3.13277	3.93824	5.04052	7.71486	3.99187	4.57763	9.84793	14.4038
3.15074	3.97448	5.04129	7.71514	5.81019	9.57683	9.84884	14.4041
3.13322	3.93927	5.04206	7.71541	3.99043	4.58151	9.84975	14.4044
3.15124	3.9755	5.04283	7.71569	5.81444	9.57726	9.85062	14.4047
3.13367	3.94031	5.04359	7.71596	3.9891	4.5854	9.85154	14.4065
3.15175	3.97653	5.04435	7.71629	5.819	9.57769	9.85246	14.4055
3.13411	3.94133	5.0451	7.71656	3.9874	4.58928	9.85316	14.4063
3.15225	3.97755	5.04585	7.71684	5.82312	9.57809	9.85411	14.4066
3.13456	3.94236	5.0466	7.71716	3.98618	4.59316	9.85497	14.407
3.15274	3.97857	5.04734	7.71748	5.82718	9.57849	9.85591	14.4078
3.135	3.94338	5.04808	7.71783	3.98491	4.59704	9.85675	14.4079
3.15323	3.97958	5.04881	7.71816	5.83131	9.57888	9.85766	14.4084
3.13543	3.9444	5.04955	7.71849	3.98359	4.60092	9.85855	14.4088
3.15372	3.98059	5.05028	7.71881	5.8356	9.57925	9.85946	14.4101
3.13586	3.94541	5.051	7.71913	3.98209	4.6048	9.86014	14.4101
3.15421	3.9816	5.05172	7.71943	5.83962	9.57962	9.86107	14.4107
3.13629	3.94642	5.05244	7.71973	3.98084	4.60867	9.8619	14.411
3.15469	3.9826	5.05315	7.72002	5.84364	9.57997	9.86279	14.4114
3.13671	3.94743	5.05386	7.72031	3.97956	4.61255	9.86368	14.4118
3.15516	3.9836	5.05457	7.72059	5.84763	9.5803	9.86452	14.4123
3.13713	3.94843	5.05527	7.72087	3.97831	4.61643	9.86541	14.4124
3.15564	3.9846	5.05597	7.72115	5.85156	9.58065	9.86629	14.4127
3.13755	3.94943	5.05667	7.72143	3.97708	4.62028	9.86696	14.4131
3.1561	3.98559	5.05736	7.72171	5.8554	9.58096	9.86785	14.4134
3.13797	3.95043	5.05805	7.72198	3.97592	4.62415	9.86869	14.4138
3.15657	3.98658	5.05873	7.72226	5.85931	9.58128	9.8696	14.414
3.13838	3.95142	5.05941	7.72252	3.97464	4.62801	9.87044	14.4144
3.15703	3.98756	5.06008	7.72279	5.8632	9.58159	9.87129	14.4147
3.13879	3.95241	5.06076	7.72305	3.97341	4.63186	9.87212	14.4152
3.15749	3.98854	5.06143	7.72331	5.86705	9.5819	9.87298	14.4154
3.1392	3.9534	5.0621	7.72357	3.97219	4.63573	9.87384	14.4157
3.15795	3.98952	5.06277	7.72383	5.87082	9.5822	9.87449	14.416
3.1396	3.95438	5.06342	7.72409	3.97103	4.63957	9.87535	14.4163
3.1584	3.9905	5.06408	7.72434	5.87459	9.5825	9.87617	14.4164
3.14	3.95536	5.06473	7.7246	3.96982	4.64343	9.87701	14.4168
3.15885	3.99147	5.06538	7.72487	5.87834	9.58278	9.87783	14.4171
3.1404	3.95634	5.06602	7.72513	3.96865	4.64727	9.87866	14.4173
3.15929	3.99244	5.06666	7.72539	5.88202	9.58303	9.87945	14.4177
3.14079	3.95731	5.0673	7.72565	3.96749	4.65113	9.88033	14.418
3.15973	3.99341	5.06794	7.72591	5.88567	9.58328	9.88114	14.4183
3.14118	3.95828	5.06858	7.72617	3.96639	4.65498	9.88196	14.4187
3.16017	3.99437	5.06921	7.72643	5.8893	9.58354	9.8826	14.419
3.14157	3.95924	5.06983	7.72668	3.96524	4.6588	9.88342	14.4193
3.1606	3.99533	5.07045	7.72693	5.89289	9.58379	9.88422	14.4196
3.14195	3.9602	5.07107	7.72717	3.96414	4.66262	9.885	14.4199
3.16103	3.99628	5.07168	7.72742	5.89644	9.58403	9.88581	14.4202
3.14233	3.96116	5.07229	7.72766	3.96305	4.66645	9.88661	14.4205
3.16146	3.99723	5.0729	7.72791	5.89995	9.58427	9.8874	14.4208
3.14271	3.96211	5.07351	7.72815	3.96199	4.67025	9.88816	14.421
3.16188	3.99818	5.07411	7.72839	5.90343	9.58449	9.88897	14.4213
3.14309	3.96306	5.07472	7.72863	3.96091	4.67405	9.88976	14.4216
3.1623	3.99912	5.07532	7.72887	5.90693	9.58471	9.89054	14.4219
3.14346	3.964	5.07591	7.7291	3.95982	4.67785	9.89134	14.4221
3.16272	4.00006	5.07651	7.72934	5.91038	9.58493	9.89192	14.4224
3.14383	3.96495	5.07709	7.72957	3.95875	4.68163	9.89271	14.4227
3.16313	4.00099	5.07768	7.72981	5.91377	9.58515	9.89351	14.423
3.14419	3.96588	5.07826	7.73004	3.95775	4.68538	9.89424	14.4232
3.16354	4.00192	5.07883	7.73027	5.91712	9.58535	9.89502	14.4234
3.14456	3.96681	5.07941	7.7305	3.95672	4.68916	9.89575	14.4237
3.16395	4.00284	5.07998	7.73073	5.92048	9.58556	9.89655	14.4241
3.14492	3.96774	5.08055	7.73095	3.95569	4.6929	9.89729	14.4243
3.16435	4.00376	5.08112	7.73118	5.92378	9.58575	9.89801	14.4246
3.14528	3.96866	5.08168	7.7314	3.9547	4.69664	9.89878	14.4248
3.16475	4.00468	5.08224	7.73162	5.92707	9.58597	9.89953	14.4251
3.14563	3.96958	5.08281	7.73185	3.95369	4.70036	9.90027	14.4253
3.16514	4.00559	5.08336	7.73207	5.93032	9.58616	9.90102	14.4255
3.14598	3.97049	5.08392	7.73229	3.95272	4.70408	9.90157	14.4258
3.16554	4.0065	5.08447	7.73251	5.93354	9.58635	9.90231	14.426
3.14633	3.9714	5.08501	7.73272	3.95174	4.70779	9.90304	14.4263
3.16593	4.0074	5.08555	7.73294	5.93673	9.58655	9.90376	14.4265
3.14668	3.97231	5.08609	7.73316	3.95078	4.71148	9.90448	14.4269
3.16631	4.0083	5.08663	7.73337	5.93991	9.58672	9.90519	14.4271
3.14702	3.97321	5.08716	7.73359	3.94981	4.71517	9.90591	14.4273
3.1667	4.0092	5.08769	7.73379	5.94301	9.58691	9.90662	14.4275
3.14736	3.97411	5.08822	7.734	3.94893	4.71884	9.90735	14.4277
3.16708	4.01009	5.08875	7.73421	5.94612	9.5871	9.90802	14.4279
3.1477	3.975	5.08927	7.73442	3.94797	4.72249	9.90874	14.4281
3.16745	4.01097	5.0898	7.73463	5.94922	9.58728	9.90945	14.4284
3.14803	3.97589	5.09032	7.73483	3.94705	4.72614	9.91015	14.4286
3.16783	4.01185	5.09084	7.73504	5.95223	9.58745	9.91085	14.4288
3.14837	3.97677	5.09135	7.73524	3.94618	4.72977	9.91136	14.4291
3.1682	4.01273	5.09186	7.73545	5.95524	9.58763	9.91206	14.4293
3.1487	3.97765	5.09237	7.73565	3.9453	4.7334	9.91274	14.4295
3.16857	4.01361	5.09287	7.73585	5.95824	9.5878	9.91342	14.4298
3.14902	3.97852	5.09337	7.73605	3.94439	4.737	9.9141	14.43
3.16893	4.01447	5.09387	7.73625	5.96121	9.58791	9.91478	14.4302
3.14935	3.97939	5.09437	7.73645	3.94352	4.74066	9.91542	14.4305
3.16929	4.01534	5.09486	7.73665	5.96415	9.58815	9.91613	14.4307
3.14967	3.98026	5.09535	7.73685	3.94263	4.74418	9.91681	14.4309
3.16965	4.0162	5.09584	7.73705	5.96708	9.58827	9.91747	14.4311
3.14999	3.98113	5.09633	7.73724	3.94177	4.74783	9.91814	14.4314
3.17001	4.01706	5.09681	7.73744	5.96995	9.58854	9.9188	14.4316
3.1503	3.98199	5.09729	7.73763	3.94095	4.75132	9.91946	14.4318
3.17036	4.01792	5.09778	7.73782	5.97283	9.58874	9.9201	14.432
3.15062	3.98284	5.09826	7.73802	3.94008	4.75487	9.92078	14.4322
3.17071	4.01877	5.09873	7.73821	5.97564	9.5889	9.92147	14.4325
3.15093	3.9837	5.09921	7.7384	3.93928	4.75841	9.92207	14.4324
3.17106	4.01962	5.09969	7.73854	5.97846	9.58908	9.92273	14.4327
3.15124	3.98455	5.10016	7.73871	3.93844	4.76195	9.92322	14.4325
3.1714	4.02046	5.10062	7.73885	5.98124	9.58923	9.92382	14.4329
3.15154	3.98539	5.10108	7.73897	3.93764	4.76547	9.92449	14.433
3.17174	4.0213	5.10154	7.73914	5.98397	9.5894	9.92507	14.433
3.15185	3.98623	5.102	7.73928	3.93685	4.76897	9.92571	14.4331
3.17208	4.02213	5.10245	7.7394	5.98672	9.58975	9.92629	14.4332
3.15215	3.98706	5.10291	7.73952	3.93605	4.77228	9.92692	14.4333
3.17242	4.02295	5.10336	7.73965	5.98943	9.58969	9.92754	14.4333
3.15245	3.98787	5.1038	7.73977	3.93525	4.7758	9.92822	14.4334
3.17275	4.02376	5.10425	7.7399	5.99211	9.5899	9.92881	14.4335
3.15274	3.98868	5.10469	7.74003	3.93449	4.7791	9.92942	14.4336
3.17308	4.02457	5.10513	7.74015	5.99477	9.59008	9.92998	14.4337
3.15304	3.98949	5.10557	7.74028	3.93371	4.78248	9.93061	14.4338
3.17341	4.02538	5.10601	7.74041	5.99742	9.59022	9.93121	14.4339
3.15333	3.9903	5.10645	7.74054	3.93292	4.78588	9.93187	14.434
3.17373	4.02618	5.10689	7.74066	6.00005	9.59038	9.93242	14.4341
3.15361	3.9911	5.10732	7.74079	3.93215	4.78924	9.93303	14.4342
3.17405	4.02698	5.10775	7.74092	6.00262	9.59054	9.93363	14.4343
3.1539	3.9919	5.10819	7.74105	3.93143	4.79261	9.93422	14.4345
3.17437	4.02777	5.10861	7.74118	6.0052	9.59069	9.93464	14.4343
3.15418	3.9927	5.10904	7.74131	3.93068	4.79595	9.93524	14.4345
3.17469	4.02857	5.10946	7.74145	6.00773	9.59084	9.93578	14.4346
3.15447	3.99349	5.10987	7.74159	3.92997	4.79929	9.93638	14.4348
3.175	4.02935	5.11028	7.74172	6.01023	9.59099	9.93695	14.4349
3.15474	3.99428	5.1107	7.74185	3.92925	4.80262	9.93752	14.4349
3.17531	4.03013	5.11111	7.74198	6.01275	9.59115	9.9381	14.4352
3.15502	3.99506	5.11152	7.74211	3.92851	4.8059	9.93867	14.4353
3.17562	4.03091	5.11192	7.74224	6.01521	9.59129	9.93923	14.4354
3.1553	3.99584	5.11232	7.74237	3.92783	4.80921	9.93977	14.4355
3.17592	4.03169	5.11272	7.7425	6.01766	9.59145	9.94033	14.4356
3.15557	3.99661	5.11313	7.74263	3.92713	4.81248	9.94089	14.4357
3.17623	4.03246	5.11353	7.74277	6.02006	9.5916	9.94145	14.4358
3.15584	3.99738	5.11393	7.7429	3.92646	4.81574	9.94201	14.4359
3.17653	4.03322	5.11433	7.74303	6.02246	9.59175	9.94256	14.436
3.15611	3.99815	5.11472	7.74316	3.92579	4.81898	9.94311	14.4362
3.17682	4.03398	5.11512	7.74329	6.02483	9.5919	9.94366	14.4363
3.15637	3.99891	5.11551	7.74342	3.92511	4.8222	9.9442	14.4363
3.17712	4.03474	5.1159	7.74356	6.0272	9.59206	9.94476	14.4356
3.15663	3.99966	5.11629	7.74367	3.92443	4.82542	9.94509	14.4367
3.17741	4.03549	5.11667	7.74383	6.02957	9.59219	9.94564	14.4367
3.15689	4.00042	5.11705	7.74397	3.92375	4.82861	9.94616	14.4361
3.1777	4.03624	5.11742	7.74409	6.03192	9.59235	9.94668	14.4371
3.15715	4.00116	5.1178	7.74425	3.92306	4.83179	9.94721	14.4363
3.17799	4.03699	5.11817	7.74437	6.0342	9.59251	9.94773	14.4373
3.15741	4.00191	5.11854	7.74453	3.92244	4.83496	9.94824	14.4367
3.17828	4.03773	5.11891	7.74466	6.0365	9.59266	9.94874	14.437
3.15766	4.00265	5.11927	7.74483	3.92176	4.8381	9.94925	14.4376
3.17856	4.03846	5.11964	7.745	6.03873	9.5928	9.94984	14.4375
3.15792	4.00338	5.12001	7.74517	3.92117	4.84125	9.95033	14.4377
3.17884	4.0392	5.12038	7.74533	6.04097	9.59292	9.95085	14.4379
3.15817	4.00411	5.12075	7.74549	3.92052	4.84444	9.95137	14.4381
3.17912	4.03992	5.12112	7.74565	6.04321	9.59307	9.95189	14.4383
3.15841	4.00483	5.12149	7.74582	3.91988	4.84751	9.95231	14.4388
3.17939	4.04063	5.12184	7.74598	6.04539	9.59322	9.95288	14.4392
3.15866	4.00555	5.12219	7.74615	3.9193	4.85056	9.95337	14.4394
3.17967	4.04134	5.12254	7.74631	6.04755	9.59339	9.95386	14.4391
3.1589	4.00625	5.12289	7.74646	3.91869	4.85361	9.95437	14.4392
3.17994	4.04205	5.12324	7.7466	6.04973	9.59354	9.95484	14.4399
3.15914	4.00695	5.12359	7.74677	3.91806	4.8566	9.95534	14.44
3.18021	4.04274	5.12393	7.74692	6.05186	9.59368	9.95581	14.4398
3.15938	4.00765	5.12428	7.74707	3.91748	4.8596	9.9563	14.44
3.18047	4.04344	5.12462	7.74722	6.05397	9.59382	9.95677	14.4401
3.15962	4.00835	5.12496	7.74736	3.9169	4.86258	9.95725	14.44
3.18074	4.04413	5.1253	7.74747	6.05606	9.59396	9.95775	14.4402
3.15986	4.00904	5.12564	7.74757	3.91632	4.86554	9.95823	14.4403
3.181	4.04482	5.12598	7.74769	6.05814	9.59416	9.9585	14.4413
3.16009	4.00972	5.12631	7.74784	3.91574	4.86848	9.95897	14.4404
3.18126	4.0455	5.12663	7.74796	6.06021	9.59429	9.95943	14.4408
3.16032	4.0104	5.12696	7.74807	3.91517	4.8714	9.95989	14.4408
3.18152	4.04617	5.12728	7.74818	6.06226	9.59444	9.96033	14.4409
3.16055	4.01107	5.12761	7.74828	3.91457	4.87429	9.96083	14.441
3.18177	4.04684	5.12794	7.74838	6.06431	9.59458	9.96122	14.4411
3.16078	4.01174	5.12826	7.74849	3.914	4.87717	9.96168	14.4412
3.18202	4.04751	5.12858	7.74863	6.06629	9.59472	9.96216	14.4415
3.16101	4.0124	5.1289	7.74881	3.91349	4.88004	9.9626	14.4429
3.18228	4.04817	5.12921	7.74899	6.06829	9.59492	9.96304	14.4429
3.16123	4.01306	5.12953	7.74915	3.91291	4.88287	9.9636	14.4432
3.18252	4.04882	5.12985	7.74929	6.07025	9.59506	9.964	14.4419
3.16145	4.01371	5.13018	7.74939	3.91238	4.88568	9.96446	14.443
3.18277	4.04947	5.1305	7.74952	6.07223	9.5952	9.96492	14.4434
3.16167	4.01436	5.13083	7.74967	3.91181	4.88848	9.9654	14.4435
3.18301	4.05011	5.13114	7.74981	6.07416	9.59534	9.96586	14.4438
3.16189	4.015	5.13144	7.74994	3.9113	4.89126	9.96626	14.4439
3.18326	4.05075	5.13174	7.75008	6.07606	9.59548	9.96653	14.444
3.16211	4.01564	5.13205	7.75021	3.91078	4.89403	9.96726	14.4442

## Sheet: A21
1.67895	1.67895	1.67895	1.67895	2.61218	2.6332	2.66614	2.83936
1.50039	1.55479	1.61677	1.78529	0.979569	1.07801	1.19411	1.51419
1.49623	1.57587	1.65396	1.83312	1.13939	1.3206	1.50784	1.98687
1.49533	1.58856	1.67647	1.87247	1.09256	1.29821	1.49882	1.97112
1.50219	1.60587	1.70238	1.9133	1.11555	1.34733	1.57094	2.09515
1.50892	1.622	1.7268	1.95308	1.12994	1.38273	1.62542	2.1858
1.51565	1.63778	1.75077	1.99244	1.1462	1.41974	1.6821	2.28342
1.52215	1.65309	1.77417	2.03133	1.16169	1.45546	1.73729	2.37938
1.52845	1.66799	1.79709	2.06985	1.1768	1.49049	1.79173	2.47565
1.53457	1.68254	1.81956	2.10804	1.19152	1.52482	1.84541	2.572
1.54054	1.69676	1.84162	2.14593	1.20592	1.55852	1.89839	2.66865
1.54638	1.71068	1.8633	2.18356	1.22004	1.59163	1.95073	2.76569
1.55212	1.72432	1.88464	2.22095	1.23391	1.62451	2.00246	2.86328
1.55775	1.73772	1.90563	2.25813	1.24756	1.65642	2.05361	2.96153
1.5633	1.75087	1.92631	2.29513	1.26104	1.68806	2.10422	3.0606
1.56876	1.7638	1.94669	2.33195	1.27429	1.71921	2.15431	3.16062
1.57415	1.7765	1.96678	2.36863	1.28739	1.74992	2.20392	3.26166
1.57947	1.78899	1.98658	2.40517	1.30033	1.7802	2.25305	3.36385
1.58473	1.80128	2.00612	2.44161	1.31312	1.81007	2.30173	3.46736
1.58992	1.81338	2.0254	2.47795	1.32577	1.83955	2.34999	3.57221
1.59506	1.82529	2.04443	2.51421	1.33827	1.86864	2.39784	3.67845
1.60014	1.83703	2.06321	2.55042	1.35065	1.89736	2.4453	3.78619
1.60516	1.84858	2.08176	2.58657	1.36289	1.92572	2.49207	3.89533
1.61013	1.85997	2.10008	2.6227	1.37502	1.95373	2.53895	4.00611
1.61505	1.8712	2.11817	2.6588	1.38702	1.9814	2.58531	4.11802
1.61993	1.88227	2.13605	2.6949	1.3989	2.00876	2.63139	4.23147
1.62475	1.89318	2.15372	2.73099	1.41067	2.03577	2.67716	4.34612
1.62953	1.90395	2.17119	2.76709	1.42234	2.06248	2.72267	4.46189
1.63426	1.91458	2.18846	2.80319	1.43389	2.08889	2.76791	4.57894
1.63895	1.92506	2.20554	2.83931	1.44533	2.115	2.8129	4.69674
1.6436	1.9354	2.22244	2.87544	1.45668	2.14082	2.85767	4.81562
1.6482	1.94562	2.23916	2.91159	1.46792	2.16637	2.90224	4.93521
1.65277	1.9557	2.2557	2.94775	1.47906	2.19164	2.94659	5.05538
1.65729	1.96566	2.27208	2.9839	1.49011	2.21664	2.99071	5.17614
1.66178	1.97549	2.28828	3.02006	1.50106	2.24139	3.03476	5.2975
1.66623	1.98521	2.30433	3.05621	1.51192	2.26588	3.07859	5.41884
1.67064	1.99481	2.32022	3.09235	1.52268	2.29013	3.12228	5.54066
1.67501	2.0043	2.33596	3.12846	1.53336	2.31414	3.16587	5.66257
1.67935	2.01367	2.35155	3.16452	1.54395	2.33791	3.20929	5.78407
1.68365	2.02294	2.36699	3.20054	1.55445	2.36146	3.25264	5.90619
1.68792	2.0321	2.3823	3.2365	1.56487	2.38479	3.29584	6.02772
1.69216	2.04116	2.39746	3.27238	1.57521	2.40789	3.33896	6.14882
1.69636	2.05012	2.4125	3.30817	1.58547	2.4308	3.38197	6.26964
1.70053	2.05898	2.4274	3.34386	1.59565	2.45317	3.42494	6.39028
1.70467	2.06774	2.44217	3.37943	1.60575	2.4758	3.46775	6.50954
1.70878	2.0764	2.45682	3.41489	1.61577	2.49805	3.51056	6.62968
1.71286	2.08497	2.47134	3.45018	1.62544	2.52013	3.55324	6.74721
1.7169	2.09345	2.48575	3.48532	1.63546	2.54202	3.59585	6.86565
1.7209	2.10184	2.50003	3.52029	1.64521	2.56374	3.63837	6.98181
1.72488	2.11015	2.5142	3.55507	1.65491	2.58529	3.6808	7.09769
1.72883	2.11837	2.52826	3.58966	1.66455	2.60664	3.72319	7.21316
1.73275	2.12652	2.5422	3.62403	1.67412	2.62785	3.76546	7.32639
1.73665	2.13458	2.55603	3.65817	1.68362	2.64889	3.80765	7.43916
1.74052	2.14256	2.56976	3.69208	1.69306	2.66976	3.84978	7.55138
1.74436	2.15047	2.58337	3.72577	1.70243	2.69049	3.89186	7.66115
1.74818	2.1583	2.59688	3.7592	1.71174	2.71105	3.9337	7.76988
1.75197	2.16606	2.61029	3.79234	1.721	2.73149	3.97552	7.87902
1.75574	2.17374	2.62358	3.82523	1.73019	2.75176	4.01721	7.98445
1.75948	2.18135	2.63678	3.85784	1.73932	2.77191	4.05876	8.09043
1.76321	2.1889	2.64987	3.89016	1.7484	2.7919	4.10018	8.19287
1.7669	2.19637	2.66286	3.92216	1.75742	2.81178	4.14148	8.29671
1.77058	2.20378	2.67575	3.95387	1.76639	2.83152	4.18262	8.39689
1.77423	2.21113	2.68854	3.98528	1.7753	2.85114	4.22368	8.49696
1.77786	2.21841	2.70123	4.01639	1.78416	2.87062	4.26448	8.59467
1.78147	2.22563	2.71382	4.04717	1.79297	2.89	4.3052	8.69064
1.78506	2.23278	2.72631	4.07764	1.80173	2.90924	4.34571	8.78671
1.78863	2.23988	2.7387	4.10778	1.81043	2.9284	4.38602	8.87972
1.79218	2.24692	2.75099	4.13762	1.81909	2.94739	4.42616	8.97271
1.79571	2.2539	2.76319	4.16714	1.82771	2.96632	4.46615	9.06279
1.79922	2.26082	2.77528	4.19635	1.83627	2.98514	4.5059	9.15163
1.80271	2.26769	2.78728	4.22523	1.8448	3.00387	4.54542	9.23961
1.80618	2.2745	2.79919	4.2538	1.85326	3.02249	4.58471	9.32558
1.80963	2.28126	2.811	4.28206	1.8617	3.04099	4.6239	9.4099
1.81306	2.28796	2.82271	4.31001	1.87009	3.05942	4.66281	9.49338
1.81648	2.29462	2.83432	4.33764	1.87843	3.07774	4.70149	9.57396
1.81988	2.30122	2.84584	4.36498	1.88674	3.09594	4.73997	9.65394
1.82326	2.30778	2.85727	4.392	1.89501	3.11411	4.77819	9.7315
1.82663	2.31428	2.8686	4.41872	1.90323	3.13217	4.8162	9.80774
1.82997	2.32074	2.87983	4.44515	1.91142	3.15014	4.85392	9.88132
1.83331	2.32715	2.89097	4.47128	1.91957	3.16802	4.89137	9.95431
1.83662	2.33351	2.90201	4.49712	1.92768	3.18583	4.92865	10.0242
1.83992	2.33983	2.91296	4.52268	1.93576	3.20357	4.96556	10.0925
1.84321	2.34611	2.92382	4.54798	1.9438	3.22122	5.00234	10.1581
1.84648	2.35234	2.93458	4.57301	1.95181	3.2388	5.03876	10.2212
1.84973	2.35852	2.94525	4.59779	1.95978	3.25632	5.07496	10.2813
1.85298	2.36467	2.95583	4.62232	1.96772	3.27374	5.11092	10.3381
1.8562	2.37077	2.96631	4.6466	1.97562	3.29111	5.14652	10.3914
1.85941	2.37684	2.97671	4.67067	1.9835	3.30842	5.18196	10.4401
1.86261	2.38286	2.98701	4.69453	1.99134	3.32563	5.21703	10.4841
1.8658	2.38885	2.99722	4.71822	1.99916	3.34282	5.2519	10.5226
1.86897	2.39479	3.00734	4.74174	2.00694	3.35989	5.28645	10.5559
1.87213	2.4007	3.01738	4.76511	2.01469	3.37695	5.3208	10.5844
1.87528	2.40657	3.02732	4.78831	2.02242	3.39394	5.3548	10.6093
1.87841	2.41241	3.03717	4.81136	2.03011	3.41083	5.39576	10.6336
1.88153	2.41821	3.04696	4.83426	2.03778	3.42771	5.42108	10.6602
1.88464	2.42397	3.05666	4.85707	2.04542	3.4445	5.46101	10.6895
1.88774	2.4297	3.06627	4.87978	2.05304	3.46125	5.48862	10.7198
1.89082	2.43539	3.0758	4.90235	2.06063	3.47792	5.52586	10.7505
1.8939	2.44105	3.08523	4.92475	2.06819	3.49457	5.55459	10.7831
1.89696	2.44668	3.09459	4.947	2.07573	3.51116	5.58996	10.8158
1.90001	2.45228	3.10385	4.96907	2.08325	3.52765	5.61919	10.8496
1.90305	2.45784	3.11304	4.99097	2.09074	3.54417	5.65318	10.8833
1.90608	2.46337	3.12214	5.01268	2.09821	3.56056	5.68252	10.917
1.9091	2.46887	3.13116	5.0342	2.10565	3.57693	5.71596	10.9518
1.91211	2.47434	3.1401	5.05556	2.11308	3.59327	5.7446	10.9883
1.91511	2.47978	3.14896	5.07674	2.12048	3.60954	5.77722	11.021
1.9181	2.48519	3.15774	5.09766	2.12785	3.62577	5.80571	11.0554
1.92107	2.49056	3.16644	5.11842	2.13521	3.64184	5.83745	11.0898
1.92404	2.49591	3.17506	5.13901	2.14255	3.65802	5.86573	11.1234
1.927	2.50123	3.18361	5.15937	2.14987	3.67408	5.89674	11.1568
1.92995	2.50653	3.19208	5.17954	2.15716	3.69011	5.92468	11.1906
1.93289	2.51179	3.20047	5.19954	2.16444	3.7061	5.95506	11.2236
1.93582	2.51703	3.20879	5.21932	2.1717	3.72204	5.98254	11.2573
1.93874	2.52224	3.21703	5.23895	2.17894	3.73794	6.01237	11.2904
1.94166	2.52742	3.2252	5.25835	2.18616	3.75378	6.03945	11.3234
1.94456	2.53258	3.2333	5.27765	2.19336	3.76958	6.06867	11.3574
1.94746	2.53771	3.24132	5.29678	2.20054	3.78535	6.09537	11.3893
1.95034	2.54281	3.24928	5.31569	2.20771	3.80105	6.12401	11.4198
1.95322	2.54789	3.25716	5.33436	2.21486	3.81671	6.15032	11.4513
1.95609	2.55294	3.26497	5.35279	2.22199	3.83246	6.17839	11.4833
1.95895	2.55797	3.27272	5.37109	2.22911	3.84798	6.20429	11.5144
1.96181	2.56298	3.28039	5.38919	2.2362	3.86352	6.23192	11.5471
1.96465	2.56795	3.288	5.40722	2.24329	3.87901	6.25726	11.5772
1.96749	2.57291	3.29555	5.42502	2.25036	3.89449	6.28454	11.6074
1.97032	2.57784	3.30302	5.4426	2.25741	3.90986	6.30935	11.6377
1.97314	2.58274	3.31043	5.45998	2.26445	3.92523	6.33622	11.6679
1.97596	2.58762	3.31778	5.47719	2.27147	3.94056	6.36056	11.6985
1.97877	2.59248	3.32506	5.49429	2.27847	3.95583	6.38704	11.7288
1.98157	2.59732	3.33228	5.51123	2.28546	3.97106	6.41085	11.7572
1.98436	2.60213	3.33944	5.52793	2.29244	3.98625	6.43702	11.7862
1.98714	2.60692	3.34653	5.54445	2.2994	4.00139	6.46025	11.8152
1.98992	2.61168	3.35357	5.56078	2.30635	4.0165	6.48622	11.8443
1.99269	2.61643	3.36055	5.57697	2.31329	4.03154	6.50876	11.8721
1.99546	2.62115	3.36747	5.59296	2.32021	4.04656	6.53459	11.9005
1.99821	2.62585	3.37432	5.60878	2.32712	4.06153	6.55645	11.9288
2.00096	2.63052	3.38112	5.62446	2.33402	4.07644	6.58219	11.9562
2.00371	2.63518	3.38786	5.63994	2.3409	4.09135	6.60328	11.9838
2.00644	2.63981	3.39455	5.65522	2.34777	4.10616	6.62902	12.0115
2.00917	2.64442	3.40118	5.67043	2.35463	4.12095	6.64929	12.0385
2.01189	2.64901	3.40776	5.68546	2.36147	4.13571	6.67515	12.065
2.01461	2.65358	3.41427	5.70031	2.3683	4.15042	6.69444	12.0912
2.01732	2.65813	3.42075	5.71497	2.37512	4.16506	6.72059	12.1195
2.02002	2.66266	3.42715	5.72957	2.38193	4.17971	6.73876	12.144
2.02272	2.66716	3.43352	5.74392	2.38873	4.19423	6.7654	12.1716
2.02541	2.67165	3.43982	5.75822	2.39552	4.2088	6.78221	12.1965
2.02809	2.67611	3.44609	5.77235	2.40229	4.22326	6.80966	12.2214
2.03077	2.68055	3.45228	5.78628	2.40905	4.2377	6.82474	12.2465
2.03344	2.68498	3.45846	5.80004	2.4158	4.2521	6.85342	12.2713
2.03611	2.68938	3.46454	5.81364	2.42254	4.26642	6.86631	12.2964
2.03877	2.69376	3.47063	5.82708	2.42927	4.28077	6.89678	12.3218
2.04142	2.69813	3.47661	5.84048	2.43599	4.29497	6.90696	12.3452
2.04407	2.70247	3.4826	5.85365	2.44269	4.3092	6.93973	12.3697
2.04671	2.70679	3.48848	5.86671	2.44939	4.32338	6.94647	12.393
2.04934	2.7111	3.49439	5.87962	2.45608	4.33746	6.98254	12.4167
2.05197	2.71538	3.50016	5.89239	2.46275	4.35155	6.98474	12.4404
2.05459	2.71965	3.50599	5.90504	2.46941	4.36559	7.02542	12.4646
2.05721	2.72389	3.51166	5.91761	2.47607	4.37954	7.02154	12.4867
2.05982	2.72812	3.51742	5.92996	2.48272	4.3935	7.06864	12.5097
2.06242	2.73233	3.52298	5.94218	2.48934	4.40737	7.05657	12.5326
2.06502	2.73651	3.52868	5.95423	2.49597	4.42123	7.11256	12.5555
2.06762	2.74068	3.53412	5.96625	2.50258	4.43502	7.08942	12.5775
2.07021	2.74483	3.53977	5.97809	2.50919	4.44874	7.15775	12.5995
2.07279	2.74896	3.54508	5.9898	2.51578	4.46247	7.11948	12.6214
2.07536	2.75308	3.5507	6.00138	2.52237	4.47609	7.2049	12.643
2.07794	2.75717	3.55587	6.01283	2.52895	4.48973	7.14589	12.6644
2.0805	2.76125	3.56147	6.02416	2.53551	4.50326	7.25512	12.6857
2.08306	2.7653	3.56648	6.03536	2.54207	4.51678	7.16739	12.7067
2.08561	2.76934	3.5721	6.04645	2.54862	4.53025	7.30984	12.7277
2.08816	2.77336	3.57692	6.05743	2.55515	4.54367	7.18227	12.7485
2.0907	2.77737	3.58259	6.0683	2.56168	4.55703	7.37109	12.7693
2.09324	2.78135	3.58717	6.07904	2.5682	4.57038	7.18811	12.7895
2.09577	2.78532	3.59296	6.08969	2.5747	4.58361	7.44187	12.8101
2.0983	2.78926	3.59727	6.10025	2.5812	4.59688	7.18168	12.8308
2.10082	2.79319	3.60325	6.11072	2.58769	4.61004	7.52578	12.8498
2.10333	2.79711	3.60716	6.12107	2.59417	4.62318	7.15788	12.8688
2.10584	2.801	3.61343	6.13123	2.60065	4.63626	7.62842	12.8891
2.10834	2.80488	3.61683	6.14136	2.60711	4.64928	7.11007	12.907
2.11084	2.80874	3.62353	6.15129	2.61356	4.66231	7.75683	12.9284
2.11333	2.81258	3.62623	6.16121	2.62001	4.67522	7.02949	12.9449
2.11582	2.81641	3.63355	6.17095	2.62644	4.68813	7.91887	12.966
2.1183	2.82021	3.63529	6.1808	2.63287	4.70094	6.90633	12.9836
2.12078	2.824	3.64346	6.1905	2.63928	4.71377	8.12311	12.9997
2.12325	2.82778	3.64395	6.19989	2.64569	4.72648	6.7313	13.018
2.12571	2.83153	3.6532	6.20923	2.6521	4.73921	8.37231	13.0388
2.12817	2.83527	3.65214	6.21855	2.65848	4.75187	6.50452	13.0557
2.13062	2.83899	3.66261	6.2277	2.66487	4.76443	8.65406	13.0736
2.13307	2.8427	3.65981	6.23676	2.67124	4.77706	6.24759	13.0906
2.13551	2.84639	3.67142	6.24569	2.6776	4.78951	8.93234	13.1093
2.13795	2.85006	3.66702	6.25461	2.68395	4.80201	6.00984	13.1259
2.14038	2.85371	3.67946	6.26343	2.6903	4.81442	9.15751	13.1429
2.14281	2.85735	3.67397	6.27215	2.69664	4.82676	5.84135	13.1597
2.14523	2.86097	3.68688	6.28077	2.70296	4.8391	9.30506	13.1759
2.14764	2.86458	3.68088	6.28927	2.70929	4.85137	5.75417	13.1931
2.15005	2.86817	3.69406	6.29773	2.71559	4.8636	9.39035	13.2068
2.15245	2.87174	3.68786	6.30597	2.7219	4.87575	5.72433	13.223
2.15485	2.8753	3.7012	6.31414	2.72819	4.88793	9.44085	13.241
2.15725	2.87884	3.69488	6.32236	2.73447	4.89994	5.72429	13.2549
2.15963	2.88237	3.70835	6.3304	2.74075	4.91205	9.47516	13.2704
2.16202	2.88588	3.70193	6.33835	2.74702	4.92397	5.73779	13.2858
2.16439	2.88937	3.7155	6.34621	2.75326	4.93597	9.50218	13.3011
2.16676	2.89285	3.70898	6.35395	2.75951	4.94784	5.75745	13.3162
2.16913	2.89631	3.72265	6.3616	2.76575	4.95966	9.52552	13.3311
2.17149	2.89976	3.71603	6.36919	2.77199	4.97149	5.78032	13.3478
2.17384	2.90319	3.7298	6.3768	2.7782	4.98322	9.54665	13.3632
2.17619	2.9066	3.72308	6.38437	2.78442	4.99496	5.8053	13.3778
2.17853	2.91	3.73693	6.39188	2.79063	5.00656	9.56665	13.3924
2.18087	2.91339	3.73014	6.39927	2.79682	5.01824	5.8312	13.4062
2.18321	2.91675	3.74407	6.40658	2.80301	5.02972	9.58493	13.4203
2.18553	2.92011	3.7372	6.41379	2.80918	5.04133	5.85926	13.4363
2.18785	2.92345	3.7512	6.42105	2.81536	5.05272	9.60162	13.4504
2.19017	2.92677	3.74425	6.42823	2.82152	5.06422	5.88899	13.4608
2.19248	2.93008	3.75832	6.43517	2.82766	5.07552	9.61697	13.4746
2.19479	2.93337	3.7513	6.44203	2.83381	5.08692	5.92017	13.488
2.19708	2.93665	3.76544	6.44883	2.83994	5.09815	9.63109	13.5012
2.19938	2.93992	3.75835	6.45556	2.84607	5.10946	5.95278	13.5144
2.20167	2.94316	3.77255	6.46222	2.85217	5.12055	9.64405	13.5274
2.20395	2.9464	3.7654	6.46882	2.85829	5.13181	5.98671	13.5402
2.20623	2.94962	3.77965	6.47537	2.8644	5.14282	9.65593	13.553
2.2085	2.95282	3.77244	6.48184	2.87049	5.15396	6.02192	13.5656
2.21076	2.95601	3.78673	6.48826	2.87656	5.1649	9.66677	13.5781
2.21302	2.95919	3.77948	6.49462	2.88264	5.1759	6.05837	13.5905
2.21528	2.96235	3.79381	6.50091	2.88869	5.18683	9.67666	13.6028
2.21753	2.9655	3.78652	6.50715	2.89474	5.19767	6.09601	13.615
2.21977	2.96863	3.80087	6.51333	2.90078	5.20853	9.68559	13.627
2.22201	2.97175	3.79354	6.51946	2.90681	5.21927	6.13478	13.6394
2.22424	2.97486	3.80792	6.52559	2.91284	5.23008	9.69378	13.6512
2.22646	2.97795	3.80056	6.53178	2.91885	5.2407	6.17445	13.6633
2.22868	2.98103	3.81495	6.53792	2.92484	5.25143	9.7011	13.6753
2.2309	2.98409	3.80756	6.54401	2.93084	5.26195	6.21524	13.6872
2.23311	2.98714	3.82195	6.55007	2.93682	5.27261	9.70762	13.699
2.23531	2.99018	3.81455	6.55607	2.9428	5.28304	6.25694	13.7107
2.23751	2.9932	3.82894	6.56201	2.94876	5.29359	9.71343	13.7224
2.2397	2.99621	3.82152	6.56788	2.95471	5.30396	6.29952	13.7335
2.24188	2.99921	3.83589	6.57355	2.96067	5.31437	9.71859	13.7471
2.24406	3.00219	3.82848	6.57925	2.96659	5.32474	6.34285	13.758
2.24624	3.00516	3.84282	6.58491	2.97253	5.33498	9.72313	13.7689
2.24841	3.00811	3.83541	6.59051	2.97843	5.34529	6.3869	13.7801
2.25057	3.01105	3.84972	6.59606	2.98436	5.35546	9.7271	13.7905
2.25273	3.01398	3.84231	6.60154	2.99024	5.36566	6.43156	13.8012
2.25488	3.0169	3.85658	6.60696	2.99614	5.37578	9.73055	13.8096
2.25702	3.0198	3.84919	6.61224	3.00201	5.38586	6.47677	13.8198
2.25917	3.02269	3.8634	6.61744	3.00789	5.39591	9.73352	13.8303
2.2613	3.02557	3.85603	6.62261	3.01375	5.40589	6.52248	13.8408
2.26343	3.02843	3.87019	6.62772	3.01956	5.41585	9.73601	13.8495
2.26555	3.03128	3.86284	6.63281	3.02541	5.42577	6.56863	13.8597
2.26767	3.03412	3.87693	6.63782	3.03129	5.43566	9.73809	13.8694
2.26978	3.03694	3.86962	6.64279	3.03707	5.44545	6.61513	13.8789
2.27189	3.03975	3.88362	6.64771	3.0429	5.45529	9.73975	13.8884
2.27399	3.04255	3.87636	6.6526	3.04868	5.465	6.66196	13.8978
2.27608	3.04534	3.89027	6.65744	3.05446	5.47472	9.74104	13.9072
2.27817	3.04812	3.88305	6.66225	3.06025	5.4844	6.70904	13.9164
2.28026	3.05088	3.89687	6.66701	3.06605	5.49395	9.74196	13.9256
2.28233	3.05363	3.8897	6.67175	3.07176	5.50365	6.75631	13.9347
2.2844	3.05636	3.90342	6.67643	3.07753	5.51306	9.74257	13.9437
2.28647	3.05909	3.89631	6.68109	3.08326	5.52268	6.80374	13.9526
2.28853	3.0618	3.90991	6.6857	3.089	5.532	9.74284	13.9615
2.29059	3.0645	3.90287	6.69028	3.09472	5.54158	6.85129	13.9702
2.29263	3.06719	3.91636	6.69482	3.10043	5.55081	9.74282	13.9789
2.29468	3.06987	3.90938	6.69932	3.10617	5.56028	6.89889	13.988
2.29671	3.07253	3.92274	6.70383	3.11182	5.56943	9.74252	13.9966
2.29875	3.07519	3.91584	6.70831	3.11752	5.57886	6.94657	14.0052
2.30077	3.07783	3.92907	6.71275	3.12319	5.58789	9.74191	14.0144
2.30279	3.08046	3.92224	6.71716	3.12882	5.59729	6.99424	14.0225
2.3048	3.08307	3.93534	6.72154	3.13451	5.60616	9.74105	14.0309
2.30681	3.08568	3.9286	6.72588	3.14005	5.61553	7.0419	14.0393
2.30881	3.08827	3.94155	6.73019	3.14577	5.62432	9.73991	14.0473
2.31081	3.09086	3.9349	6.73447	3.15135	5.63365	7.08942	14.0545
2.3128	3.09342	3.94771	6.7387	3.15696	5.64228	9.73856	14.0629
2.31478	3.09599	3.94114	6.74289	3.16254	5.65161	7.13691	14.0709
2.31676	3.09853	3.9538	6.74705	3.16813	5.6601	9.73693	14.0788
2.31874	3.10107	3.94733	6.75117	3.17369	5.66942	7.18436	14.0866
2.3207	3.10359	3.95983	6.75527	3.17925	5.67774	9.73502	14.0942
2.32266	3.10611	3.95345	6.75933	3.18481	5.68708	7.23168	14.1028
2.32462	3.10861	3.9658	6.76333	3.19032	5.69524	9.73289	14.1097
2.32657	3.1111	3.95953	6.76738	3.19587	5.7046	7.27888	14.1177
2.32851	3.11358	3.9717	6.77139	3.20137	5.71254	9.73051	14.1252
2.33045	3.11605	3.96554	6.77539	3.20687	5.72201	7.32592	14.1328
2.33238	3.11851	3.97755	6.77935	3.21237	5.72969	9.72789	14.1403
2.3343	3.12096	3.9715	6.78329	3.21785	5.73926	7.37282	14.1477
2.33622	3.12339	3.98333	6.78721	3.22329	5.74668	9.72503	14.155
2.33814	3.12582	3.97739	6.79109	3.22877	5.7564	7.41955	14.1632
2.34004	3.12823	3.98905	6.79492	3.23422	5.76348	9.72194	14.1699
2.34195	3.13064	3.98323	6.79872	3.23964	5.77344	7.46614	14.1764
2.34384	3.13302	3.99471	6.80251	3.24504	5.78002	9.71857	14.1838
2.34573	3.13541	3.98901	6.80627	3.25048	5.79043	7.51227	14.1907
2.34761	3.13777	4.00033	6.80998	3.25586	5.79637	9.71526	14.1981
2.34949	3.14015	3.99476	6.81373	3.26124	5.80731	7.55841	14.2069
2.35137	3.14248	4.00589	6.81751	3.26664	5.81253	9.71154	14.2119
2.35323	3.14484	4.00044	6.82117	3.27197	5.82411	7.60458	14.2188
2.35509	3.14715	4.01139	6.8248	3.27734	5.82848	9.70747	14.2256
2.35694	3.14949	4.00607	6.8284	3.28267	5.84087	7.65056	14.2323
2.35879	3.15177	4.01683	6.83198	3.28799	5.84413	9.70316	14.239
2.36063	3.1541	4.01164	6.83553	3.29331	5.85768	7.69639	14.2458
2.36247	3.15635	4.0222	6.83906	3.29853	5.85942	9.69853	14.2524
2.3643	3.15867	4.01715	6.84257	3.30391	5.87462	7.74204	14.2591
2.36612	3.16089	4.02751	6.84604	3.30909	5.87426	9.69332	14.2655
2.36794	3.1632	4.02258	6.84949	3.31447	5.89173	7.78816	14.2725
2.36975	3.16539	4.03274	6.85293	3.31966	5.88858	9.68775	14.2779
2.37156	3.16769	4.02796	6.85635	3.3249	5.90919	7.83373	14.2847
2.37336	3.16984	4.03791	6.85977	3.33015	5.90224	9.68204	14.2908
2.37515	3.17215	4.03327	6.86327	3.33535	5.9271	7.87895	14.2974
2.37694	3.17425	4.04302	6.86677	3.34056	5.91498	9.67617	14.3039
2.37872	3.17657	4.03853	6.87024	3.34573	5.94584	7.92393	14.3104
2.3805	3.17862	4.04807	6.87368	3.35093	5.92649	9.67004	14.3171
2.38227	3.18095	4.04373	6.87713	3.35606	5.9657	7.96878	14.3234
2.38403	3.18294	4.05306	6.88061	3.36124	5.93636	9.66357	14.3307
2.38579	3.18531	4.04888	6.88395	3.36636	5.9872	8.01344	14.3357
2.38754	3.18721	4.058	6.88728	3.37147	5.94399	9.65681	14.3422
2.38929	3.18964	4.05397	6.89058	3.3766	6.01117	8.05796	14.3483
2.39103	3.19142	4.06287	6.89385	3.38168	5.94833	9.64973	14.3542
2.39276	3.19396	4.059	6.89709	3.38679	6.03874	8.10239	14.3602
2.39449	3.19557	4.06769	6.90034	3.39185	5.9481	9.6423	14.3662
2.39621	3.19825	4.06398	6.90357	3.3969	6.07146	8.14665	14.3722
2.39793	3.19966	4.07246	6.90677	3.40194	5.94138	9.6346	14.3781
2.39964	3.20255	4.06891	6.90995	3.40699	6.11174	8.19079	14.384
2.40134	3.20365	4.07717	6.913	3.412	5.92526	9.62654	14.3897
2.40304	3.20686	4.07379	6.91601	3.417	6.16299	8.23489	14.3951
2.40473	3.20753	4.08182	6.91911	3.422	5.89562	9.61807	14.4016
2.40642	3.21121	4.07862	6.92206	3.42699	6.23005	8.27889	14.4064
2.40809	3.21127	4.08643	6.92502	3.43194	5.8467	9.60923	14.4114
2.40977	3.21561	4.08339	6.92807	3.4369	6.31985	8.32283	14.4172
2.41144	3.21481	4.09098	6.93115	3.44183	5.77028	9.60001	14.4228
2.4131	3.2201	4.08812	6.93422	3.44676	6.44164	8.36672	14.4284
2.41475	3.21807	4.09547	6.93728	3.45166	5.656	9.59037	14.436
2.4164	3.22469	4.09279	6.94024	3.45658	6.60615	8.41053	14.4408
2.41805	3.22094	4.09992	6.94311	3.46148	5.49347	9.5804	14.4467
2.41969	3.22935	4.09742	6.94601	3.46633	6.82114	8.45425	14.4513
2.42132	3.2233	4.10431	6.94885	3.47122	5.27954	9.57004	14.4572
2.42294	3.23391	4.10201	6.95173	3.47601	7.08059	8.49786	14.4616
2.42456	3.22509	4.10866	6.95454	3.48088	5.0323	9.55931	14.4676
2.42618	3.23805	4.10654	6.95739	3.4857	7.34949	8.5414	14.4719
2.42778	3.22644	4.11295	6.96019	3.49047	4.79862	9.54816	14.4779
2.42939	3.24143	4.11102	6.963	3.49526	7.57036	8.58486	14.4821
2.43098	3.22771	4.1172	6.96575	3.50005	4.62819	9.53663	14.488
2.43257	3.24413	4.11546	6.96854	3.50479	7.71149	8.62821	14.4906
2.43416	3.22923	4.12139	6.9712	3.50955	4.5315	9.52476	14.4954
2.43573	3.24649	4.11986	6.97382	3.51427	7.78862	8.67137	14.5004
2.43731	3.23104	4.12554	6.97648	3.51899	4.48557	9.51264	14.505
2.43887	3.24876	4.12421	6.97912	3.52367	7.83163	8.71429	14.5098
2.44043	3.23303	4.12965	6.98172	3.52839	4.46485	9.50025	14.5143
2.44199	3.25102	4.12851	6.9843	3.53306	7.85994	8.75699	14.5188
2.44354	3.23512	4.1337	6.98684	3.53773	4.45471	9.48762	14.5236
2.44508	3.25328	4.13277	6.98943	3.54233	7.88247	8.79932	14.5281
2.44662	3.23724	4.13772	6.99199	3.54702	4.44869	9.47488	14.5324
2.44815	3.25555	4.13698	6.9947	3.55161	7.90276	8.84116	14.5379
2.44967	3.23939	4.14168	6.99735	3.55619	4.44426	9.46216	14.5425
2.45119	3.25782	4.14115	6.99997	3.56081	7.92203	8.88245	14.5465
2.4527	3.24155	4.14561	7.0026	3.56537	4.44064	9.44955	14.5515
2.45421	3.26011	4.14528	7.00521	3.56993	7.94089	8.92303	14.5562
2.45571	3.24372	4.1495	7.0078	3.57448	4.43734	9.43714	14.5607
2.45721	3.2624	4.14937	7.01037	3.579	7.9595	8.96276	14.5656
2.4587	3.2459	4.15335	7.0129	3.58353	4.43425	9.42515	14.5704
2.46018	3.26469	4.15341	7.01542	3.58803	7.97785	9.00144	14.574
2.46166	3.24808	4.15715	7.01793	3.59251	4.43137	9.41376	14.5788
2.46313	3.26699	4.1574	7.02042	3.597	7.9961	9.03891	14.5832
2.4646	3.25027	4.16092	7.0229	3.60144	4.42859	9.40314	14.5876
2.46606	3.26929	4.16135	7.02536	3.6059	8.01411	9.07502	14.5919
2.46751	3.25246	4.16466	7.02781	3.61034	4.426	9.39348	14.5963
2.46896	3.27158	4.16526	7.03024	3.61472	8.03192	9.10958	14.6006
2.47041	3.25465	4.16836	7.03269	3.61915	4.42355	9.38494	14.6049
2.47184	3.27388	4.16912	7.03514	3.62354	8.04971	9.14244	14.6092
2.47328	3.25684	4.17204	7.03756	3.62789	4.42112	9.3777	14.6135
2.4747	3.27618	4.17294	7.03997	3.63226	8.06739	9.17363	14.6178
2.47612	3.25903	4.17568	7.04236	3.63662	4.41879	9.37178	14.622
2.47754	3.27848	4.17672	7.04475	3.64093	8.08491	9.20282	14.6262
2.47895	3.26122	4.1793	7.04711	3.64524	4.41653	9.36753	14.6304
2.48035	3.28077	4.18046	7.04945	3.64956	8.10234	9.22991	14.6345
2.48175	3.2634	4.18289	7.05179	3.65383	4.41435	9.36495	14.6386
2.48314	3.28305	4.18416	7.0541	3.65811	8.1196	9.25492	14.6427
2.48453	3.26558	4.18645	7.05641	3.66236	4.41229	9.36414	14.6467
2.48591	3.28534	4.18781	7.0587	3.66659	8.13658	9.27785	14.6507
2.48728	3.26776	4.18999	7.06097	3.67085	4.41038	9.36497	14.6547
2.48865	3.28761	4.19143	7.06324	3.67505	8.1536	9.29883	14.6587
2.49002	3.26993	4.1935	7.06549	3.67923	4.40845	9.36737	14.6626
2.49138	3.28989	4.195	7.06773	3.68343	8.17054	9.318	14.6665
2.49273	3.2721	4.19698	7.06995	3.6876	4.40654	9.37129	14.6704
2.49408	3.29215	4.19853	7.07217	3.69175	8.18731	9.33544	14.6743
2.49542	3.27426	4.20044	7.07437	3.69591	4.40475	9.37646	14.6781
2.49675	3.29441	4.20203	7.07656	3.7	8.20395	9.35145	14.6819
2.49809	3.27641	4.20388	7.07873	3.70413	4.40302	9.38277	14.6857
2.49941	3.29666	4.20548	7.08089	3.70823	8.22045	9.36613	14.6894
2.50073	3.27856	4.20728	7.08304	3.71232	4.40135	9.39001	14.6932
2.50204	3.2989	4.20891	7.08518	3.71637	8.23683	9.37974	14.6968
2.50335	3.2807	4.21066	7.0873	3.72043	4.39974	9.39799	14.7005
2.50466	3.30113	4.21229	7.0894	3.72447	8.25308	9.39248	14.7042
2.50595	3.28283	4.21402	7.0915	3.72848	4.39819	9.4065	14.7078
2.50725	3.30336	4.21565	7.09358	3.7325	8.2692	9.40447	14.7113
2.50853	3.28495	4.21734	7.09565	3.73651	4.3967	9.4155	14.7149
2.50981	3.30557	4.21897	7.09771	3.74047	8.28517	9.41588	14.7185
2.51109	3.28707	4.22064	7.0997	3.74443	4.39527	9.42478	14.722
2.51236	3.30778	4.22227	7.10172	3.74842	8.30099	9.4268	14.7254
2.51363	3.28918	4.22392	7.10373	3.75232	4.39398	9.43424	14.7289
2.51489	3.30998	4.22553	7.10573	3.75625	8.31672	9.43731	14.7323
2.51614	3.29128	4.22716	7.10772	3.76017	4.39267	9.44382	14.7357
2.51739	3.31217	4.22877	7.10969	3.76404	8.33229	9.44753	14.7391
2.51863	3.29337	4.23038	7.11166	3.76795	4.39144	9.45342	14.7423
2.51987	3.31435	4.23197	7.1136	3.77179	8.34775	9.45752	14.7456
2.52111	3.29546	4.23357	7.11553	3.77566	4.39025	9.463	14.7489
2.52233	3.31653	4.23515	7.11745	3.77947	8.36307	9.46732	14.7521
2.52356	3.29753	4.23673	7.11936	3.78332	4.3891	9.47252	14.7553
2.52477	3.31869	4.2383	7.12125	3.78711	8.37829	9.47695	14.7599
2.52599	3.29959	4.23986	7.12317	3.79091	4.38798	9.48195	14.762
2.52719	3.32083	4.24142	7.12508	3.79468	8.39335	9.48648	14.7652
2.5284	3.30165	4.24297	7.127	3.79846	4.38693	9.49126	14.7684
2.52959	3.32297	4.24451	7.12891	3.80219	8.40824	9.49585	14.7716
2.53079	3.30369	4.24605	7.13076	3.80596	4.38596	9.50054	14.7748
2.53197	3.3251	4.24758	7.1326	3.80963	8.42301	9.50506	14.7779
2.53315	3.30572	4.2491	7.13443	3.81339	4.38502	9.5097	14.7809
2.53433	3.32721	4.25062	7.13624	3.81704	8.43763	9.51418	14.784
2.5355	3.30774	4.25213	7.13805	3.82073	4.38412	9.51872	14.787
2.53667	3.32931	4.25363	7.13984	3.82441	8.45212	9.52321	14.79
2.53783	3.30974	4.25513	7.14163	3.82804	4.38327	9.52766	14.793
2.53898	3.3314	4.25662	7.1434	3.83169	8.46646	9.53207	14.7959
2.54013	3.31174	4.2581	7.14516	3.8353	4.38247	9.5365	14.7989
2.54128	3.33347	4.25958	7.14692	3.83894	8.48067	9.54085	14.8018
2.54242	3.31372	4.26105	7.14866	3.8425	4.3817	9.5452	14.8047
2.54355	3.33554	4.26252	7.1504	3.84608	8.49476	9.54953	14.8076
2.54469	3.3157	4.26398	7.15212	3.84966	4.38099	9.5538	14.8104
2.54581	3.33759	4.26544	7.15384	3.85322	8.50869	9.5581	14.8133
2.54693	3.31766	4.26688	7.15555	3.85674	4.38033	9.56231	14.8161
2.54805	3.33963	4.26833	7.15725	3.86027	8.52246	9.56652	14.8189
2.54916	3.31961	4.26976	7.15893	3.86377	4.37972	9.57073	14.8217
2.55026	3.34166	4.27119	7.16061	3.86729	8.5361	9.57487	14.8245
2.55136	3.32155	4.27262	7.16228	3.87074	4.37915	9.57899	14.8269
2.55246	3.34367	4.27404	7.16389	3.87424	8.54962	9.5831	14.8296
2.55355	3.32347	4.27545	7.16548	3.87767	4.37862	9.58718	14.8322
2.55464	3.34567	4.27686	7.16707	3.88113	8.56297	9.59124	14.8348
2.55572	3.3254	4.27826	7.16865	3.88456	4.3782	9.59525	14.8373
2.5568	3.34767	4.27966	7.17023	3.88794	8.57624	9.59924	14.841
2.55787	3.32731	4.28105	7.17182	3.89138	4.37776	9.60322	14.8432
2.55893	3.34965	4.28244	7.17342	3.89472	8.58936	9.60717	14.8457
2.56	3.3292	4.28382	7.17501	3.89813	4.37738	9.61108	14.8484
2.56106	3.35162	4.28519	7.17658	3.90147	8.60233	9.61497	14.8509
2.56211	3.33109	4.28656	7.17815	3.90482	4.37703	9.61884	14.8536
2.56316	3.35357	4.28793	7.1797	3.90814	8.61521	9.62267	14.856
2.5642	3.33296	4.28929	7.18124	3.91148	4.3767	9.62649	14.8585
2.56524	3.35552	4.29064	7.18277	3.91474	8.62798	9.63026	14.861
2.56627	3.33481	4.29199	7.1843	3.91807	4.37633	9.63404	14.8633
2.5673	3.35744	4.29333	7.18582	3.92134	8.64051	9.63775	14.8658
2.56833	3.33666	4.29467	7.18733	3.9246	4.37615	9.64145	14.8674
2.56935	3.35936	4.29601	7.18885	3.92784	8.65295	9.64513	14.8703
2.57036	3.3385	4.29734	7.19037	3.93109	4.37597	9.64878	14.8728
2.57137	3.36126	4.29866	7.19188	3.9343	8.66526	9.65242	14.8752
2.57238	3.34032	4.29998	7.19338	3.93753	4.3758	9.65601	14.8777
2.57338	3.36316	4.3013	7.19487	3.9407	8.67748	9.65957	14.8801
2.57438	3.34213	4.30261	7.19636	3.94389	4.37565	9.66312	14.8825
2.57537	3.36503	4.30391	7.19784	3.94707	8.68953	9.66664	14.8849
2.57636	3.34393	4.30522	7.19931	3.95022	4.37557	9.67014	14.8872
2.57734	3.3669	4.30651	7.20077	3.95337	8.70146	9.67358	14.8896
2.57832	3.34572	4.30781	7.20222	3.9565	4.37551	9.67703	14.8919
2.5793	3.36875	4.3091	7.20366	3.9596	8.71324	9.68044	14.8942
2.58027	3.3475	4.31038	7.2051	3.96273	4.3755	9.68381	14.8965
2.58123	3.37059	4.31166	7.20653	3.96581	8.72447	9.68718	14.8988
2.58219	3.34925	4.31294	7.20794	3.96889	4.3759	9.69049	14.9011
2.58315	3.37241	4.31421	7.20936	3.97195	8.73581	9.69381	14.9033
2.5841	3.351	4.31547	7.21076	3.975	4.37607	9.69706	14.9056
2.58505	3.37422	4.31674	7.21215	3.97804	8.74717	9.70032	14.9078
2.586	3.35274	4.318	7.21354	3.98107	4.37617	9.70351	14.91
2.58694	3.37602	4.31925	7.21492	3.98408	8.75843	9.70672	14.9122
2.58787	3.35446	4.32051	7.21629	3.98709	4.3763	9.70987	14.9144
2.5888	3.37781	4.32175	7.21765	3.99009	8.76954	9.713	14.9165
2.58973	3.35618	4.323	7.21901	3.99303	4.37645	9.71609	14.9187
2.59065	3.37958	4.32424	7.22035	3.99602	8.78056	9.71917	14.9217
2.59157	3.35788	4.32548	7.22167	3.99895	4.37664	9.72221	14.9225
2.59248	3.38134	4.32671	7.22297	4.00189	8.79143	9.72523	14.9249
2.59339	3.35957	4.32794	7.22425	4.00484	4.37687	9.7282	14.9268
2.5943	3.38309	4.32917	7.22552	4.01132	8.80218	9.73116	14.929
2.59518	3.36124	4.33039	7.22681	4.01076	4.37712	9.73408	14.931
2.59611	3.38483	4.33161	7.2281	4.01579	8.81283	9.73698	14.933
2.597	3.36291	4.33283	7.22939	4.01744	4.37739	9.73983	14.936
2.59791	3.38655	4.33405	7.23066	4.0211	8.82335	9.74266	14.9377
2.5988	3.36456	4.33526	7.23194	4.02351	4.3777	9.74546	14.9396
2.5997	3.38826	4.33647	7.23321	4.0267	8.83375	9.74822	14.9416
2.60058	3.36621	4.33767	7.23447	4.02936	4.37805	9.75096	14.9435
2.60146	3.38996	4.33888	7.23573	4.03234	8.844	9.75365	14.9454
2.60234	3.36784	4.34008	7.23698	4.03508	4.37844	9.75632	14.9465
2.60322	3.39165	4.34128	7.23824	4.03799	8.85416	9.75895	14.9489
2.60409	3.36946	4.34247	7.23952	4.04071	4.37884	9.76155	14.9509
2.60495	3.39332	4.34367	7.24079	4.0436	8.86423	9.76411	14.9528
2.60581	3.37106	4.34486	7.24202	4.04631	4.37924	9.76663	14.9547
2.60667	3.39498	4.34605	7.24325	4.04912	8.87414	9.76913	14.9566
2.60753	3.37266	4.34723	7.24447	4.05187	4.37973	9.77158	14.9586
2.60838	3.39663	4.34842	7.24569	4.05463	8.88393	9.774	14.9606
2.60922	3.37425	4.3496	7.24692	4.05737	4.38023	9.77638	14.9625
2.61006	3.39827	4.35078	7.24815	4.06006	8.89363	9.77872	14.9651
2.6109	3.37582	4.35196	7.24938	4.06282	4.38072	9.78102	14.966
2.61173	3.3999	4.35314	7.25062	4.06546	8.90321	9.78328	14.9683
2.61256	3.37738	4.35432	7.25184	4.06821	4.38127	9.7855	14.9702
2.61339	3.40151	4.35549	7.25306	4.07083	8.91269	9.78767	14.9721
2.61421	3.37893	4.35667	7.25427	4.07351	4.38184	9.78981	14.974
2.61503	3.40312	4.35784	7.25548	4.07617	8.92203	9.7919	14.9759
2.61584	3.38048	4.35901	7.25668	4.07882	4.38244	9.79394	14.9778
2.61665	3.40471	4.36019	7.25788	4.08142	8.93126	9.79594	14.9797
2.61745	3.38201	4.36136	7.25906	4.08404	4.38309	9.7979	14.9816
2.61826	3.40629	4.36253	7.26024	4.08665	8.94037	9.7998	14.9835
2.61906	3.38353	4.3637	7.26141	4.08925	4.38377	9.80166	14.9853
2.61985	3.40786	4.36487	7.26258	4.0918	8.9494	9.80347	14.9871
2.62064	3.38504	4.36604	7.26374	4.09441	4.38446	9.80523	14.9889
2.62143	3.40942	4.36721	7.26489	4.09693	8.95831	9.80693	14.9907
2.62221	3.38654	4.36838	7.26604	4.09949	4.38519	9.80858	14.9925
2.62299	3.41097	4.36955	7.26717	4.10202	8.96711	9.81018	14.9943
2.62376	3.38803	4.37072	7.26831	4.10454	4.38594	9.81173	14.996
2.62453	3.4125	4.37189	7.26943	4.10706	8.97583	9.81321	14.9978
2.6253	3.38951	4.37307	7.27055	4.10955	4.38669	9.81465	14.9995
2.62607	3.41403	4.37424	7.27166	4.11204	8.98443	9.81602	15.0012
2.62683	3.39098	4.37542	7.27277	4.11452	4.38747	9.81733	15.0029
2.62758	3.41554	4.37659	7.27387	4.11698	8.99295	9.81858	15.0046
2.62834	3.39244	4.37777	7.27496	4.11942	4.38831	9.81978	15.0063
2.62909	3.41705	4.37895	7.27605	4.12187	9.00133	9.82091	15.008
2.62983	3.39389	4.38014	7.27713	4.1243	4.3892	9.82198	15.0097
2.63057	3.41855	4.38132	7.2782	4.12674	9.0096	9.82299	15.0113
2.63131	3.39533	4.38251	7.27927	4.12912	4.39009	9.82394	15.0129
2.63205	3.42003	4.3837	7.28033	4.13154	9.01782	9.82483	15.0146
2.63278	3.39676	4.3849	7.28138	4.13392	4.391	9.82566	15.0162
2.63351	3.42151	4.38609	7.28243	4.13631	9.02591	9.82643	15.0178
2.63423	3.39819	4.38729	7.28347	4.13865	4.39193	9.82715	15.0194
2.63495	3.42297	4.3885	7.28451	4.14101	9.03392	9.82781	15.021
2.63567	3.3996	4.38971	7.28555	4.14337	4.39287	9.82841	15.0225
2.63638	3.42443	4.39092	7.28658	4.14568	9.0418	9.82897	15.0241
2.6371	3.401	4.39213	7.2876	4.14803	4.39386	9.82947	15.0257
2.6378	3.42587	4.39335	7.28862	4.15032	9.04962	9.82993	15.0272
2.63851	3.40239	4.39458	7.28964	4.15262	4.39485	9.83034	15.0288
2.63921	3.4273	4.3958	7.29064	4.1549	9.0573	9.83073	15.0303
2.6399	3.40377	4.39704	7.29164	4.1572	4.39589	9.83108	15.0318
2.6406	3.42872	4.39827	7.29264	4.15946	9.06491	9.8314	15.0333
2.64129	3.40514	4.39952	7.29363	4.16172	4.39693	9.83171	15.0348
2.64198	3.43014	4.40076	7.29461	4.16398	9.07244	9.83199	15.0363
2.64266	3.40651	4.40201	7.29558	4.1662	4.39798	9.83226	15.0378
2.64334	3.43154	4.40327	7.29656	4.16844	9.07986	9.83252	15.0392
2.64402	3.40786	4.40452	7.29753	4.17066	4.39907	9.83278	15.0407
2.64469	3.43293	4.40579	7.29849	4.17284	9.08717	9.83304	15.0421
2.64536	3.4092	4.40705	7.29945	4.17507	4.40019	9.83331	15.0436
2.64603	3.43431	4.40832	7.3004	4.17722	9.0944	9.8336	15.045
2.64669	3.41053	4.40959	7.30135	4.17943	4.40133	9.83388	15.0464
2.64735	3.43568	4.41086	7.30229	4.1816	9.1015	9.83419	15.0478
2.64801	3.41186	4.41213	7.30323	4.18371	4.40251	9.83452	15.0492
2.64867	3.43704	4.41341	7.30416	4.18591	9.10856	9.83502	15.0506
2.64932	3.41317	4.41469	7.30509	4.188	4.40367	9.83548	15.052
2.64997	3.4384	4.41597	7.30601	4.19017	9.11552	9.83597	15.0541
2.65061	3.41448	4.41726	7.30702	4.19225	4.40487	9.83651	15.0556
2.65125	3.43974	4.41855	7.30802	4.19439	9.12235	9.8371	15.0572
2.65189	3.41578	4.41985	7.30903	4.19648	4.40613	9.8377	15.0587
2.65253	3.44107	4.42115	7.31003	4.19855	9.1291	9.83838	15.0606
2.65316	3.41706	4.42246	7.31101	4.20063	4.40737	9.83899	15.0618
2.65379	3.44239	4.42377	7.312	4.2027	9.13582	9.8398	15.0633
2.65442	3.41834	4.42507	7.31293	4.20478	4.40862	9.84055	15.0647
2.65504	3.44371	4.42639	7.31385	4.2068	9.1424	9.84132	15.0663
2.65566	3.41961	4.4277	7.31478	4.20885	4.40993	9.84224	15.0678
2.65628	3.44501	4.42902	7.31564	4.21086	9.14889	9.84316	15.0682
2.65689	3.42088	4.43034	7.31648	4.21292	4.41124	9.84403	15.0695
2.6575	3.44631	4.43166	7.31732	4.21489	9.15534	9.84493	15.0707
2.65811	3.42213	4.43298	7.31815	4.21692	4.41256	9.84581	15.0719
2.65872	3.44759	4.43431	7.31898	4.21889	9.16167	9.84673	15.0731
2.65932	3.42337	4.43562	7.31981	4.22091	4.4139	9.8479	15.0743
2.65992	3.44887	4.43694	7.32063	4.22284	9.16794	9.84879	15.0754
2.66052	3.42461	4.43826	7.32145	4.22485	4.41527	9.84976	15.0766
2.66111	3.45014	4.43957	7.32226	4.22676	9.17411	9.85104	15.0778
2.6617	3.42584	4.44089	7.32307	4.22873	4.41666	9.85202	15.079
2.66229	3.45139	4.4422	7.32388	4.23065	9.18019	9.85337	15.0801
2.66287	3.42706	4.44352	7.32468	4.23262	4.41811	9.85433	15.0813
2.66346	3.45265	4.44483	7.32548	4.23448	9.18622	9.85542	15.0824
2.66404	3.42827	4.44614	7.32628	4.23643	4.41956	9.85674	15.0836
2.66461	3.4539	4.44744	7.32707	4.23831	9.19214	9.85786	15.0847
2.66519	3.42948	4.44874	7.32786	4.24022	4.42103	9.85921	15.0858
2.66576	3.45513	4.45004	7.32864	4.24209	9.198	9.86036	15.087
2.66633	3.43068	4.45133	7.32943	4.24396	4.42252	9.86174	15.0881
2.66689	3.45636	4.45263	7.33021	4.24583	9.20378	9.86323	15.0892
2.66745	3.43187	4.45392	7.33098	4.24769	4.424	9.86431	15.0903
2.66801	3.45758	4.45521	7.33175	4.24953	9.20953	9.86582	15.0918
2.66857	3.43306	4.4565	7.33255	4.25137	4.4255	9.86695	15.0929
2.66913	3.45879	4.45778	7.33334	4.25322	9.21513	9.86848	15.0941
2.66968	3.43423	4.45905	7.33414	4.25502	4.42705	9.86969	15.0953
2.67023	3.46	4.46032	7.33493	4.25686	9.22071	9.87116	15.0963
2.67077	3.4354	4.46159	7.3357	4.25864	4.42859	9.87237	15.0974
2.67132	3.46119	4.46284	7.33648	4.26044	9.22617	9.87387	15.0985
2.67186	3.43656	4.4641	7.33725	4.26224	4.43017	9.87545	15.0997
2.6724	3.46238	4.46536	7.33801	4.26402	9.2316	9.87665	15.1008
2.67293	3.43771	4.4666	7.33877	4.26577	4.43173	9.87817	15.1022
2.67347	3.46356	4.46785	7.33952	4.26756	9.23693	9.87974	15.1028
2.674	3.43885	4.46909	7.34027	4.26928	4.43335	9.88099	15.1041
2.67453	3.46472	4.47032	7.34101	4.27108	9.24217	9.88254	15.1052
2.67505	3.43999	4.47155	7.34176	4.27275	4.43497	9.88412	15.1066
2.67558	3.46589	4.47278	7.3425	4.27455	9.24734	9.88541	15.1073
2.6761	3.44112	4.474	7.34323	4.27622	4.4366	9.88695	15.1083
2.67662	3.46704	4.47522	7.34392	4.27796	9.2527	9.88856	15.1095
2.67713	3.44224	4.47644	7.34464	4.27965	4.43817	9.88984	15.1108
2.67764	3.46819	4.47764	7.34534	4.28135	9.25774	9.89141	15.1112
2.67816	3.44336	4.47885	7.34607	4.28307	4.43986	9.893	15.1125
2.67866	3.46934	4.48005	7.34679	4.2847	9.26274	9.89431	15.1135
2.67917	3.44447	4.48124	7.34751	4.28641	4.44155	9.89588	15.1145
2.67967	3.47047	4.48243	7.34823	4.28805	9.26769	9.89746	15.1155
2.68017	3.44558	4.48362	7.34896	4.28973	4.44326	9.89907	15.1165
2.68067	3.4716	4.4848	7.34968	4.29135	9.27256	9.90035	15.1176
2.68117	3.44668	4.48597	7.35041	4.29302	4.445	9.90193	15.1187
2.68166	3.47273	4.48714	7.35114	4.29465	9.27736	9.90353	15.1197
2.68215	3.44777	4.48831	7.35185	4.29627	4.44676	9.90484	15.1208
2.68264	3.47384	4.48947	7.35256	4.29791	9.28206	9.90643	15.1224
2.68313	3.44886	4.49062	7.35325	4.29948	4.44854	9.90799	15.1226
2.68361	3.47495	4.49177	7.35394	4.30112	9.28673	9.90958	15.1247
2.68409	3.44993	4.49292	7.35461	4.3027	4.45032	9.91088	15.1254
2.68457	3.47605	4.49405	7.35528	4.30429	9.29133	9.91247	15.1264
2.68505	3.451	4.49519	7.35595	4.30587	4.45214	9.91402	15.1273
2.68552	3.47714	4.49632	7.35661	4.30745	9.29583	9.91561	15.1282
2.68599	3.45207	4.49744	7.35727	4.30899	4.45396	9.9169	15.1283
2.68646	3.47823	4.49856	7.35793	4.31059	9.30034	9.91844	15.1303
2.68693	3.45313	4.49967	7.35857	4.3121	4.45575	9.92004	15.1302
2.6874	3.4793	4.50078	7.35922	4.31368	9.30468	9.92159	15.1314
2.68786	3.45418	4.50188	7.35986	4.31519	4.45763	9.92318	15.1323
2.68832	3.48038	4.50299	7.36049	4.31673	9.30904	9.9244	15.1331
2.68878	3.45522	4.50408	7.36112	4.31823	4.45949	9.92596	15.1339
2.68924	3.48144	4.50517	7.36154	4.31979	9.3133	9.92752	15.1345
2.68969	3.45626	4.50625	7.36193	4.32125	4.46138	9.92909	15.1348
2.69014	3.4825	4.50733	7.36232	4.32279	9.31748	9.93034	15.1351
2.69059	3.45729	4.5084	7.36271	4.32424	4.46334	9.93188	15.1355
2.69104	3.48355	4.50946	7.36311	4.32578	9.32162	9.9334	15.136
2.69148	3.45831	4.51053	7.36354	4.3272	4.46526	9.93494	15.1363
2.69193	3.48459	4.51158	7.36396	4.32873	9.32571	9.93648	15.1367
2.69237	3.45933	4.51264	7.3644	4.33014	4.4672	9.9377	15.1371
2.69281	3.48563	4.51369	7.36484	4.33164	9.32973	9.93923	15.1376
2.69324	3.46034	4.51472	7.36527	4.33306	4.46912	9.94073	15.1381
2.69368	3.48666	4.51576	7.36572	4.33455	9.33374	9.94225	15.1386
2.69411	3.46135	4.51679	7.36617	4.33593	4.47106	9.94377	15.1391
2.69454	3.48769	4.51782	7.36662	4.33739	9.33765	9.94497	15.1395
2.69497	3.46235	4.51884	7.36707	4.33881	4.47305	9.94647	15.14
2.69539	3.4887	4.51985	7.36752	4.34021	9.3415	9.94795	15.1406
2.69582	3.46335	4.52086	7.36797	4.34165	4.47504	9.94943	15.141
2.69624	3.48972	4.52187	7.36842	4.34303	9.34535	9.95092	15.1416
2.69666	3.46434	4.52287	7.36887	4.34443	4.47701	9.95243	15.1421
2.69708	3.49072	4.52388	7.36933	4.34583	9.34911	9.95359	15.1426
2.69749	3.46532	4.52486	7.36978	4.3472	4.47902	9.95507	15.1431
2.69791	3.49172	4.52585	7.37024	4.3486	9.35279	9.95651	15.1436
2.69832	3.4663	4.52683	7.37069	4.34993	4.48106	9.95797	15.1442
2.69873	3.49272	4.52781	7.37114	4.35133	9.35642	9.95943	15.1447
2.69913	3.46727	4.52878	7.37159	4.35266	4.4831	9.9609	15.1452
2.69954	3.4937	4.52976	7.37205	4.35404	9.35999	9.96203	15.1457
2.69994	3.46823	4.53071	7.3725	4.35534	4.48514	9.96349	15.1463
2.70035	3.49468	4.53167	7.37295	4.35673	9.36355	9.96493	15.1468
2.70074	3.46919	4.53262	7.3734	4.358	4.48718	9.96635	15.1473
2.70114	3.49566	4.53357	7.37385	4.35939	9.36736	9.96778	15.1478
2.70154	3.47014	4.53452	7.3743	4.36066	4.48898	9.96891	15.1484
2.70193	3.49662	4.53545	7.37475	4.362	9.37046	9.9703	15.1489
2.70232	3.47109	4.53637	7.37519	4.36326	4.49133	9.97169	15.1494
2.70271	3.49758	4.5373	7.37564	4.36461	9.37382	9.97306	15.15
2.7031	3.47203	4.53822	7.37609	4.36588	4.49343	9.97445	15.1505
2.70349	3.49854	4.53914	7.37653	4.36716	9.37714	9.97587	15.151
2.70387	3.47296	4.54005	7.37697	4.36847	4.49555	9.97696	15.1516
2.70425	3.49949	4.54095	7.37742	4.3697	9.38037	9.97834	15.1522
2.70464	3.47389	4.54185	7.37789	4.37103	4.49768	9.97967	15.1528
2.70501	3.50043	4.54274	7.37836	4.37222	9.3836	9.98102	15.1534
2.70539	3.47482	4.54364	7.37883	4.37355	4.4998	9.98235	15.154
2.70577	3.50137	4.54452	7.3793	4.37473	9.38678	9.9837	15.1546
2.70614	3.47574	4.54541	7.37977	4.37602	4.50194	9.98506	15.1551
2.70651	3.5023	4.5463	7.38023	4.37725	9.38991	9.98613	15.1557
2.70688	3.47665	4.54716	7.38069	4.37846	4.50408	9.98747	15.1563
2.70725	3.50322	4.54803	7.38115	4.37973	9.393	9.98875	15.1569
2.70761	3.47756	4.54889	7.3816	4.38089	4.50625	9.99006	15.1575
2.70798	3.50414	4.54975	7.38206	4.38215	9.39602	9.99137	15.158
2.70834	3.47846	4.55061	7.38251	4.38336	4.50841	9.99266	15.1586
2.7087	3.50506	4.55146	7.38297	4.38454	9.39901	9.99397	15.1592
2.70906	3.47936	4.55231	7.38342	4.38576	4.51061	9.99501	15.1598
2.70942	3.50597	4.55315	7.38387	4.38692	9.40194	9.99631	15.1604
2.70977	3.48025	4.55398	7.38432	4.38812	4.51277	9.99759	15.161
2.71012	3.50687	4.55481	7.38477	4.38931	9.40487	9.9988	15.1615
2.71048	3.48113	4.55564	7.38522	4.39046	4.51497	10.0001	15.1621
2.71083	3.50777	4.55646	7.38566	4.39165	9.4077	10.0014	15.1627
2.71118	3.48201	4.55729	7.3861	4.3928	4.51718	10.0026	15.1633
2.71152	3.50866	4.55811	7.38654	4.39399	9.41051	10.0039	15.1638
2.71187	3.48289	4.55892	7.38698	4.39509	4.51941	10.0049	15.1646
2.71221	3.50954	4.55972	7.3874	4.39629	9.41325	10.0061	15.1651
2.71255	3.48376	4.56052	7.38782	4.39739	4.52164	10.0073	15.1655
2.71289	3.51043	4.56132	7.38825	4.39855	9.41597	10.0085	15.166
2.71323	3.48462	4.56211	7.38867	4.39967	4.52386	10.0097	15.1666
2.71357	3.5113	4.5629	7.38909	4.4008	9.41867	10.011	15.1669
2.7139	3.48548	4.56369	7.38948	4.40191	4.5261	10.0122	15.1675
2.71423	3.51217	4.56447	7.38986	4.40302	9.42127	10.0134	15.1679
2.71457	3.48634	4.56526	7.39024	4.40414	4.52836	10.0146	15.1685
2.7149	3.51303	4.56604	7.39065	4.40524	9.42387	10.0155	15.1688
2.71522	3.48718	4.5668	7.39104	4.40633	4.5306	10.0168	15.1695
2.71555	3.51389	4.56756	7.39145	4.40742	9.42644	10.0179	15.1698
2.71588	3.48803	4.56832	7.39183	4.40854	4.53286	10.0191	15.1703
2.7162	3.51475	4.56908	7.3922	4.40956	9.42894	10.0203	15.1707
2.71652	3.48887	4.56983	7.39258	4.41069	4.53515	10.0214	15.1712
2.71684	3.51559	4.57058	7.39295	4.41173	9.43139	10.0226	15.1716
2.71716	3.4897	4.57133	7.39333	4.41283	4.53745	10.0237	15.1721
2.71748	3.51644	4.57208	7.3937	4.41383	9.43382	10.0248	15.1725
2.71779	3.49053	4.57283	7.39407	4.41497	4.53973	10.026	15.1731
2.71811	3.51727	4.57357	7.39447	4.41593	9.43639	10.0269	15.1736
2.71842	3.49136	4.57429	7.39487	4.41706	4.5419	10.0281	15.1747
2.71873	3.51811	4.57501	7.39527	4.41802	9.43878	10.0291	15.1744
2.71904	3.49218	4.57574	7.39568	4.41913	4.5442	10.0303	15.1751
2.71935	3.51894	4.57645	7.39608	4.4201	9.44109	10.0314	15.1756
2.71966	3.49299	4.57717	7.39648	4.42119	4.54654	10.0325	15.1761
2.71996	3.51976	4.57788	7.39688	4.42214	9.44335	10.0336	15.1767
2.72026	3.49381	4.57859	7.39729	4.42321	4.54886	10.0347	15.1772
2.72057	3.52058	4.5793	7.39769	4.42417	9.44561	10.0358	15.1777
2.72087	3.49461	4.58001	7.39807	4.42524	4.55118	10.0369	15.1783
2.72116	3.5214	4.58071	7.39845	4.42617	9.44781	10.0381	15.1787
2.72146	3.49542	4.58141	7.39883	4.42721	4.55353	10.0389	15.1792
2.72176	3.52221	4.5821	7.39921	4.4282	9.44998	10.0399	15.1797
2.72205	3.49621	4.58278	7.39958	4.42917	4.55587	10.041	15.1802
2.72235	3.52301	4.58346	7.39995	4.43016	9.45212	10.0421	15.1806
2.72264	3.49701	4.58413	7.40032	4.43114	4.5582	10.0431	15.1811
2.72293	3.52381	4.58481	7.40069	4.43212	9.45423	10.0442	15.1816
2.72322	3.49779	4.58548	7.40106	4.43308	4.56054	10.0451	15.182
2.7235	3.52461	4.58615	7.40143	4.43403	9.45631	10.0462	15.1825
2.72379	3.49858	4.58682	7.4018	4.43499	4.5629	10.0474	15.183
2.72408	3.52539	4.58749	7.40216	4.43595	9.45833	10.0484	15.1834
2.72436	3.49936	4.58816	7.40252	4.4369	4.56527	10.0495	15.1839
2.72464	3.52618	4.58883	7.40288	4.43785	9.46033	10.0506	15.1843
2.72492	3.50013	4.58949	7.40324	4.43878	4.56763	10.0516	15.1848
2.7252	3.52696	4.59016	7.4036	4.43971	9.4623	10.0528	15.1852
2.72548	3.5009	4.59082	7.40395	4.44066	4.56997	10.0536	15.1857
2.72575	3.52773	4.59148	7.40431	4.44156	9.46426	10.0547	15.1861
2.72603	3.50166	4.59214	7.40467	4.44251	4.57235	10.0558	15.1866
2.7263	3.5285	4.5928	7.40502	4.4434	9.46876	10.0565	15.187
2.72658	3.50242	4.59344	7.40537	4.44435	4.57246	10.0575	15.1875
2.72685	3.52928	4.59407	7.40572	4.4452	9.47096	10.0585	15.1879
2.72712	3.50318	4.5947	7.40607	4.44617	4.57479	10.0595	15.1884
2.72738	3.53005	4.59533	7.40641	4.44703	9.47279	10.0605	15.1888
2.72765	3.50395	4.59596	7.40676	4.44795	4.57724	10.0615	15.1893
2.72792	3.53082	4.59658	7.40711	4.4488	9.47459	10.0624	15.1897
2.72818	3.50471	4.59721	7.40745	4.44973	4.57972	10.0635	15.1901
2.72844	3.53158	4.59783	7.40779	4.45057	9.47632	10.0644	15.1906
2.72871	3.50546	4.59845	7.40813	4.45149	4.5822	10.0654	15.191
2.72897	3.53234	4.59907	7.40846	4.45233	9.47804	10.0664	15.1914
2.72923	3.50621	4.59969	7.4088	4.45322	4.58467	10.0674	15.1919
2.72948	3.5331	4.60031	7.40913	4.45407	9.47974	10.0684	15.1923
2.72974	3.50696	4.60092	7.40947	4.45496	4.58716	10.0689	15.1927
2.72999	3.53385	4.60151	7.4098	4.45576	9.48139	10.0699	15.1932
2.73025	3.5077	4.6021	7.41013	4.45668	4.58963	10.0708	15.1936
2.7305	3.53459	4.60268	7.41046	4.45747	9.48303	10.0717	15.1939
2.73075	3.50844	4.60327	7.41079	4.45836	4.59213	10.0727	15.1947
2.731	3.53533	4.60385	7.4111	4.45915	9.48463	10.0736	15.1946
2.73125	3.50917	4.60443	7.41143	4.46004	4.59461	10.0745	15.1951
2.7315	3.53607	4.605	7.41174	4.46083	9.48621	10.0754	15.1955
2.73175	3.5099	4.60558	7.41206	4.46169	4.5971	10.0763	15.1959
2.73199	3.5368	4.60616	7.41238	4.46248	9.48776	10.0773	15.1963
2.73224	3.51062	4.60673	7.41269	4.46333	4.59958	10.0781	15.1967
2.73248	3.53753	4.6073	7.41301	4.46412	9.4893	10.079	15.1979
2.73272	3.51134	4.60787	7.41331	4.46496	4.60207	10.0799	15.1973
2.73296	3.53825	4.60844	7.41363	4.46574	9.49079	10.0808	15.198
2.7332	3.51206	4.609	7.41395	4.46657	4.60457	10.0818	15.1984
2.73344	3.53897	4.60957	7.41426	4.46735	9.49226	10.0822	15.1988
2.73368	3.51277	4.61011	7.41457	4.46816	4.60705	10.0831	15.1992
2.73391	3.53968	4.61065	7.41488	4.46893	9.49371	10.084	15.1999
2.73415	3.51347	4.61118	7.41517	4.46975	4.60956	10.0848	15.2
2.73438	3.54039	4.61171	7.41547	4.47052	9.49512	10.0857	15.2005
2.73462	3.51418	4.61225	7.41576	4.4713	4.61204	10.0865	15.2008
2.73485	3.5411	4.61279	7.41605	4.47208	9.49654	10.0875	15.2012
2.73508	3.51487	4.61332	7.41634	4.47287	4.61453	10.0883	15.2014
2.73531	3.5418	4.61386	7.41663	4.4736	9.49791	10.0891	15.2017
2.73553	3.51557	4.61439	7.41691	4.47439	4.61704	10.0899	15.202
2.73576	3.54249	4.61491	7.41723	4.47515	9.49924	10.0909	15.2024
2.73599	3.51626	4.61545	7.41754	4.47592	4.61953	10.0916	15.2028
2.73621	3.54318	4.61597	7.41785	4.47665	9.50058	10.0924	15.2031
2.73643	3.51694	4.61649	7.41811	4.47741	4.62201	10.0933	15.2036
2.73666	3.54387	4.61701	7.41841	4.47817	9.50188	10.0941	15.2039
2.73688	3.51762	4.61754	7.41872	4.4789	4.6245	10.095	15.2044
2.7371	3.54455	4.61806	7.41903	4.47965	9.50316	10.0954	15.2048
2.73732	3.5183	4.61855	7.41934	4.48037	4.62698	10.0962	15.2052
2.73754	3.54523	4.61904	7.41964	4.48113	9.50443	10.097	15.2056
2.73775	3.51897	4.61953	7.41994	4.48184	4.62947	10.0978	15.206
2.73797	3.54591	4.62002	7.42024	4.48256	9.50567	10.0985	15.2064
2.73818	3.51964	4.62051	7.42054	4.48331	4.63195	10.0993	15.2066
2.7384	3.54658	4.621	7.42078	4.48397	9.50689	10.1001	15.2069
2.73861	3.52031	4.62149	7.42101	4.48476	4.63444	10.1009	15.2072
2.73882	3.54724	4.62197	7.42124	4.4854	9.50808	10.1017	15.2076
2.73903	3.52097	4.62246	7.42149	4.48619	4.63694	10.1024	15.2078
2.73924	3.54791	4.62294	7.42175	4.4868	9.50924	10.1032	15.2081
2.73945	3.52163	4.62343	7.42201	4.48759	4.6394	10.104	15.2084
2.73966	3.54857	4.62391	7.42226	4.48823	9.51041	10.1048	15.2086
2.73986	3.52228	4.62439	7.42251	4.48894	4.6419	10.1055	15.209
2.74007	3.54922	4.62487	7.42277	4.48964	9.51153	10.1063	15.2092
2.74027	3.52293	4.62535	7.42302	4.49032	4.64436	10.1071	15.2095
2.74048	3.54987	4.62583	7.42328	4.49101	9.51266	10.1079	15.2098
2.74068	3.52357	4.62631	7.42353	4.49168	4.64684	10.1087	15.2102
2.74088	3.55051	4.62679	7.4238	4.49236	9.51375	10.109	15.2105
2.74108	3.52421	4.62724	7.42406	4.49305	4.6493	10.1097	15.2109
2.74128	3.55116	4.62769	7.42432	4.49369	9.51484	10.1104	15.2112
2.74148	3.52485	4.62813	7.42458	4.49439	4.65177	10.1111	15.2115
2.74168	3.55179	4.62858	7.42484	4.49501	9.51588	10.1119	15.2118
2.74187	3.52548	4.62902	7.4251	4.49573	4.65422	10.1126	15.2121
2.74207	3.55243	4.62946	7.42535	4.49633	9.51694	10.1133	15.2125
2.74226	3.52611	4.62991	7.42561	4.49704	4.65668	10.114	15.2128
2.74246	3.55306	4.63035	7.42586	4.49763	9.51796	10.1147	15.2131
2.74265	3.52674	4.63079	7.42612	4.49833	4.65915	10.1154	15.2134
2.74284	3.55368	4.63123	7.42638	4.49894	9.51896	10.1161	15.2138
2.74303	3.52736	4.63167	7.42663	4.49961	4.6616	10.1168	15.2141
2.74322	3.5543	4.63211	7.42688	4.50022	9.51994	10.1175	15.2144
2.74341	3.52798	4.63255	7.42712	4.5009	4.66405	10.1183	15.2147
2.7436	3.55492	4.63299	7.42737	4.50148	9.52091	10.1189	15.215
2.74379	3.52859	4.63342	7.42762	4.50215	4.66647	10.1196	15.2153
2.74397	3.55553	4.63386	7.42787	4.50275	9.52188	10.1203	15.2156
2.74416	3.5292	4.63429	7.42811	4.5034	4.66892	10.121	15.2159
2.74434	3.55614	4.63472	7.42836	4.504	9.52281	10.1217	15.2162
2.74453	3.5298	4.63516	7.4286	4.50464	4.67133	10.1224	15.2165
2.74471	3.55675	4.63559	7.42884	4.50522	9.52374	10.1231	15.2169
2.74489	3.53041	4.63602	7.42908	4.50586	4.67378	10.1234	15.2172
2.74507	3.55735	4.63642	7.42932	4.50646	9.52464	10.124	15.2175
2.74525	3.531	4.63682	7.42956	4.50705	4.67618	10.1247	15.2178
2.74543	3.55795	4.63722	7.4298	4.50768	9.52554	10.1253	15.2181
2.74561	3.5316	4.63762	7.43004	4.50824	4.67862	10.126	15.2184
2.74579	3.55854	4.63802	7.43027	4.5089	9.5264	10.1266	15.2186
2.74596	3.53219	4.63841	7.4305	4.50942	4.68102	10.1272	15.2189
2.74614	3.55913	4.63881	7.43074	4.51007	9.52726	10.1279	15.2192
2.74631	3.53277	4.63921	7.43097	4.51062	4.68343	10.1285	15.2195
2.74649	3.55971	4.6396	7.4312	4.51124	9.52811	10.1291	15.2198
2.74666	3.53336	4.63999	7.43142	4.51178	4.68583	10.1298	15.2201
2.74683	3.5603	4.64039	7.43165	4.5124	9.52894	10.1304	15.2203
2.747	3.53393	4.64078	7.43188	4.51297	4.68822	10.1311	15.2206
2.74717	3.56087	4.64118	7.4321	4.51351	9.52976	10.1317	15.2209
2.74734	3.53451	4.64157	7.43232	4.51411	4.69062	10.1323	15.2212
2.74751	3.56145	4.64196	7.43255	4.51467	9.53055	10.133	15.2215
2.74768	3.53508	4.64235	7.43277	4.51523	4.69298	10.1335	15.2217
2.74784	3.56202	4.64274	7.43299	4.51579	9.53136	10.1342	15.222
2.74801	3.53565	4.64312	7.43321	4.51637	4.69537	10.1348	15.2223
2.74818	3.56258	4.64351	7.43344	4.5169	9.53212	10.1354	15.2226
2.74834	3.53621	4.6439	7.43365	4.51747	4.69774	10.1361	15.2228
2.7485	3.56315	4.64429	7.43387	4.51803	9.53288	10.1367	15.2232
2.74867	3.53677	4.64467	7.4341	4.51855	4.70009	10.1373	15.2235
2.74883	3.56371	4.64506	7.43434	4.51912	9.53364	10.1379	15.2238
2.74899	3.53733	4.64544	7.43458	4.51967	4.70243	10.1381	15.2241
2.74915	3.56426	4.6458	7.43481	4.52019	9.53438	10.1387	15.2244
2.74931	3.53788	4.64615	7.43504	4.52073	4.70478	10.1393	15.2247
2.74947	3.56481	4.6465	7.43527	4.52128	9.5351	10.1398	15.225
2.74963	3.53843	4.64685	7.4355	4.52177	4.70714	10.1404	15.2252
2.74979	3.56536	4.6472	7.43571	4.52238	9.5358	10.141	15.2255
2.74994	3.53897	4.64755	7.43593	4.52282	4.70947	10.1415	15.2258
2.7501	3.5659	4.6479	7.43614	4.52342	9.53651	10.1421	15.226
2.75025	3.53952	4.64825	7.43636	4.52387	4.71178	10.1426	15.2263
2.75041	3.56644	4.6486	7.43657	4.52445	9.5372	10.1432	15.2266
2.75056	3.54005	4.64895	7.43678	4.52494	4.71411	10.1438	15.2269
2.75071	3.56698	4.64929	7.43699	4.52545	9.53787	10.1443	15.2282
2.75086	3.54059	4.64964	7.43717	4.52598	4.7164	10.1449	15.227
2.75102	3.56751	4.64998	7.43739	4.52648	9.53854	10.1454	15.2276
2.75117	3.54112	4.65033	7.43759	4.527	4.7187	10.146	15.2285
2.75132	3.56804	4.65067	7.43777	4.52749	9.5392	10.1466	15.2279
2.75147	3.54165	4.65102	7.43797	4.528	4.72099	10.1471	15.2284
2.75161	3.56857	4.65136	7.43815	4.52849	9.53984	10.1477	15.2286
2.75176	3.54217	4.6517	7.43836	4.52901	4.7233	10.1482	15.2288
2.75191	3.56909	4.65205	7.43855	4.52948	9.54046	10.1487	15.229
2.75205	3.54269	4.65238	7.43872	4.52998	4.72557	10.1493	15.2291
2.7522	3.56961	4.65272	7.43889	4.53047	9.54108	10.1498	15.2293
2.75234	3.5432	4.65306	7.43908	4.53098	4.72783	10.1504	15.2296
2.75249	3.57012	4.6534	7.43927	4.53141	9.5417	10.1509	15.2298
2.75263	3.54372	4.65374	7.43946	4.53197	4.73009	10.1515	15.23
2.75277	3.57063	4.65407	7.43965	4.53236	9.5423	10.152	15.2303
2.75292	3.54423	4.65441	7.43984	4.53293	4.73234	10.1526	15.2305
2.75306	3.57114	4.65475	7.44002	4.53333	9.54289	10.1531	15.2307
2.7532	3.54473	4.65509	7.44021	4.53385	4.73459	10.1532	15.2309
2.75334	3.57164	4.65539	7.4404	4.5343	9.54346	10.1537	15.2312
2.75348	3.54523	4.6557	7.44059	4.53478	4.73681	10.1542	15.2325
2.75361	3.57214	4.656	7.44076	4.53525	9.54404	10.1547	15.2312
2.75375	3.54573	4.6563	7.44095	4.53572	4.73903	10.1552	15.2319
2.75389	3.57264	4.6566	7.44113	4.53614	9.54461	10.1557	15.2324
2.75403	3.54623	4.6569	7.44129	4.53666	4.74126	10.1562	15.232
2.75416	3.57313	4.65721	7.44144	4.53707	9.54515	10.1567	15.2327
2.7543	3.54672	4.65751	7.44159	4.53756	4.74344	10.1571	15.2325
2.75443	3.57362	4.65781	7.44176	4.53797	9.5457	10.1576	15.2328
2.75456	3.54721	4.65811	7.44192	4.53846	4.74566	10.1581	15.2328
2.7547	3.57411	4.6584	7.44206	4.53888	9.54623	10.1586	15.233
2.75483	3.54769	4.6587	7.44219	4.53934	4.74784	10.1591	15.2333
2.75496	3.57459	4.659	7.44234	4.53977	9.54675	10.1596	15.2331
2.75509	3.54817	4.6593	7.44251	4.54025	4.75	10.16	15.2334
2.75522	3.57507	4.6596	7.44268	4.54063	9.54728	10.1605	15.2336
2.75535	3.54865	4.65989	7.44285	4.54114	4.75219	10.161	15.2338
2.75548	3.57554	4.66019	7.44302	4.5415	9.54778	10.1615	15.2341
2.75561	3.54912	4.66049	7.44319	4.54201	4.75434	10.1619	15.2342
2.75574	3.57602	4.66078	7.44336	4.54236	9.54828	10.1624	15.2344
2.75586	3.54959	4.66108	7.44352	4.54286	4.75649	10.1629	15.2347
2.75599	3.57648	4.66137	7.44369	4.54325	9.54877	10.1634	15.2349
2.75612	3.55006	4.66167	7.44386	4.54368	4.7586	10.1639	15.2351
2.75624	3.57695	4.66196	7.44403	4.54414	9.54926	10.1643	15.2362
2.75637	3.55052	4.66225	7.44418	4.5445	4.76075	10.1648	15.2351
2.75649	3.57741	4.66254	7.44435	4.54496	9.54972	10.1652	15.2357
2.75661	3.55098	4.66283	7.44451	4.54535	4.76285	10.1657	15.2363
2.75674	3.57787	4.66312	7.44466	4.54579	9.5502	10.1662	15.2359
2.75686	3.55144	4.66341	7.44481	4.54617	4.76496	10.1667	15.2363
2.75698	3.57832	4.6637	7.44495	4.54662	9.55066	10.1671	15.2363
2.7571	3.55189	4.66399	7.44507	4.54698	4.76706	10.1676	15.2364
2.75722	3.57877	4.66428	7.44519	4.54746	9.55111	10.1681	15.2365
2.75734	3.55234	4.66457	7.4453	4.54776	4.76916	10.1686	15.2366
2.75746	3.57922	4.66486	7.44542	4.54829	9.55155	10.169	15.2367
2.75758	3.55279	4.66514	7.44553	4.54855	4.7712	10.1695	15.2369
2.7577	3.57967	4.66543	7.44567	4.54909	9.552	10.1695	15.237
2.75781	3.55324	4.66569	7.44584	4.54935	4.77327	10.1699	15.2371
2.75793	3.58011	4.66594	7.44599	4.54987	9.55243	10.1703	15.2373
2.75805	3.55368	4.66619	7.44614	4.55015	4.77532	10.1707	15.2375
2.75816	3.58055	4.66645	7.4463	4.55064	9.55285	10.1712	15.2376
2.75828	3.55411	4.6667	7.44645	4.55095	4.77737	10.1716	15.2378
2.75839	3.58098	4.66695	7.4466	4.55141	9.55327	10.172	15.238
2.75851	3.55455	4.6672	7.44675	4.55173	4.77942	10.1724	15.2382
2.75862	3.58141	4.66746	7.4469	4.55216	9.55367	10.1728	15.2384
2.75873	3.55498	4.66771	7.44705	4.55252	4.78142	10.1732	15.2385
2.75885	3.58184	4.66796	7.4472	4.55289	9.55409	10.1736	15.2394
2.75896	3.5554	4.66821	7.44734	4.5533	4.78344	10.174	15.2386
2.75907	3.58226	4.66846	7.44749	4.55364	9.55448	10.1744	15.2391
2.75918	3.55583	4.66871	7.44763	4.55403	4.78543	10.1748	15.2392
2.75929	3.58269	4.66896	7.44777	4.55439	9.55487	10.1752	15.2404
2.7594	3.55625	4.6692	7.4479	4.55479	4.78744	10.1756	15.2391
2.75951	3.5831	4.66945	7.44801	4.55511	9.55525	10.176	15.2407
2.75962	3.55667	4.6697	7.44813	4.55554	4.7894	10.1764	15.2393
2.75973	3.58352	4.66995	7.44824	4.55586	9.55563	10.1768	15.2398
2.75983	3.55708	4.6702	7.44834	4.55624	4.79139	10.1772	15.2399
2.75994	3.58393	4.67045	7.44844	4.55658	9.556	10.1776	15.2399
2.76005	3.55749	4.67069	7.44854	4.55697	4.79334	10.178	15.24
2.76015	3.58434	4.67094	7.44863	4.55728	9.55637	10.1784	15.2403
2.76026	3.5579	4.67119	7.44876	4.5577	4.79528	10.1788	15.2401
2.76036	3.58474	4.67143	7.44889	4.558	9.55673	10.1792	15.2403
2.76047	3.5583	4.67168	7.44903	4.55839	4.79722	10.1796	15.2405
2.76057	3.58515	4.67192	7.44917	4.55869	9.55708	10.18	15.2407
2.76067	3.55871	4.67217	7.44931	4.5591	4.79914	10.1804	15.2408
2.76078	3.58554	4.67241	7.44945	4.55941	9.55743	10.1808	15.241
2.76088	3.5591	4.67265	7.44958	4.55976	4.80103	10.1811	15.2412
2.76098	3.58594	4.67289	7.44972	4.56012	9.55779	10.1815	15.2413
2.76108	3.5595	4.67313	7.44985	4.56046	4.80296	10.1819	15.2415
2.76118	3.58633	4.67337	7.44998	4.56078	9.55811	10.1823	15.2416
2.76128	3.55989	4.67361	7.45011	4.56113	4.80485	10.1827	15.2418
2.76138	3.58672	4.67385	7.45025	4.56147	9.55845	10.1831	15.242
2.76148	3.56028	4.67409	7.45038	4.56181	4.80672	10.1835	15.2421
2.76158	3.58711	4.67433	7.45051	4.56211	9.55878	10.1839	15.2423
2.76168	3.56067	4.67457	7.45064	4.5625	4.80859	10.1843	15.2424
2.76178	3.58749	4.67481	7.45077	4.56277	9.5591	10.1847	15.243
2.76187	3.56105	4.67505	7.45089	4.56314	4.81042	10.1851	15.2434
2.76197	3.58787	4.67528	7.451	4.56345	9.55943	10.1855	15.2425
2.76207	3.56143	4.67552	7.45109	4.5638	4.8123	10.1859	15.2433
2.76216	3.58825	4.67576	7.4512	4.56409	9.55973	10.1858	15.2428
2.76226	3.56181	4.67597	7.45128	4.56444	4.81413	10.1861	15.243
2.76235	3.58863	4.67617	7.45136	4.56472	9.56004	10.1864	15.2431
2.76245	3.56218	4.67637	7.45144	4.56511	4.81594	10.1868	15.2431
2.76254	3.589	4.67658	7.45152	4.56534	9.56035	10.1871	15.2432
2.76264	3.56255	4.67678	7.45161	4.56573	4.81775	10.1874	15.2436
2.76273	3.58937	4.67698	7.45171	4.56598	9.56065	10.1877	15.2431
2.76282	3.56292	4.67718	7.45189	4.56638	4.81956	10.1881	15.2435
2.76291	3.58973	4.67738	7.45208	4.56658	9.56094	10.1884	15.2437
2.76301	3.56329	4.67758	7.45227	4.56701	4.82135	10.1887	15.244
2.7631	3.59009	4.67778	7.45245	4.5672	9.56123	10.189	15.2442
2.76319	3.56365	4.67799	7.45263	4.56762	4.82313	10.1894	15.2445
2.76328	3.59045	4.67819	7.4528	4.56782	9.56152	10.1897	15.2452
2.76337	3.56401	4.67839	7.45296	4.56821	4.82487	10.19	15.2449
2.76346	3.59081	4.67859	7.45313	4.56844	9.5618	10.1903	15.2453
2.76355	3.56437	4.67879	7.4533	4.56881	4.82664	10.1907	15.2466
2.76363	3.59116	4.67899	7.45345	4.56907	9.56208	10.191	15.2453
2.76372	3.56472	4.67918	7.45358	4.56937	4.82838	10.1914	15.247
2.76381	3.59152	4.67938	7.45372	4.56967	9.56235	10.1913	15.2457
2.7639	3.56507	4.6796	7.45385	4.56998	4.83011	10.1921	15.2463
2.76398	3.59186	4.67981	7.45396	4.57025	9.56262	10.192	15.2464
2.76407	3.56542	4.68003	7.45408	4.57056	4.83183	10.1927	15.2465
2.76416	3.59221	4.68023	7.45419	4.57084	9.56289	10.1927	15.2474
2.76424	3.56576	4.68044	7.45433	4.57114	4.83354	10.193	15.2467
2.76433	3.59255	4.68066	7.45449	4.57142	9.56315	10.1934	15.2472
2.76441	3.56611	4.68088	7.45464	4.57171	4.83523	10.1937	15.2474
2.7645	3.59289	4.6811	7.45479	4.57197	9.56341	10.1941	15.2476
2.76458	3.56645	4.68132	7.45495	4.57231	4.83691	10.1944	15.2479
2.76466	3.59323	4.68153	7.4551	4.57251	9.56366	10.1948	15.2481
2.76475	3.56678	4.68175	7.45526	4.57288	4.83859	10.1951	15.2481
2.76483	3.59356	4.68196	7.4554	4.57309	9.56391	10.1955	15.2484
2.76491	3.56712	4.68217	7.45554	4.57341	4.84026	10.1958	15.2486
2.76499	3.59389	4.68238	7.45568	4.57364	9.56416	10.1962	15.2488
2.76507	3.56745	4.6826	7.45581	4.57397	4.84191	10.1965	15.249
2.76516	3.59422	4.68281	7.45595	4.57421	9.5644	10.1968	15.2491
2.76524	3.56778	4.68302	7.45608	4.57449	4.84355	10.1972	15.2493
2.76532	3.59455	4.68323	7.45621	4.57477	9.56463	10.1975	15.2506
2.7654	3.5681	4.68344	7.45632	4.57502	4.84519	10.1978	15.2493
2.76548	3.59487	4.68364	7.45644	4.57531	9.56487	10.1982	15.2511
2.76555	3.56842	4.68385	7.45657	4.57557	4.8468	10.1985	15.2498
2.76563	3.59519	4.68406	7.45671	4.57583	9.5651	10.1989	15.2504
2.76571	3.56874	4.68427	7.45684	4.57609	4.84842	10.1992	15.2506
2.76579	3.59551	4.68447	7.45697	4.57637	9.56532	10.1995	15.2514
2.76587	3.56906	4.68468	7.4571	4.57664	4.84999	10.1998	15.2506
2.76594	3.59582	4.68488	7.45725	4.57687	9.56556	10.2002	15.2511
2.76602	3.56938	4.68508	7.45739	4.57716	4.85158	10.2005	15.2513
2.7661	3.59614	4.68528	7.45754	4.57738	9.56578	10.2008	15.2516
2.76617	3.56969	4.68549	7.45768	4.57767	4.85318	10.2012	15.2518
2.76625	3.59644	4.68569	7.45782	4.57789	9.56599	10.2015	15.252
2.76632	3.57	4.68589	7.45796	4.57818	4.85473	10.2014	15.2522
2.7664	3.59675	4.68606	7.4581	4.57842	9.56621	10.2017	15.2524
2.76647	3.57031	4.68624	7.45824	4.57867	4.85627	10.202	15.2525
2.76655	3.59706	4.68641	7.45836	4.57894	9.56642	10.2023	15.2527
2.76662	3.57061	4.68658	7.45849	4.57916	4.85782	10.2026	15.2528
2.76669	3.59736	4.68675	7.45862	4.57943	9.56663	10.2028	15.253
2.76677	3.57091	4.68692	7.45875	4.57966	4.85933	10.2031	15.2532
2.76684	3.59766	4.68709	7.45888	4.57991	9.56684	10.2034	15.2542
2.76691	3.57121	4.68726	7.45899	4.58017	4.86088	10.2037	15.2543
2.76698	3.59795	4.68743	7.45909	4.5804	9.56704	10.2039	15.2532
2.76706	3.57151	4.6876	7.45918	4.58065	4.86237	10.2042	15.2548
2.76713	3.59825	4.68777	7.45927	4.58078	9.56724	10.2045	15.2536
2.7672	3.5718	4.68793	7.45938	4.58116	4.86386	10.2047	15.2541
2.76727	3.59854	4.6881	7.45947	4.58137	9.56744	10.205	15.2542
2.76734	3.5721	4.68827	7.45957	4.5815	4.86535	10.2053	15.2543
2.76741	3.59883	4.68843	7.45966	4.58187	9.56763	10.2055	15.2544
2.76748	3.57239	4.6886	7.45976	4.58197	4.86685	10.2058	15.2556
2.76755	3.59912	4.68876	7.45987	4.58241	9.56782	10.206	15.2544
2.76761	3.57267	4.68892	7.46002	4.58234	4.86829	10.2063	15.255
2.76768	3.5994	4.68909	7.46015	4.58288	9.56802	10.2066	15.2552
2.76775	3.57296	4.68925	7.46029	4.58281	4.86976	10.2068	15.2554
2.76782	3.59968	4.68941	7.46042	4.58334	9.56819	10.2071	15.2556
2.76788	3.57324	4.68957	7.46056	4.58327	4.87119	10.2073	15.2558
2.76795	3.59996	4.68973	7.46069	4.58378	9.56838	10.2076	15.256
2.76802	3.57352	4.68989	7.46083	4.58373	4.87262	10.2079	15.2561

## Sheet: A30
0.772315	0.712499	0.324299	0.451914	0.619556	0.718353
0.772196	0.712217	0.717353	0.451914	0.372133	0.718788
0.704071	0.712423	0.389167	0.451914	0.76309	0.719129
0.468076	0.71218	0.583218	0.451914	0.337616	0.718349
0.263474	0.712219	0.433797	0.451914	0.76032	0.7184
0.40038	0.712299	0.438531	0.451914	0.76141	0.719002
0.506082	0.712697	0.688646	0.451914	0.393473	0.718357
0.582997	0.712239	0.35554	0.451914	0.427689	0.718361
0.335475	0.712231	0.311104	0.451914	0.327186	0.718356
0.544784	0.712148	0.356888	0.451914	0.55844	0.718359
0.322557	0.712246	0.592109	0.451914	0.306866	0.71873
0.628135	0.712599	0.511604	0.451914	0.587002	0.718396
0.629191	0.712165	0.549568	0.451914	0.904462	0.718954
0.538395	0.712223	0.304191	0.451914	0.337415	0.718358
0.599585	0.712731	0.340224	0.451914	0.739763	0.718744
0.541494	0.712284	0.502522	0.451914	0.380504	0.718943
0.406483	0.712261	0.800358	0.451914	0.659886	0.718471
0.526673	0.712333	0.857298	0.451914	0.482775	0.718972
0.508768	0.712367	0.701313	0.451914	0.371383	0.718458
0.596529	0.712194	0.617557	0.451914	0.404668	0.718368
1.76e-07	0.827599	5.42e-11	1	2.25e-14	0.777177
5.73e-11	0.827593	1.09e-11	1	3.93e-07	0.7772
2.22e-14	0.8276	4.43e-14	1	1.16e-12	0.777169
2.09e-11	0.827587	1.44e-13	1	1.62e-11	0.777168
2.17e-07	0.82759	7.17e-13	1	2.27e-09	0.777189
1.45e-06	0.827596	2.22e-14	1	3.02e-14	0.777158
7.75e-12	0.827619	1.72e-11	1	2.97e-14	0.777177
7.58e-11	0.827594	3.03e-10	1	4.41e-14	0.777173
1.48e-07	0.827599	1.31e-13	1	3.44e-11	0.777174
4.42e-14	0.827582	3.03e-13	1	2.53e-14	0.777178
1.64e-11	0.82761	2.09e-13	1	2.22e-14	0.777197
4.67e-13	0.827593	1.36e-09	1	4.63e-12	0.777176
2.66e-13	0.827582	2.22e-14	1	4.35e-14	0.777233
7.99e-12	0.827595	2.67e-14	1	2.76e-10	0.777176
2.56e-14	0.82761	1.91e-11	1	2.23e-14	0.777202
2.33e-07	0.827583	1.37e-11	1	2.31e-14	0.777172
5.19e-09	0.827594	6.83e-13	1	4.35e-10	0.77719
2.51e-14	0.827585	2.23e-14	1	4.14e-14	0.777229
7.45e-10	0.827586	4.41e-14	1	3.23e-09	0.777191
2.95e-11	0.827589	1.15e-12	1	3.09e-07	0.777171
1.24e-07	0.999451	0.704489	1	0.332107	0.999995
0.000113178	0.999918	0.150338	1	0.723891	0.999329
0.0607214	0.999634	0.553433	1	0.184143	0.998959
0.281746	1	0.280791	1	0.817116	0.99995
0.674494	0.999903	0.473477	1	0.187002	0.99989
0.372244	0.999844	0.465828	1	0.185878	0.999134
0.239261	0.999136	0.177323	1	0.673898	0.999993
0.164557	0.99986	0.625398	1	0.603276	0.999993
0.487343	0.999982	0.74235	1	0.84892	0.999999
0.200174	0.999954	0.622277	1	0.403332	0.999997
0.515168	0.999839	0.27149	1	0.916775	0.999439
0.124986	0.999432	0.362727	1	0.368914	0.999843
0.124082	0.999899	0.317548	1	7.21e-05	0.998935
0.206389	0.999928	0.763427	1	0.81771	0.999996
0.149769	0.999423	0.662482	1	0.207993	0.99938
0.203363	0.999705	0.374252	1	0.703665	0.999132
0.363084	0.999884	0.0682462	1	0.28912	0.999814
0.218022	0.999722	0.000243058	1	0.508296	0.998942
0.236427	0.999756	0.165425	1	0.725744	0.999836
0.152468	0.999986	0.245633	1	0.649607	0.99999

## Sheet: A31
0.51033	0.538395	0.889555	0.838191
0.914659	0.538395	0.812243	0.838759
0.399966	0.538395	0.616318	0.839169
0.421638	0.538395	0.533388	0.837938
0.405366	0.538395	0.719038	0.841112
0.583659	0.538395	0.675754	0.83799
0.499862	0.538395	0.394641	0.841092
0.454175	0.538395	0.463633	0.840499
0.606484	0.538395	0.741408	0.838721
0.575115	0.538395	0.567974	0.840491
0.57235	0.538395	0.635296	0.838168
0.781654	0.538395	0.93639	0.839459
0.57195	0.538395	0.435546	0.839679
0.54309	0.538395	0.464476	0.834324
0.858628	0.538395	0.52331	0.838028
0.618703	0.538395	0.490179	0.839903
0.843151	0.538395	0.540549	0.826344
0.400376	0.538395	0.634664	0.83694
0.313563	0.538395	0.644529	0.836643
0.55469	0.538395	0.583467	0.836853
0.582461	0.538395	0.57901	0.840719
9.03e-10	1	4.27e-14	0.327354
1.44e-10	1	2.41e-11	0.32736
2.22e-14	1	1.96e-08	0.327368
2.22e-14	1	8.69e-14	0.327351
2.25e-14	1	1.46e-12	0.327366
4.31e-08	1	2.82e-14	0.327374
1.6e-10	1	9.59e-08	0.32736
2.14e-10	1	6.01e-12	0.327332
1.03e-08	1	2.65e-14	0.327345
1.21e-10	1	1.4e-12	0.327359
5.36e-11	1	2.8e-14	0.327354
4.67e-13	1	2.22e-14	0.327353
4.12e-08	1	3.35e-13	0.327357
6.99e-12	1	2.22e-14	0.327334
9.06e-11	1	1.53e-10	0.32736
4.73e-08	1	2.63e-14	0.327389
3.01e-13	1	4.35e-14	0.327358
1.43e-12	1	4.49e-13	0.327361
6.18e-09	1	5.69e-08	0.327357
3.86e-12	1	8.24e-08	0.327361
7.73e-14	1	3.72e-11	0.327361
0.495049	1	0.439379	0.984754
3e-05	1	0.24667	0.98357
0.69389	1	0.470776	0.983073
0.647687	1	0.586676	0.985468
0.681959	1	0.350899	0.980727
0.39776	1	0.399485	0.985137
0.510679	1	0.86686	0.980913
0.585766	1	0.708957	0.98194
0.370837	1	0.326	0.984208
0.408182	1	0.535323	0.982632
0.411598	1	0.447226	0.984735
0.185443	1	0.0451442	0.983758
0.412095	1	0.767732	0.982923
0.449213	1	0.70729	0.989983
0.0939952	1	0.602642	0.985324
0.356909	1	0.658928	0.982559
0.114436	1	0.575622	0.999975
0.692974	1	0.447997	0.98668
0.936178	1	0.436062	0.986633
0.433966	1	0.513827	0.986842
0.399209	1	0.519926	0.981141

## Sheet: A4
2.7042	0.000543944	4971.46
2.67566	0.000531326	5035.82
2.60153	0.000513484	5066.42
2.53159	0.000497196	5091.74
3.00883	0.000396278	7592.73
2.9356	0.000383859	7647.61
2.84452	0.00037065	7674.41
2.86838	0.000366764	7820.77
2.82294	0.000358126	7882.55
2.78467	0.000350549	7943.75
2.75245	0.00034301	8024.39
2.69482	0.000335429	8033.93
2.62671	0.000326477	8045.62
2.5974	0.000321237	8085.63
2.60527	0.000318595	8177.38
2.58162	0.000313895	8224.47
2.55138	0.000308963	8257.86
3.31403	0.000287151	11541.1
3.19594	0.000276481	11559.3
3.21994	0.000273342	11779.9
3.22916	0.000269849	11966.6
3.22386	0.000265978	12120.8
3.17551	0.000260279	12200.4
3.10048	0.000253601	12225.8
3.08291	0.000249986	12332.3

## Sheet: A5
3.828	0.0001	1.2
3.64534	0.000191016	1.23825
3.76384	0.000138592	1.22449
3.71494	0.000187201	1.26238
3.80589	0.000173745	1.28618
3.85117	0.000179578	1.30924
3.90736	0.000179541	1.33111
3.9583	0.000181458	1.35294
4.00951	0.000182778	1.37431
4.05944	0.000184265	1.39537
4.10864	0.000185695	1.41611
4.15704	0.000187125	1.43656
4.20473	0.000188535	1.45674
4.25174	0.00018993	1.47667
4.29811	0.000191297	1.49633
4.34387	0.000192654	1.51576
4.38905	0.000193988	1.53497
4.43369	0.000195303	1.55396
4.47781	0.000196596	1.57275
4.52142	0.00019787	1.59133
4.56455	0.000199124	1.60972
4.60721	0.000200358	1.62792
4.64941	0.000201572	1.64594
4.69117	0.000202767	1.66378
4.7325	0.000203944	1.68144
4.77341	0.000205103	1.69894
4.81392	0.000206243	1.71627
4.85404	0.000207366	1.73345
4.89377	0.000208471	1.75046
4.93313	0.00020956	1.76733
4.97212	0.000210633	1.78404
5.01076	0.000211689	1.80061
5.04905	0.000212729	1.81704
5.08699	0.000213754	1.83333
5.12461	0.000214763	1.84948
5.1619	0.000215758	1.8655
5.19887	0.000216738	1.8814
5.23553	0.000217703	1.89716
5.27189	0.000218654	1.9128
5.30795	0.000219591	1.92832
5.34371	0.000220514	1.94372
5.3792	0.000221423	1.95901
5.4144	0.00022232	1.97418
5.44932	0.000223203	1.98924
5.48398	0.000224073	2.00419
5.51837	0.00022493	2.01903
5.5525	0.000225775	2.03377
5.58638	0.000226608	2.0484
5.62001	0.000227428	2.06293
5.65339	0.000228236	2.07736
5.68653	0.000229032	2.0917
5.71943	0.000229817	2.10594
5.75209	0.00023059	2.12008
5.78453	0.000231352	2.13414
5.81673	0.000232103	2.14809
5.84878	0.000232845	2.16205
5.88061	0.000233569	2.17585
5.91221	0.000234291	2.18958
5.9436	0.000234999	2.20321
5.97477	0.0002357	2.21676
6.00573	0.00023639	2.23023
6.0365	0.00023707	2.24361
6.06705	0.000237741	2.25692
6.0974	0.000238405	2.27014
6.12755	0.000239058	2.28329
6.15751	0.000239703	2.29635
6.18727	0.000240341	2.30934
6.21683	0.00024097	2.32225
6.24621	0.000241591	2.33509
6.27539	0.000242205	2.34785
6.30439	0.000242811	2.36054
6.33319	0.000243412	2.37315
6.36182	0.000244004	2.38569
6.39026	0.00024459	2.39815
6.41852	0.00024517	2.41055
6.4466	0.000245744	2.42287
6.47449	0.000246311	2.43512
6.50221	0.000246872	2.44729
6.52975	0.000247428	2.4594
6.55712	0.00024798	2.47144
6.58431	0.000248525	2.48341
6.61132	0.000249066	2.4953
6.63817	0.000249601	2.50713
6.66483	0.000250133	2.51889
6.69133	0.00025066	2.53058
6.71766	0.000251181	2.5422
6.74381	0.0002517	2.55375
6.7698	0.000252213	2.56523
6.79562	0.000252723	2.57664
6.82128	0.000253229	2.58799
6.84676	0.000253732	2.59927
6.87209	0.00025423	2.61048
6.89724	0.000254726	2.62162
6.92223	0.000255218	2.63269
6.94706	0.000255707	2.64371
6.97172	0.000256193	2.65464
6.99622	0.000256676	2.66552
7.02057	0.000257155	2.67633
7.04475	0.000257632	2.68707
7.06877	0.000258105	2.69774
7.09263	0.000258577	2.70835
7.11634	0.000259045	2.7189
7.13989	0.000259511	2.72938
7.16328	0.000259974	2.73979
7.18651	0.000260435	2.75014
7.2096	0.000260893	2.76042
7.23253	0.000261348	2.77064
7.2553	0.000261803	2.78079
7.27788	0.000262261	2.79069
7.30031	0.000262711	2.80083
7.32261	0.000263156	2.81067
7.34474	0.0002636	2.82064
7.36674	0.000264041	2.83039
7.38858	0.000264481	2.84021
7.41029	0.000264918	2.84986
7.43184	0.000265354	2.85954
7.45326	0.000265786	2.86907
7.47453	0.000266217	2.87862
7.49566	0.000266647	2.88805
7.51664	0.000267074	2.89746
7.53749	0.000267499	2.90677
7.55819	0.000267922	2.91606
7.57876	0.000268343	2.92526
7.59919	0.000268762	2.93442
7.61948	0.00026918	2.94351
7.63964	0.000269596	2.95255
7.65966	0.00027001	2.96152
7.67955	0.000270422	2.97045
7.6993	0.000270832	2.9793
7.71893	0.00027124	2.98812
7.73842	0.000271647	2.99686
7.75778	0.000272052	3.00556
7.77701	0.000272455	3.01419
7.79612	0.000272856	3.02278
7.8151	0.000273256	3.03129
7.83395	0.000273654	3.03977
7.85268	0.00027405	3.04818
7.87128	0.000274445	3.05655
7.88977	0.000274837	3.06485
7.90812	0.000275229	3.07312
7.92636	0.000275618	3.08131
7.94448	0.000276006	3.08947
7.96248	0.000276392	3.09755
7.98035	0.000276778	3.10562
7.99812	0.00027716	3.11359
8.01576	0.000277542	3.12156
8.0333	0.000277921	3.12943
8.05071	0.0002783	3.1373
8.06802	0.000278675	3.14506
8.0852	0.000279052	3.15284
8.10229	0.000279423	3.16049
8.11924	0.000279798	3.16818
8.13612	0.000280164	3.17572
8.15285	0.000280538	3.18334
8.16951	0.000280899	3.19076
8.18602	0.000281272	3.19832
8.20248	0.000281628	3.2056
8.21877	0.000282001	3.21312
8.23504	0.000282348	3.22024
8.25109	0.000282725	3.22775
8.26718	0.000283062	3.23468
8.28299	0.000283445	3.24223
8.29893	0.000283766	3.24889
8.31447	0.000284165	3.25658
8.3303	0.00028446	3.26287
8.34553	0.000284885	3.27084
8.36131	0.000285139	3.27656
8.37616	0.000285613	3.28507
8.39199	0.000285797	3.28989
8.40629	0.00028636	3.2994
8.42238	0.000286421	3.30268
8.43587	0.000287151	3.31403
8.45256	0.000286998	3.31469
8.46473	0.000288036	3.32933
8.48257	0.000287512	3.32544
8.49251	0.000289114	3.34592
8.51237	0.000287986	3.33411
8.51846	0.000290594	3.36483
8.5413	0.000288627	3.33963
8.54136	0.000292796	3.38701
8.56692	0.000290132	3.3417
8.5604	0.000295772	3.41106
8.58663	0.000293009	3.34328
8.57781	0.000298498	3.43102
8.60446	0.000295523	3.34838
8.59652	0.000300065	3.44453
8.62388	0.000296762	3.35614
8.61617	0.000300982	3.45529
8.64398	0.000297484	3.36466
8.63593	0.00030172	3.46532
8.66408	0.000298087	3.37326
8.65553	0.000302418	3.47514
8.68398	0.000298664	3.3818
8.67496	0.0003031	3.48479
8.70371	0.000299226	3.39026
8.69419	0.000303776	3.49433
8.72324	0.000299783	3.39865
8.71325	0.000304436	3.50371
8.7426	0.000300323	3.40696
8.73213	0.000305087	3.51297
8.76175	0.000300858	3.41518
8.75081	0.000305733	3.52212
8.78075	0.000301378	3.42335
8.76935	0.000306368	3.53116
8.79958	0.000301893	3.43144
8.78772	0.000306996	3.54009
8.81824	0.000302401	3.43946
8.80592	0.000307618	3.54892
8.83674	0.000302902	3.44741
8.82397	0.000308232	3.55765
8.85506	0.000303396	3.45529
8.84186	0.000308839	3.56627
8.87325	0.00030388	3.46312
8.8596	0.000309437	3.5748
8.89128	0.000304357	3.47087
8.87724	0.000310016	3.58316
8.90919	0.000304822	3.47857
8.89468	0.000310614	3.59159
8.92694	0.000305292	3.48621
8.91203	0.000311193	3.59984
8.94458	0.000305748	3.49381
8.92926	0.000311763	3.60802
8.96209	0.000306198	3.50134
8.94636	0.000312327	3.6161
8.97948	0.000306641	3.50883
8.96335	0.000312884	3.62411
8.99676	0.000307078	3.51627
8.98024	0.000313434	3.63203
9.01393	0.000307507	3.52366
8.99704	0.000313977	3.63988
9.03101	0.00030793	3.53102
9.01374	0.000314512	3.64766
9.048	0.000308345	3.53833
9.03038	0.000315044	3.65537
9.06491	0.000308756	3.54562
9.04694	0.000315565	3.66301
9.08176	0.000309156	3.55288
9.06343	0.000316078	3.67058
9.09852	0.00030955	3.56011
9.07986	0.000316584	3.67808
9.11523	0.000309937	3.56731
9.09624	0.000317081	3.68552
9.13188	0.000310315	3.57449
9.11257	0.000317571	3.69289
9.14848	0.000310687	3.58166
9.12886	0.000318052	3.7002
9.16504	0.000311049	3.5888
9.14511	0.000318526	3.70745
9.18157	0.000311403	3.59594
9.16134	0.00031899	3.71465
9.19807	0.000311748	3.60307
9.17756	0.000319446	3.72179
9.21456	0.000312083	3.61019
9.19376	0.000319893	3.72888
9.23104	0.00031241	3.61732
9.20997	0.000320334	3.73594
9.24752	0.000312729	3.62445
9.22619	0.000320762	3.74291
9.26402	0.000313032	3.6316
9.24243	0.000321181	3.74986
9.28054	0.000313326	3.63875
9.2587	0.000321593	3.75677
9.29709	0.00031361	3.64593
9.275	0.000321996	3.76364
9.31368	0.000313882	3.65313
9.29134	0.00032239	3.77049
9.33032	0.000314143	3.66037
9.30773	0.000322776	3.7773
9.34702	0.000314391	3.66763
9.32419	0.000323154	3.78409
9.36378	0.000314628	3.67494
9.34071	0.000323525	3.79087
9.38062	0.000314855	3.68229
9.35731	0.000323887	3.79763
9.39754	0.000315067	3.68969
9.37398	0.000324245	3.80439
9.41454	0.000315271	3.69713
9.39073	0.000324596	3.81115
9.43164	0.000315464	3.70464
9.40756	0.000324943	3.81791
9.44882	0.000315648	3.7122
9.42448	0.000325285	3.82468
9.46609	0.000315822	3.71982
9.44149	0.000325623	3.83146
9.48346	0.00031599	3.72749
9.45858	0.000325959	3.83826
9.50091	0.000316152	3.73523
9.47575	0.000326294	3.84508
9.51844	0.00031631	3.74303
9.49299	0.000326627	3.85193
9.53605	0.000316464	3.75088
9.51031	0.000326959	3.8588
9.55373	0.000316617	3.75879
9.52769	0.000327292	3.86569
9.57146	0.00031677	3.76675
9.54513	0.000327625	3.87262
9.58925	0.000316921	3.77476
9.56262	0.000327957	3.87957
9.60708	0.000317078	3.78282
9.58015	0.000328292	3.88654
9.62493	0.000317239	3.79091
9.59771	0.000328627	3.89354
9.6428	0.000317406	3.79904
9.6153	0.000328964	3.90056
9.66067	0.000317578	3.80719
9.6329	0.000329303	3.9076
9.67854	0.000317761	3.81538
9.65051	0.000329643	3.91465
9.69639	0.000317948	3.82358
9.66811	0.000329984	3.92172
9.71422	0.000318144	3.8318
9.6857	0.000330326	3.9288
9.732	0.000318349	3.84003
9.70326	0.00033067	3.93587
9.74974	0.000318563	3.84827
9.72078	0.000331014	3.94295
9.76741	0.000318788	3.8565
9.73825	0.000331359	3.95002
9.78499	0.000319022	3.86472
9.75566	0.000331705	3.95708
9.8025	0.000319266	3.87293
9.77301	0.000332051	3.96413
9.8199	0.000319521	3.88111
9.79028	0.000332397	3.97115
9.83722	0.000319784	3.88928
9.80747	0.000332743	3.97816
9.85441	0.000320057	3.89742
9.82457	0.000333088	3.98514
9.87149	0.00032034	3.90552
9.84157	0.000333434	3.9921
9.88845	0.000320631	3.9136
9.85847	0.000333779	3.99902
9.90528	0.000320932	3.92163
9.87525	0.000334123	4.00591
9.92197	0.000321241	3.92961
9.89192	0.000334467	4.01276
9.93852	0.000321558	3.93755
9.90846	0.000334809	4.01957
9.95492	0.000321883	3.94544
9.92488	0.000335151	4.02633
9.97117	0.000322216	3.95328
9.94116	0.000335491	4.03306
9.98727	0.000322555	3.96106
9.95731	0.00033583	4.03973
10.0032	0.000322901	3.96877
9.97332	0.000336168	4.04635
10.019	0.000323252	3.97643
9.98919	0.000336504	4.05292
10.0346	0.000323609	3.98403
10.0049	0.000336839	4.05944
10.0501	0.000323971	3.99156
10.0205	0.000337167	4.06589
10.0654	0.000324337	3.99905
10.0359	0.000337502	4.07233
10.0805	0.000324708	4.0064
10.0512	0.000337832	4.07866
10.0955	0.000325082	4.01375
10.0663	0.000338158	4.08496
10.1103	0.00032546	4.021
10.0812	0.000338483	4.09119
10.1249	0.00032584	4.02818
10.096	0.000338806	4.09737
10.1394	0.000326223	4.03529
10.1107	0.000339127	4.10348
10.1537	0.000326608	4.04232
10.1251	0.000339445	4.10953
10.1678	0.000326992	4.0493
10.1394	0.000339761	4.11552
10.1818	0.000327379	4.05616
10.1536	0.000340075	4.12143
10.1956	0.000327769	4.06298
10.1676	0.000340386	4.12729
10.2092	0.000328158	4.0697
10.1814	0.000340695	4.13308
10.2227	0.000328548	4.07636
10.1951	0.000341001	4.13882
10.2359	0.000328937	4.08293
10.2086	0.000341304	4.14448
10.2491	0.000329327	4.08944
10.2219	0.000341606	4.15009
10.262	0.000329717	4.09586
10.2351	0.000341904	4.15563
10.2749	0.000330106	4.10222
10.2482	0.0003422	4.1611
10.2875	0.000330494	4.1085
10.261	0.000342493	4.16652
10.3	0.000330883	4.11471
10.2738	0.000342784	4.17187
10.3123	0.000331269	4.12084
10.2864	0.000343072	4.17716
10.3245	0.000331654	4.12689
10.2988	0.000343357	4.18238
10.3365	0.000332038	4.13288
10.311	0.000343639	4.18754
10.3484	0.00033242	4.13879
10.3232	0.000343919	4.19264
10.3601	0.000332804	4.14466
10.3352	0.000344196	4.1977
10.3717	0.000333183	4.15043
10.347	0.000344471	4.20269
10.3832	0.000333562	4.15615
10.3588	0.000344743	4.20762
10.3945	0.000333939	4.16179
10.3703	0.000345012	4.21249
10.4057	0.000334314	4.16738
10.3818	0.000345278	4.21731
10.4167	0.000334687	4.17289
10.3931	0.000345542	4.22207
10.4276	0.000335059	4.17834
10.4042	0.000345803	4.22677
10.4384	0.000335428	4.18373
10.4153	0.000346062	4.23141
10.449	0.000335796	4.18905
10.4262	0.000346317	4.236
10.4595	0.000336161	4.19431
10.4369	0.00034657	4.24054
10.4699	0.000336524	4.19951
10.4476	0.00034682	4.24502
10.4801	0.000336885	4.20464
10.4581	0.000347067	4.24945
10.4903	0.000337244	4.20972
10.4685	0.000347312	4.25382
10.5002	0.000337599	4.21471
10.4787	0.000347554	4.25812
10.5101	0.000337954	4.21967
10.4888	0.000347792	4.26238
10.5198	0.000338305	4.22455
10.4989	0.000348028	4.26659
10.5294	0.000338655	4.22939
10.5088	0.000348262	4.27075
10.5389	0.000339004	4.23417
10.5185	0.000348493	4.27487
10.5483	0.000339349	4.2389
10.5282	0.000348721	4.27893
10.5576	0.000339693	4.24358
10.5378	0.000348946	4.28295
10.5668	0.000340036	4.2482
10.5473	0.00034917	4.28692
10.5759	0.000340377	4.25278
10.5566	0.000349391	4.29085
10.5849	0.000340715	4.25732
10.5659	0.000349609	4.29474
10.5937	0.000341051	4.26179
10.5751	0.000349825	4.29857
10.6025	0.000341387	4.26623
10.5841	0.000350038	4.30237
10.6112	0.00034172	4.27062
10.5931	0.000350249	4.30613
10.6198	0.000342051	4.27496
10.602	0.000350457	4.30983
10.6282	0.00034238	4.27926
10.6107	0.000350662	4.3135
10.6366	0.000342707	4.2835
10.6194	0.000350865	4.31712
10.6449	0.000343032	4.28771
10.628	0.000351065	4.3207
10.6531	0.000343356	4.29186
10.6365	0.000351263	4.32425
10.6612	0.000343678	4.29598
10.6449	0.000351458	4.32775
10.6692	0.000343998	4.30006
10.6532	0.00035165	4.3312
10.6771	0.000344316	4.30409
10.6614	0.00035184	4.33462
10.6849	0.000344633	4.30808
10.6696	0.000352028	4.338
10.6927	0.000344948	4.31203
10.6776	0.000352212	4.34134
10.7003	0.000345262	4.31594
10.6856	0.000352394	4.34464
10.7079	0.000345574	4.31981
10.6935	0.000352573	4.3479
10.7154	0.000345884	4.32365
10.7013	0.00035275	4.35112
10.7228	0.000346193	4.32744
10.709	0.000352924	4.35431
10.7301	0.0003465	4.3312
10.7167	0.000353096	4.35746
10.7373	0.000346806	4.33492
10.7242	0.000353264	4.36057
10.7445	0.000347112	4.3386
10.7317	0.000353431	4.36365
10.7516	0.000347416	4.34226
10.7391	0.000353595	4.36669
10.7586	0.000347718	4.34587
10.7465	0.000353755	4.36969
10.7655	0.000348019	4.34945
10.7537	0.000353913	4.37265
10.7723	0.000348319	4.353
10.7609	0.000354068	4.37558
10.7791	0.000348618	4.35651
10.7681	0.00035422	4.37847
10.7857	0.000348916	4.35999
10.7751	0.00035437	4.38133
10.7924	0.000349214	4.36344
10.7821	0.000354516	4.38415
10.7989	0.000349511	4.36686
10.789	0.00035466	4.38694
10.8054	0.000349807	4.37025
10.7959	0.000354801	4.3897
10.8118	0.000350102	4.37361
10.8027	0.000354939	4.39242
10.8181	0.000350397	4.37695
10.8094	0.000355074	4.39511
10.8244	0.000350691	4.38025
10.816	0.000355206	4.39776
10.8306	0.000350985	4.38353
10.8227	0.000355334	4.40038
10.8367	0.000351279	4.38678
10.8292	0.00035546	4.40297
10.8428	0.000351572	4.39
10.8357	0.000355582	4.40552
10.8488	0.000351865	4.39319
10.8421	0.000355701	4.40803
10.8547	0.000352157	4.39636
10.8485	0.000355818	4.41052
10.8606	0.000352449	4.3995
10.8548	0.00035593	4.41296
10.8663	0.000352741	4.40261
10.861	0.000356039	4.41538
10.8721	0.000353033	4.4057
10.8672	0.000356146	4.41776
10.8777	0.000353324	4.40876
10.8733	0.000356249	4.42011
10.8834	0.000353615	4.41179
10.8794	0.000356355	4.42245
10.889	0.000353905	4.41481
10.8855	0.000356459	4.42477
10.8945	0.000354193	4.4178
10.8915	0.000356559	4.42706
10.9	0.000354482	4.42076
10.8975	0.000356658	4.42932
10.9054	0.000354768	4.42369
10.9034	0.000356755	4.43156
10.9108	0.000355053	4.42659
10.9092	0.000356852	4.43377
10.9162	0.000355334	4.42946
10.915	0.000356949	4.43596
10.9215	0.000355612	4.43228
10.9208	0.000357048	4.43814
10.9267	0.000355886	4.43507
10.9265	0.000357149	4.44031
10.932	0.000356154	4.43782
10.9321	0.000357253	4.44247
10.9372	0.000356416	4.44052
10.9377	0.000357361	4.44462
10.9423	0.00035667	4.44317
10.9432	0.000357474	4.44677
10.9475	0.000356922	4.4458
10.9486	0.000357592	4.44893
10.9526	0.000357163	4.44837
10.9541	0.000357716	4.45109
10.9577	0.000357395	4.45089
10.9594	0.000357847	4.45327
10.9628	0.000357617	4.45337
10.9647	0.000357985	4.45545
10.9679	0.00035783	4.45579
10.9699	0.000358129	4.45763
10.973	0.000358036	4.45818
10.9751	0.000358278	4.45982
10.978	0.000358235	4.46053
10.9803	0.000358432	4.46201
10.983	0.000358426	4.46283
10.9853	0.00035859	4.4642
10.988	0.000358612	4.46511
10.9904	0.00035875	4.46639
10.993	0.000358793	4.46735
10.9954	0.000358913	4.46857
10.9979	0.00035897	4.46957
11.0003	0.000359077	4.47074
11.0028	0.000359144	4.47176
11.0052	0.000359242	4.47289
11.0077	0.000359315	4.47394
11.0101	0.000359407	4.47504
11.0125	0.000359484	4.47609
11.0149	0.000359572	4.47718
11.0173	0.000359651	4.47823
11.0197	0.000359737	4.4793
11.0221	0.000359816	4.48034
11.0245	0.0003599	4.4814
11.0268	0.00035998	4.48244
11.0292	0.000360063	4.48349
11.0315	0.000360143	4.48452
11.0339	0.000360224	4.48556
11.0362	0.000360304	4.48659
11.0385	0.000360385	4.48761
11.0408	0.000360464	4.48863
11.0431	0.000360544	4.48965
11.0454	0.000360623	4.49067
11.0477	0.000360702	4.49167
11.05	0.000360781	4.49268
11.0523	0.00036086	4.49368
11.0545	0.000360938	4.49468
11.0568	0.000361016	4.49567
11.059	0.000361094	4.49666
11.0613	0.000361171	4.49765
11.0635	0.000361248	4.49863
11.0657	0.000361326	4.49961
11.0679	0.000361403	4.50059
11.0701	0.000361479	4.50156
11.0723	0.000361555	4.50253
11.0745	0.000361631	4.50349
11.0767	0.000361707	4.50445
11.0789	0.000361782	4.50541
11.0811	0.000361858	4.50636
11.0832	0.000361932	4.50731
11.0854	0.000362007	4.50826
11.0875	0.000362081	4.5092
11.0897	0.000362156	4.51014
11.0918	0.00036223	4.51108
11.0939	0.000362303	4.51201
11.0961	0.000362377	4.51294
11.0982	0.00036245	4.51386
11.1003	0.000362523	4.51478
11.1024	0.000362595	4.5157
11.1045	0.000362668	4.51661
11.1065	0.00036274	4.51752
11.1086	0.000362812	4.51843
11.1107	0.000362884	4.51933
11.1128	0.000362956	4.52024
11.1148	0.000363028	4.52114
11.1169	0.000363099	4.52204
11.1189	0.00036317	4.52293
11.121	0.000363241	4.52382
11.123	0.000363312	4.52471
11.1251	0.000363382	4.52559
11.1271	0.000363452	4.52647
11.1291	0.000363522	4.52735
11.1311	0.000363592	4.52822
11.1331	0.000363661	4.52909
11.1351	0.00036373	4.52995
11.1371	0.000363799	4.53082
11.1391	0.000363868	4.53168
11.1411	0.000363936	4.53253
11.143	0.000364004	4.53339
11.145	0.000364072	4.53424
11.147	0.00036414	4.53508
11.1489	0.000364208	4.53593
11.1508	0.000364275	4.53677
11.1528	0.000364342	4.5376
11.1547	0.000364409	4.53844
11.1567	0.000364475	4.53927
11.1586	0.000364542	4.5401
11.1605	0.000364608	4.54092
11.1624	0.000364674	4.54174
11.1643	0.00036474	4.54256
11.1662	0.000364805	4.54338
11.1681	0.000364871	4.54419
11.17	0.000364936	4.545
11.1719	0.000365001	4.5458
11.1737	0.000365065	4.54661
11.1756	0.00036513	4.54741
11.1775	0.000365194	4.5482
11.1793	0.000365258	4.549
11.1812	0.000365322	4.54979
11.1831	0.000365386	4.55058
11.1849	0.000365449	4.55136
11.1867	0.000365513	4.55215
11.1886	0.000365576	4.55293
11.1904	0.000365639	4.55371
11.1922	0.000365701	4.55448
11.1941	0.000365764	4.55525
11.1959	0.000365826	4.55602
11.1977	0.000365888	4.55679
11.1995	0.00036595	4.55755
11.2013	0.000366012	4.55831
11.2031	0.000366073	4.55907
11.2049	0.000366135	4.55983
11.2067	0.000366196	4.56058
11.2085	0.000366257	4.56133
11.2103	0.000366318	4.56208
11.2121	0.000366378	4.56282
11.2138	0.000366439	4.56356
11.2156	0.000366499	4.5643
11.2174	0.000366559	4.56504
11.2192	0.000366619	4.56578
11.2209	0.000366679	4.56651
11.2227	0.000366739	4.56724
11.2244	0.000366798	4.56797
11.2262	0.000366858	4.56869
11.228	0.000366917	4.56941
11.2297	0.000366976	4.57013
11.2315	0.000367035	4.57085
11.2332	0.000367093	4.57157
11.2349	0.000367152	4.57228
11.2367	0.00036721	4.57299
11.2384	0.000367268	4.5737
11.2402	0.000367326	4.5744
11.2419	0.000367385	4.57511
11.2436	0.000367443	4.57581
11.2454	0.0003675	4.57651
11.2471	0.000367557	4.57721
11.2488	0.000367615	4.5779
11.2506	0.000367672	4.57859
11.2523	0.000367729	4.57928
11.254	0.000367786	4.57997
11.2558	0.000367843	4.58066
11.2575	0.0003679	4.58134
11.2592	0.000367957	4.58202
11.261	0.000368014	4.5827
11.2627	0.00036807	4.58338
11.2644	0.000368126	4.58406
11.2662	0.000368183	4.58473
11.2679	0.000368239	4.5854
11.2696	0.000368295	4.58607
11.2714	0.000368351	4.58674
11.2731	0.000368407	4.5874
11.2749	0.000368463	4.58807
11.2766	0.000368519	4.58873
11.2784	0.000368574	4.58939
11.2801	0.00036863	4.59005
11.2819	0.000368686	4.5907
11.2837	0.000368741	4.59136
11.2854	0.000368797	4.59201
11.2872	0.000368853	4.59266
11.289	0.000368908	4.59331
11.2908	0.000368964	4.59395
11.2926	0.00036902	4.5946
11.2944	0.000369075	4.59524
11.2962	0.000369131	4.59588
11.298	0.000369187	4.59653
11.2998	0.000369243	4.59716
11.3017	0.000369299	4.5978
11.3035	0.000369355	4.59844
11.3054	0.000369411	4.59908
11.3072	0.000369468	4.59972
11.3091	0.000369525	4.60035
11.311	0.000369582	4.60099
11.3129	0.000369639	4.60162
11.3148	0.000369697	4.60226
11.3167	0.000369755	4.6029
11.3187	0.000369813	4.60354
11.3206	0.000369873	4.60419
11.3226	0.000369933	4.60483
11.3246	0.000369993	4.60548
11.3265	0.000370054	4.60614
11.3285	0.000370115	4.60679
11.3305	0.000370177	4.60745
11.3326	0.00037024	4.60812
11.3346	0.000370303	4.60879
11.3366	0.000370367	4.60947
11.3387	0.000370432	4.61015
11.3408	0.000370497	4.61084
11.3428	0.000370564	4.61154
11.3449	0.000370631	4.61225
11.347	0.000370698	4.61295
11.3491	0.000370767	4.61367
11.3512	0.000370834	4.6144
11.3533	0.000370904	4.61513
11.3554	0.000370974	4.61586
11.3575	0.000371043	4.6166
11.3597	0.000371114	4.61735
11.3618	0.000371186	4.6181
11.364	0.000371257	4.61886
11.3661	0.000371329	4.61962
11.3682	0.0003714	4.62039
11.3704	0.000371474	4.62116
11.3725	0.000371546	4.62193
11.3747	0.00037162	4.62271
11.3768	0.000371692	4.62349
11.379	0.000371766	4.62427
11.3811	0.000371839	4.62506
11.3833	0.000371914	4.62585
11.3854	0.000371987	4.62664
11.3876	0.000372061	4.62743
11.3897	0.000372136	4.62823
11.3918	0.000372209	4.62902
11.394	0.000372285	4.62982
11.3961	0.000372359	4.63062
11.3982	0.000372432	4.63142
11.4004	0.000372508	4.63222
11.4025	0.00037258	4.63301
11.4046	0.000372656	4.63381
11.4067	0.000372731	4.63461
11.4088	0.000372803	4.63541
11.4109	0.000372878	4.63621
11.413	0.000372953	4.63701
11.4151	0.000373027	4.63781
11.4172	0.0003731	4.6386
11.4192	0.000373174	4.6394
11.4213	0.000373248	4.64019
11.4234	0.000373321	4.64098
11.4254	0.000373393	4.64177
11.4275	0.000373468	4.64256
11.4295	0.000373542	4.64336
11.4315	0.000373613	4.64414
11.4336	0.000373686	4.64492
11.4356	0.000373759	4.64571
11.4376	0.000373832	4.64649
11.4396	0.000373903	4.64727
11.4416	0.000373975	4.64804
11.4436	0.000374047	4.64882
11.4456	0.000374119	4.64959
11.4475	0.000374191	4.65036
11.4495	0.00037426	4.65113
11.4515	0.000374332	4.65189
11.4534	0.000374403	4.65266
11.4554	0.000374474	4.65342
11.4573	0.000374544	4.65418
11.4592	0.000374613	4.65493
11.4611	0.000374683	4.65568
11.463	0.000374753	4.65644
11.4649	0.000374822	4.65718
11.4668	0.000374892	4.65793
11.4687	0.000374959	4.65867
11.4706	0.000375028	4.65941
11.4724	0.000375096	4.66014
11.4743	0.000375165	4.66088
11.4761	0.000375233	4.66161
11.478	0.0003753	4.66234
11.4798	0.000375366	4.66306
11.4816	0.000375433	4.66378
11.4834	0.0003755	4.6645
11.4852	0.000375567	4.66521
11.487	0.000375633	4.66593
11.4888	0.0003757	4.66664
11.4906	0.000375766	4.66735
11.4924	0.00037583	4.66805
11.4941	0.000375895	4.66875
11.4959	0.00037596	4.66944
11.4976	0.000376025	4.67014
11.4994	0.000376089	4.67083
11.5011	0.000376154	4.67152
11.5028	0.000376218	4.67221
11.5045	0.00037628	4.67289
11.5062	0.000376344	4.67357
11.5079	0.000376406	4.67424
11.5096	0.00037647	4.67491
11.5113	0.000376532	4.67558
11.513	0.000376595	4.67625
11.5146	0.000376657	4.67692
11.5163	0.000376719	4.67758
11.5179	0.000376779	4.67824
11.5196	0.00037684	4.67889
11.5212	0.000376901	4.67954
11.5228	0.000376961	4.68019
11.5244	0.000377022	4.68083
11.526	0.000377082	4.68147
11.5276	0.000377142	4.68212
11.5292	0.000377202	4.68276
11.5308	0.00037726	4.68338
11.5323	0.000377319	4.68401
11.5339	0.000377377	4.68464
11.5354	0.000377436	4.68526
11.537	0.000377494	4.68588
11.5385	0.000377552	4.6865
11.5401	0.000377609	4.68711
11.5416	0.000377667	4.68773
11.5431	0.000377725	4.68834
11.5446	0.00037778	4.68894
11.5461	0.000377836	4.68954
11.5476	0.000377892	4.69013
11.5491	0.000377949	4.69073
11.5505	0.000378004	4.69132
11.552	0.00037806	4.69191
11.5535	0.000378115	4.6925
11.5549	0.000378171	4.69309
11.5564	0.000378225	4.69367
11.5578	0.00037828	4.69425
11.5592	0.000378332	4.69482
11.5606	0.000378386	4.69539
11.562	0.00037844	4.69596
11.5634	0.000378493	4.69653
11.5648	0.000378546	4.69709
11.5662	0.000378599	4.69765
11.5676	0.000378652	4.69821
11.569	0.000378704	4.69876
11.5704	0.000378757	4.69932
11.5717	0.000378809	4.69987
11.5731	0.000378861	4.70042
11.5744	0.000378913	4.70097
11.5758	0.000378962	4.70151
11.5771	0.000379013	4.70204
11.5784	0.000379064	4.70258
11.5797	0.000379114	4.70311
11.581	0.000379164	4.70364
11.5824	0.000379214	4.70417
11.5837	0.000379264	4.7047
11.5849	0.000379314	4.70522
11.5862	0.000379363	4.70574
11.5875	0.000379413	4.70626
11.5888	0.000379462	4.70678
11.5901	0.00037951	4.70729
11.5913	0.000379559	4.70781
11.5926	0.000379605	4.70831
11.5938	0.000379653	4.70881
11.5951	0.0003797	4.70931
11.5963	0.000379748	4.70981
11.5975	0.000379795	4.7103
11.5987	0.000379842	4.7108
11.5999	0.000379889	4.71129
11.6011	0.000379935	4.71178
11.6023	0.000379981	4.71227
11.6035	0.000380028	4.71275
11.6047	0.000380074	4.71324
11.6059	0.00038012	4.71372
11.6071	0.000380166	4.7142
11.6083	0.000380211	4.71468
11.6094	0.000380254	4.71515
11.6106	0.000380298	4.71561
11.6117	0.000380343	4.71608
11.6129	0.000380387	4.71654
11.614	0.000380431	4.717
11.6152	0.000380475	4.71746
11.6163	0.000380518	4.71792
11.6174	0.000380562	4.71838
11.6185	0.000380605	4.71883
11.6196	0.000380648	4.71928
11.6207	0.000380691	4.71973
11.6218	0.000380734	4.72018
11.6229	0.000380776	4.72062
11.624	0.000380818	4.72107
11.6251	0.000380861	4.72151
11.6262	0.000380904	4.72196
11.6273	0.000380945	4.7224
11.6284	0.000380987	4.72283
11.6294	0.000381028	4.72326
11.6305	0.000381068	4.72369
11.6315	0.000381109	4.72412
11.6326	0.000381149	4.72454
11.6336	0.000381189	4.72496
11.6346	0.000381229	4.72538
11.6356	0.000381269	4.72579
11.6367	0.000381309	4.72621
11.6377	0.000381349	4.72663
11.6387	0.000381389	4.72704
11.6397	0.000381428	4.72745
11.6407	0.000381467	4.72786
11.6417	0.000381506	4.72827
11.6427	0.000381545	4.72867
11.6437	0.000381586	4.72908
11.6447	0.000381624	4.72948
11.6457	0.000381663	4.72988
11.6467	0.000381701	4.73028
11.6476	0.000381739	4.73068
11.6486	0.000381775	4.73107
11.6496	0.000381813	4.73146
11.6505	0.000381849	4.73185
11.6514	0.000381887	4.73223
11.6524	0.000381924	4.73262
11.6533	0.000381961	4.733
11.6543	0.000381995	4.73338
11.6552	0.000382031	4.73375
11.6561	0.000382066	4.73412
11.657	0.000382103	4.7345
11.6579	0.000382141	4.73487
11.6588	0.000382177	4.73525
11.6598	0.000382212	4.73562
11.6607	0.000382248	4.73599
11.6616	0.000382283	4.73636
11.6625	0.000382319	4.73672
11.6634	0.000382354	4.73709
11.6643	0.000382389	4.73745
11.6651	0.000382424	4.73782
11.666	0.000382456	4.73817
11.6669	0.00038249	4.73852
11.6677	0.000382524	4.73887
11.6686	0.000382558	4.73922
11.6694	0.00038259	4.73956
11.6703	0.000382624	4.7399
11.6711	0.000382657	4.74025
11.6719	0.00038269	4.74059
11.6728	0.000382723	4.74093
11.6736	0.00038276	4.74128
11.6745	0.000382793	4.74162
11.6753	0.000382827	4.74197
11.6761	0.00038286	4.74231
11.677	0.000382893	4.74266
11.6778	0.00038292	4.74298
11.6786	0.000382953	4.74331
11.6794	0.000382985	4.74364
11.6802	0.000383016	4.74396
11.681	0.000383049	4.74429
11.6818	0.000383079	4.74461
11.6826	0.000383111	4.74493
11.6833	0.000383142	4.74525
11.6841	0.000383174	4.74557
11.6849	0.000383204	4.74589
11.6857	0.000383235	4.74621
11.6865	0.000383267	4.74652
11.6872	0.000383297	4.74684
11.688	0.000383325	4.74714
11.6887	0.000383355	4.74745
11.6895	0.000383384	4.74775
11.6902	0.000383414	4.74805
11.6909	0.000383443	4.74836
11.6917	0.000383477	4.74866
11.6924	0.000383502	4.74896
11.6932	0.00038353	4.74926
11.6939	0.00038356	4.74956
11.6946	0.000383589	4.74985
11.6953	0.000383618	4.75015
11.6961	0.000383652	4.75046
11.6968	0.000383682	4.75076
11.6975	0.000383711	4.75106
11.6983	0.000383741	4.75137
11.699	0.000383766	4.75165
11.6997	0.000383795	4.75194
11.7004	0.000383822	4.75222
11.7011	0.000383846	4.7525
